# Compartmental mixing models for vaccination-status-based societal separation regarding viral respiratory diseases

Joseph Hickey, PhD<sup>1,\*</sup> and Denis G. Rancourt, PhD<sup>1</sup>

<sup>1</sup> Correlation Research in the Public Interest ([correlation-canada.org](https://correlation-canada.org))

\*Corresponding author: [joseph.hickey@ucalgary.ca](mailto:joseph.hickey@ucalgary.ca)

PRE-PRINT UPLOADED TO <https://www.medrxiv.org/> ON 2023-07-05  
(Version 3)

## Abstract

**Background:** Societal separation of unvaccinated people from public spaces has been a novel and controversial COVID-era public health practice in many countries. Models exploring potential consequences of vaccination-status-based separation have not considered how separation influences the contact frequencies in the separated groups; we systematically investigate implementing effects of separation on person-to-person contact frequencies and show this critically determines the predicted epidemiological outcomes, focusing on the attack rates in the vaccinated and unvaccinated populations and the share of infections among vaccinated people that were due to contacts with infectious unvaccinated people.

**Methods:** We describe a susceptible-infectious-recovered (SIR) two-population model for vaccinated and unvaccinated groups of individuals that transmit an infectious disease by person-to-person contact. The degree of separation between the two groups, ranging from zero to complete separation, is implemented using the like-to-like mixing approach developed for sexually-transmitted diseases [1-3], adapted for presumed SARS-CoV-2 transmission. We allow the contact frequencies for individuals in the two groups to be different and depend, with variable strength, on the degree of separation.

**Results:** Separation can either increase or decrease the attack rate among the vaccinated, depending on the type of separation (isolating or compounding), and the contagiousness of the disease. For diseases with low contagiousness, separation can cause an attack rate in the vaccinated, which does not occur without separation.

**Interpretation:** There is no blanket epidemiological advantage to separation, either for the vaccinated or the unvaccinated. Negative epidemiological consequences can occur for both groups.

## Introduction

Models can be used to investigate infectious disease dynamics under different hypotheses about the characteristics of a disease and the effects of health policy. In this endeavour, there are advantages to working with simplest-possible but sufficiently realistic models [3,4], where one should exclude simple models that are not sufficiently realistic for the intended application, either because of their structure or because of incorrect assumptions about the underlying mechanisms. Following this approach, researchers have extended the foundational simple susceptible-infectious-recovered (SIR)-type model to explore diseases with birth and death dynamics, maternal- or vaccine-derived immunity, latency of infection, and so on [5-7]. Recently, SIR models of epidemic dynamics have been implemented with two interacting societal groups (vaccinated and unvaccinated) to examine epidemic outcomes for variable degrees of interaction between the two groups, including whether the unvaccinated put the vaccinated unduly or disproportionately at risk, using epidemiological parameters intended to be representative of SARS-CoV-2 [8-10]. These prior implementations take the person-to-person contact frequencies of the majority and socially-excluded groups to be equal and held constant, irrespective of the degree of separation (or exclusion or “like-to-like mixing”), which is not realistic.

Here, we implement person-to-person contact frequencies that can be different for the two groups and that can either increase or decrease with increasing separation. This is necessary because, for example, in many actual regulatory policies the excluded unvaccinated group is barred from public venues or services where people gather and from public transport where people are in close proximity for various durations. In general, the person-to-person contact frequency of the excluded group decreases with increasing separation if isolation is in effect, and increases with increasing separation if the excluded individuals are crowded together. Implementing this essential model feature gives rise to more complex behaviour of the attack rates in the vaccinated and unvaccinated populations ( $A_v$  and  $A_u$ , respectively), which can increase or decrease, or rise to a maximum before decreasing, as the two groups are increasingly separated. This is also true for the share of infections among vaccinated people that are due to contacts with infectious unvaccinated people ( $B_v$ ).

## Methods

### Model Design

We adopt the standard SIR framework in a structure with two sub-populations. Following the usual SIR model design, a person can be in one of three states: susceptible to infection (S), infectious (I), or recovered and immune (R). If a susceptible person comes into contact with an infectious person, the susceptible person can become infectious, and infectious people eventually recover and become permanently immune.

We divide the population into two groups: vaccinated and unvaccinated. Vaccination is “all or nothing”, such that a proportion  $VE$  of the vaccinated population is immune (are in the R state from the outset of the simulation), where the parameter  $VE$  represents vaccine efficacy. The model also includes a natural immunity parameter,  $NI$ , equal to the proportion of unvaccinated that are immune from the outset due to previous infection [8].

The model parameter  $\eta$  controls the degree of separation between vaccinated and unvaccinated people. When  $\eta = 0$ , there is no separation, and the two groups mix randomly. When  $\eta = 1$ , there is complete separation, such that vaccinated only come into contact with other vaccinated, and unvaccinated only come into contact with other unvaccinated.

The parameter  $\eta$  follows from Garnett and Anderson [3], who modeled sexually-transmitted disease spread in a population divided into groups with different frequencies of sexual contacts. They take the contact frequency to be a constant characteristic of the individuals within a group. However, contact frequency is not generally and solely an intrinsic individual characteristic [11], and separation based on vaccination status may increase or decrease contact frequencies, depending on how the separation is implemented.

In our model, the contact frequencies of the vaccinated and unvaccinated individuals ( $c_v$  and  $c_u$ , respectively) can increase, decrease, or remain constant as the two groups are separated. We implement a new approach to achieve this: we keep the first two terms in Taylor expansions of  $c_v$  and  $c_u$  versus  $\eta$  ( $c_v = c_v^0 (1 + m_v \eta)$  and  $c_u = c_u^0 (1 + m_u \eta)$ ; see Eqs. A3 in Appendix A1). Thus,  $m_v$  and  $m_u$  determine the degree of increase or decrease of the contact frequency in either group, as  $\eta$  is increased.

For example, when  $m_u < 0$ , as separation is increased, the contact frequency of unvaccinated people decreases. This corresponds to separation policy that excludes unvaccinated people from public spaces such as restaurants, cinemas, workplaces, airplanes, trains, etc. [12-15]. Conversely,  $m_u > 0$  corresponds to separation policy that increases contacts between unvaccinated people; for example, by requiring returning unvaccinated travelers to stay in designated facilities [16-18].

The model of Fisman et al. [8] is the special case of our model with  $m_u = m_v = 0$  and  $c_v^0 = c_u^0$ , in which case the equal contact frequencies of both vaccinated and unvaccinated remain constant regardless of the level of separation. Such separation implies two parallel societies, where both populations have their own public spaces and within these spaces maintain the same contact frequencies they would have with no separation. Such an implementation does not represent how separation has been applied during the COVID era in Canada and many countries [12-15,19], since unvaccinated people were excluded from public spaces while vaccinated people were allowed access.

## Model Parameterization

The parameters of our model are listed in Table 1; calculated quantities in Table 2. Technical details of the model are in Appendix 1.

*Table 1: Model parameters*

| Parameter description                                                                                                | Symbol   | Typical value       | Bound     |
|----------------------------------------------------------------------------------------------------------------------|----------|---------------------|-----------|
| Degree of separation between vaccinated and unvaccinated groups                                                      | $\eta$   | (varied)            | 0 to 1    |
| Contact frequency of vaccinated people when $\eta=0$                                                                 | $c_v^0$  | 300 contacts/yr     | $\geq 0$  |
| Contact frequency of unvaccinated people when $\eta=0$                                                               | $c_u^0$  | 300 contacts/yr     | $\geq 0$  |
| Degree of increase ( $m_v > 0$ ) or decrease ( $m_v < 0$ ) of vaccinated contact frequency as a function of $\eta$   | $m_v$    | 0                   | $\geq -1$ |
| Degree of increase ( $m_u > 0$ ) or decrease ( $m_u < 0$ ) of unvaccinated contact frequency as a function of $\eta$ | $m_u$    | (varied)            | $\geq -1$ |
| Rate of recovery from infection (per year)                                                                           | $\gamma$ | 73 yr <sup>-1</sup> | $\geq 0$  |
| Population fraction of vaccinated people                                                                             | $P_v$    | 0.8                 | 0 to 1    |
| Vaccine efficacy                                                                                                     | VE       | 0.8                 | 0 to 1    |
| Proportion of unvaccinated population with natural immunity                                                          | NI       | 0.2                 | 0 to 1    |
| Population of entire society                                                                                         | N        | 10 <sup>7</sup>     | > 0       |

*Table 2: Quantities calculated from model results (mathematical definitions in Appendix 1, Section A1.3)*

| Name                                                                                                      | Symbol |
|-----------------------------------------------------------------------------------------------------------|--------|
| Attack rate in the vaccinated population                                                                  | $A_v$  |
| Attack rate in the unvaccinated population                                                                | $A_u$  |
| Attack rate in the overall population (vaccinated and unvaccinated)                                       | $A_t$  |
| Share of infections among vaccinated people that were due to contacts with infectious unvaccinated people | $B_v$  |

## Analysis

The attack rate among the vaccinated population is defined as the proportion of initially-susceptible vaccinated people who become infected during the epidemic:

$$A_v = \frac{S_v(t_0) - S_v(t_f)}{S_v(t_0)} \quad (1)$$

where  $S_v(t_0)$  is the number of susceptible vaccinated people at the beginning of the epidemic and  $S_v(t_f)$  is the number of susceptible vaccinated people remaining once there are no longer any infectious people in the entire (vaccinated and unvaccinated) population.  $A_u$  is defined equivalently, for the unvaccinated, replacing the  $v$  subscripts with  $u$  in Eq. 1. The overall attack rate for the full (vaccinated plus unvaccinated population) is:

$$A_t = \frac{(S_v(t_0) + S_u(t_0)) - (S_v(t_f) + S_u(t_f))}{(S_v(t_0) + S_u(t_0))} \quad (2)$$

We also define  $B_v$  as the share of infections among vaccinated people that were due to contacts with infectious unvaccinated people (see Eq. A4 of Appendix 1).

We focus on separation types that are targeted at the unvaccinated group. We assume, for simplicity, that separation has no impact on the contact frequency of vaccinated people ( $m_v = 0$ ). We also assume that the contact frequencies in both groups are the same when there is no separation ( $c_v^0 = c_u^0$ ). We use the same values as used by Fisman et al. [8] for the remaining parameters:  $P_v = 0.8$ ,  $VE=0.8$ ,  $NI=0.2$ ,  $\gamma = 73 \text{ yr}^{-1}$ , and  $N = 10^7$ . These values were intended to be representative for COVID-19 and vaccination; in particular, the recovery rate of  $73 \text{ yr}^{-1}$  is equivalent to a recovery time of 5 days [20,21], and assumed to be the same for vaccinated and unvaccinated people.

Appendix 2 contains supplementary figures with results for different parameter combinations, including  $P_v \neq 0.8$ ,  $m_v \neq 0$  and  $c_v^0 \neq c_u^0$ . In all results in this paper, simulations were initiated with a seed number of 100 infectious individuals distributed proportionately among the two sub-populations.

## Results

Fig. 1 shows simulation results for a range of model parameters for different epidemiological conditions and degrees and types of societal separation. Each row of panels is for a fixed value of  $c_v^0 = c_u^0$ . Moving from the top row (Figs. 1a.i to a.iv) to the bottom (Figs. 1e.i to e.iv),  $c_v^0 = c_u^0$ . The left column of panels shows how the attack rate among the vaccinated population,  $A_v$ , changes with the degree of separation,  $\eta$ . The second and third columns show  $A_u$  and  $A_t$  as functions of  $\eta$ , and the right column shows how  $B_v$ , the share of vaccinated infections that were due to contacts with unvaccinated people, varies with  $\eta$ .

$P_v = 0.8$ ,  $VE = 0.8$ ,  $NI = 0.2$ ,  $m_v = 0$ ,  $\gamma = 73$

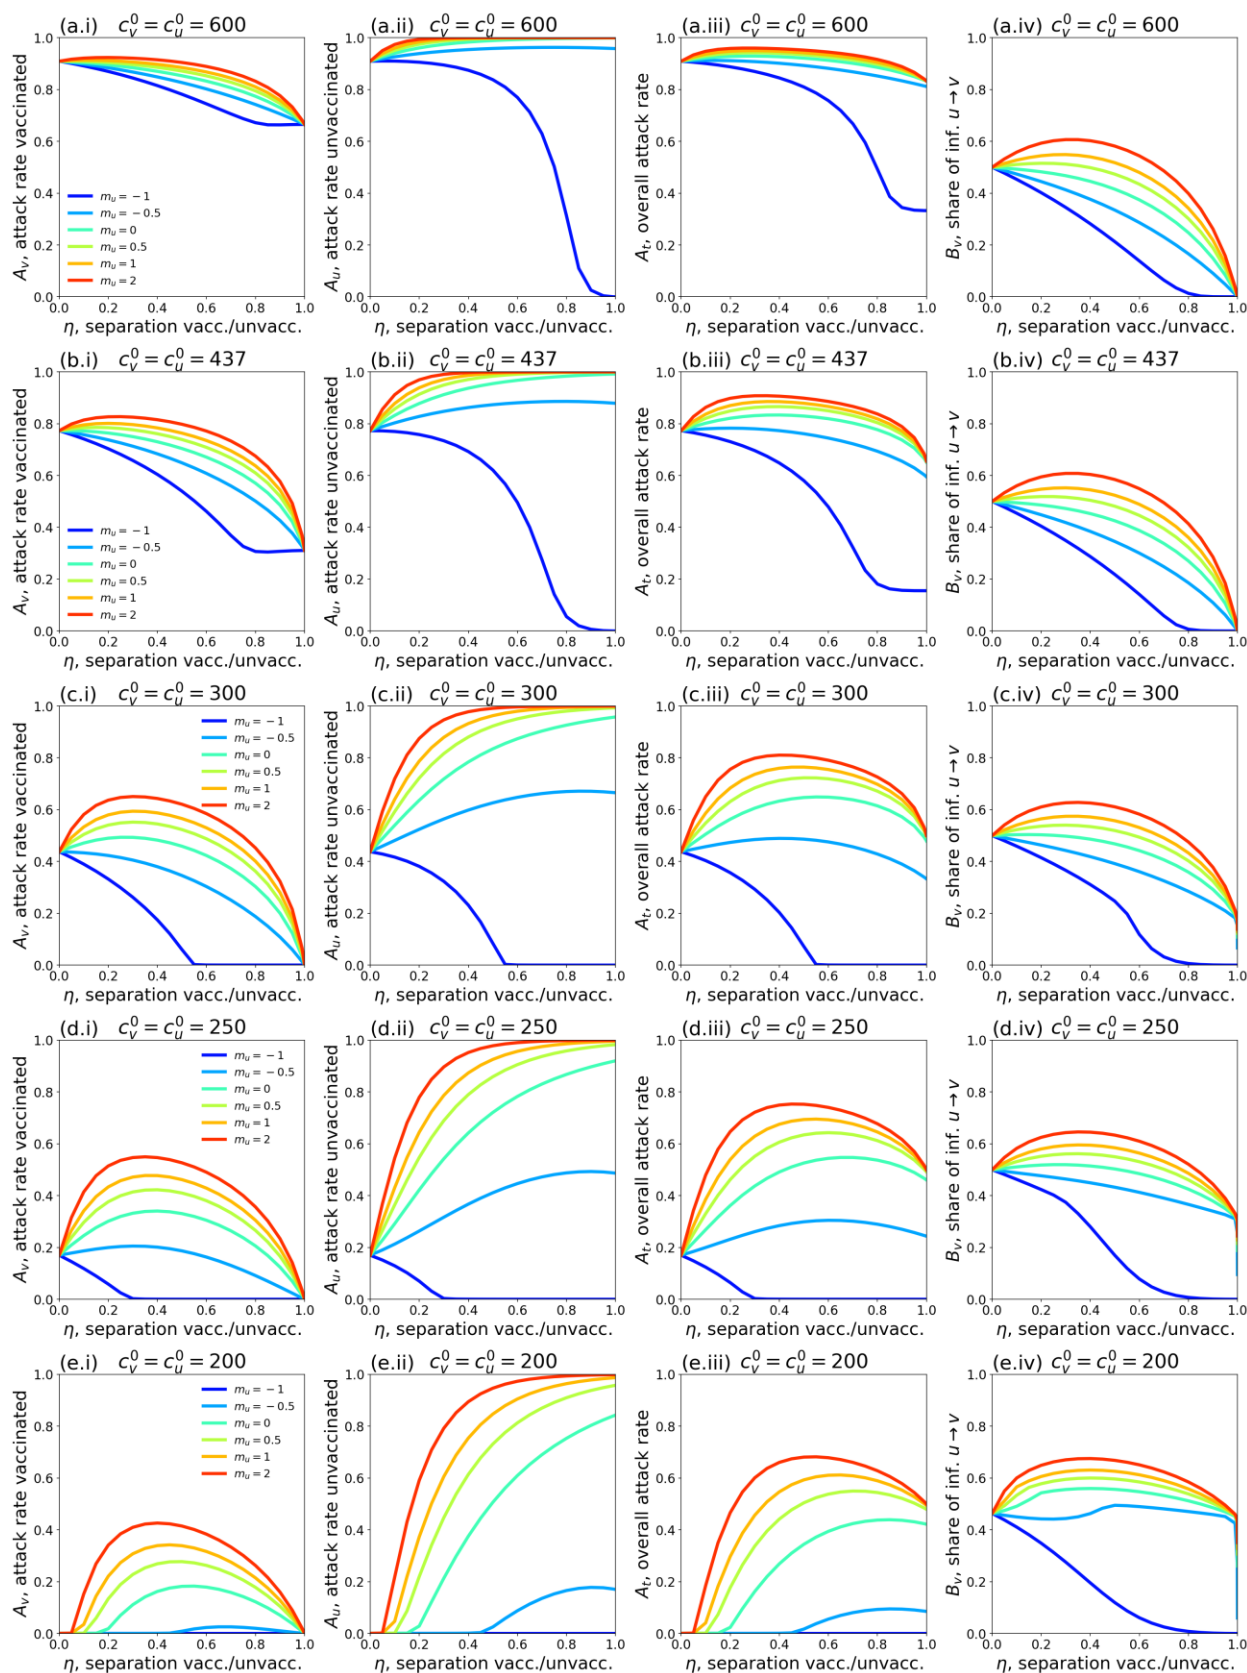

Figure 1: Attack rates  $A_v$  (vaccinated population),  $A_u$  (unvaccinated population),  $A_t$  (overall population) and share of vaccinated infections that were due to contacts with unvaccinated people,  $B_v$ , as functions of the degree of separation,  $\eta$ , between the vaccinated and unvaccinated. Each row of panels shows  $A_v$ ,  $A_u$ ,  $A_t$  and  $B_v$  for a particular choice of  $c_v^0 = c_u^0$ . Values of fixed model parameters are indicated at the top of the figure. For reference, in a single-population (no vaccination) model, the corresponding  $R_0$  values for rows a-e of the figure are 8.2, 6.0, 4.1, 3.4 and 2.7, respectively.

Figs. 1c.i to c.iv show results for a moderate value of  $c_v^0 = c_u^0 = 300$ . For reference, in a single-population (no vaccination) model,  $c = 300$  and  $\gamma = 73$  corresponds to a basic reproduction number  $R_0 = c/\gamma = 4.1$ .

In Fig. 1c.i, when  $m_u = -1$  and  $m_u = -0.5$  (reflecting large and moderate degrees of exclusion and isolation of unvaccinated people) the vaccinated attack rate,  $A_v$  decreases with increasing separation. However, when  $m_u > 0$  (compounding of unvaccinated people) or  $m_u = 0$  (separation has no influence on contact frequency of unvaccinated people), there is a maximum in  $A_v$  for moderate values of  $\eta$ . Therefore, with compounding separation, large values of  $\eta$  are required for  $A_v$  to be lower than its value for no separation ( $\eta = 0$ ). Fig. 1c.ii shows that the unvaccinated attack rate,  $A_u$ , increases with separation for anything other than strong isolating separation ( $m_u$  approaching -1). This produces a maximum in the overall attack rate  $A_t$  at moderate degrees of separation, even for values of  $m_u$  for which  $A_v$  decreases monotonically ( $m_u = -0.5$ ). Fig. 1c.iv shows that  $B_v$ , the share of vaccinated infections that are due to unvaccinated people, has a shape similar to  $A_v(\eta, m_u)$ . In all panels, 20% of the total population is unvaccinated ( $P_v = 0.8$ ; Table 1).

Figs. 1c.i to c.iv therefore demonstrate that whether separation increases or decreases the vaccinated-population attack rate depends on both the degree of separation and how separation affects contact frequency.

Figs. 1a.i to a.iv and 1b.i to b.iv show results for larger  $c_v^0 = c_u^0$ . Compared to Fig. 1c.i,  $A_v$  in Figs. 1a.i and 1b.i does not increase much with  $\eta$  when  $m_u > 0$ , and  $A_v$  no longer has a maximum when  $m_u = 0$ . It can also be seen that  $A_v$  increases with increasing  $c_v^0 = c_u^0$  when there is no separation ( $\eta = 0$ ).

Reducing  $c_v^0 = c_u^0$  (Figs. 1d.i to d.iv and 1e.i to e.iv), decreases  $A_v(\eta = 0)$ , and larger  $\eta$  can dramatically increase  $A_v$ . Even with an isolating separation policy ( $m_u = -0.5$  in Fig. 1d.i),  $A_v$  is increased for moderate values of  $\eta$ .

When  $c_v^0 = c_u^0$  are small enough ( $c_v^0 = c_u^0 = 200$  in Fig. 1e.i, corresponding to  $R_0 = 2.7$  in a single population (no vaccination) model), there is no epidemic among the vaccinated in the absence of separation ( $A_v(\eta = 0) = 0$ ). However, a non-zero vaccinated-population attack rate ( $A_v > 0$ ) occurs if  $\eta$  is sufficiently large, and emerges regardless of whether one isolates or compounds the unvaccinated. Therefore, for small enough values of  $c_v^0 = c_u^0$ , any separation could increase infections among the vaccinated.

The main qualitative features of the above results for  $P_v = 0.8$  hold for other values of  $P_v$ . Appendix 2 provides a detailed exploration of results for  $P_v = 0.1$  through 0.99; and for two values of VE (0.4 and 0.8). When VE is decreased,  $A_v$  is not strongly influenced by  $\eta$ , regardless of  $m_u$ ; therefore, any beneficial effect of separation on  $A_v$  is reduced as VE decreases.

Appendix 2 also explores  $c_v^0 \neq c_u^0$ . For example, when  $c_v^0 > c_u^0$ , the unvaccinated contact frequency is reduced even when there is no separation; increasing  $\eta$  can then increase  $A_v$  substantially compared to the case of  $c_v^0 = c_u^0$ , holding all other parameter values constant (see panels a.i and b.i in Figs. A2.28 and A2.31).

## Interpretation

Separation can have substantially different and negative impacts on the outcome of an epidemic, depending on the type and degree of separation, and depending on cultural and population-density factors, for example, that co-determine  $c_v^0$  and  $c_u^0$ .

Separation that compounds the unvaccinated ( $m_u > 0$  and  $m_v = 0$ ) generally causes an increase in the vaccinated-population attack rate,  $A_v$ , for small and intermediate degrees of separation,  $\eta$ , while for large  $\eta$ ,  $A_v$  decreases below its value in an unseparated society. Separation that isolates and excludes the unvaccinated ( $m_u < 0$  and  $m_v = 0$ ) decreases  $A_v$  for “more contagious viruses” (i.e. large  $c_v^0 = c_u^0$ , large  $R_0$ ); however, for “less contagious viruses” (smaller  $c_v^0 = c_u^0$ , smaller  $R_0$ ), both isolating and compounding types of separation can increase  $A_v$  beyond its value in an unseparated society. For “viruses that are not very contagious” (small  $c_v^0 = c_u^0$ , small  $R_0$ ), applying separation can cause a sizeable epidemic among the vaccinated even though virtually no vaccinated people would be infected in an unseparated society. Separation increases the unvaccinated attack rate,  $A_u$ , for compounding and moderately isolating types of separation, and  $A_u$  is only decreased for strongly isolating separation ( $m_u$  approaching -1).

Except for large negative values of  $m_u$ , applying separation has the effect of increasing the overall probability of a susceptible-infectious interaction, since the unvaccinated population has a higher fraction of susceptibles. This creates a form of core group dynamics [22-24]. At the same time, increasing separation shields the vaccinated population from the increased prevalence of infection in the unvaccinated population. This trade-off causes the non-monotonic relationship between  $A_v$  and  $\eta$ . The same dynamic causes the emergence of an epidemic for large  $\eta$  when  $c_v^0 = c_u^0$  (and thus  $R_0$ ) is small.

We find that  $B_v$ , the share of vaccinated infections that are due to contact with unvaccinated people, follows a similar trend to  $A_v$  as a function of the degree of separation, when separation has no impact on the vaccinated contact frequency ( $m_v = 0$ ). For this type of separation,  $A_v$  and  $B_v$  either increase or decrease simultaneously with increasing  $\eta$ , depending on the value of  $m_u$ , and  $B_v$  is minimized for complete separation.



In contrast, when  $m_v \neq 0$ , such that separation affects the contact frequencies of vaccinated people, increasing separation can cause  $A_v$  to increase while  $B_v$  decreases and vice-versa (see Appendix 2, Figs. A2.25 and A2.26).

The impact of separation on contact frequencies has not previously been considered to our knowledge, including in network-based models in which unvaccinated people cluster together in “cliques” or households [25-27].

## Limitations

Our model assumes only two risk populations (vaccinated and unvaccinated), considers only the attack rates on epidemic completion ( $A_v$  and  $A_u$ ), and takes the degree of separation  $\eta$  to be time-independent, without variation due to public holidays and such. It does not consider other outcomes such as death or hospitalization. Our model assumes an all-or-nothing VE, without waning immunity or influence on infectiousness; and no possibility of reinfection. SIR models and their variations are based on the paradigm of transmission due to pairwise contact between a recently infected and a susceptible individual. However, this paradigm is unable to account for important features of viral respiratory disease incidence, in particular its rapid emergence and disappearance occurring at essentially the same time at widely dispersed locations [28]. Air-borne transmission via suspended aerosol particles is not directly compatible with pairwise transmission, since it occurs in built environments where many people may transit or be present [29]. A related and unavoidable limitation is the lack of reliable empirical evaluations of needed infectious contact frequencies, which is important because our calculated outcomes are sensitive to the chosen contact frequency values.

## Conclusion

Vaccination-status-based societal separation can lead to substantially different and counter-intuitive epidemic outcomes depending on the type and degree of separation. Negative epidemiological consequences can occur for either separated group, irrespective of the expected deleterious health impacts of the separation policies themselves [30-32].

## References

1. Nold A. Heterogeneity in Disease-Transmission Modeling. *Math Biosci.* 1980;52: 227-240.
2. Garnett GP, Anderson RM. Balancing sexual partnerships in an age and activity stratified model of HIV transmission in heterosexual populations. *IMA J Math App Med Biol.* 1994;11: 161-192.
3. Garnett GP, Anderson RM. Sexually Transmitted Diseases and Sexual Behavior: Insights from Mathematical Models. *J Infect Dis.* 1996;174: S150-S161.

4. Siegenfeld AF, Taleb NN, Bar-Yam, Y. What models can and cannot tell us about COVID-19. *Proc Nat Acad Sci*. 2020;117: 16092-16095.
5. Hethcote HW. *The Mathematics of Infectious Diseases*. SIAM Rev. 2000;42: 599-653.
6. Keeling MJ, Rohani P. *Modeling Infectious Diseases in Humans and Animals*. Princeton: Princeton University Press; 2008.
7. Martcheva M. *An Introduction to Mathematical Epidemiology*. New York: Springer; 2015.
8. Fisman DN, Amoako A., Tuite AR. Impact of population mixing between vaccinated and unvaccinated subpopulations on infectious disease dynamics: implications for SARS-CoV-2 transmission. *Can Med Assoc J*. 2022;194: E573-80.
9. Virk N. Epidemic modeling of a simple respiratory pathogen. M. Sc. Thesis, University of British Columbia. 2022. Available from: <https://dx.doi.org/10.14288/1.0417535>.
10. Kosinski RJ. The Failures of an Ideal COVID-19 Vaccine: A Simulation Study. medRxiv [Preprint]. 2021 [cited 2023 Jun 1]. Available from: <https://doi.org/10.1101/2021.11.22.21266669>.
11. Morris M. A Log-Linear Modeling Framework for Selective Mixing. *Math Biosci*. 1991;107: 349-377.
12. Voo TC, Savulescu J, Schaefer O, et al. COVID-19 differentiated measures for unvaccinated individuals: The need for clear goals and strong justifications. *Vaccine*. 2022;40: 5333-5337.
13. Ward JK, Gauna F, Gagneux-Brunon A, et al. The French health pass holds lessons for mandatory COVID-19 vaccination. *Nat Med*. 2022;28: 232-235.
14. Wang B, Ping Y. A comparative analysis of COVID-19 vaccination certificates in 12 countries/regions around the world: Rationalising health policies for international travel and domestic social activities during the pandemic. *Health Pol*. 2022;126: 755-762.
15. Bardosh K, de Figueiredo A, Gur-Arie R, et al. The unintended consequences of COVID-19 vaccine policy: why mandates, passports and restrictions may cause more harm than good. *BMJ Glob. Health*. 2022;7: e008684.
16. Government of Canada. COVID-19 Designated Quarantine Facilities: Staying at the facility. 2023 May 3 [Cited 2023 May 25]. Available from: <https://travel.gc.ca/travel-covid/travel-restrictions/isolation/designated-quarantine-facilities#archived> [Alternate link: <https://archive.is/zvHne>].

17. Harris S, Travelling to or within Canada? The rules have changed. Here's what you need to know. CBC News. 2021 Jul 19 [Cited 2023 May 25]. Available from: <https://www.cbc.ca/news/business/travel-rules-canada-government-1.6105707> [Alternate link: <https://archive.is/xqnIQ>].
18. Hewson G, Robinson L. Queensland's Wellcamp COVID quarantine facility to take first arrivals this weekend. ABC News. 2022 Feb 4 [Cited 2023 May 25]. Available from: <https://www.abc.net.au/news/2022-02-04/covid-queensland-wellcamp-quarantine-facility-first-guests/100804636> [Alternate link: <https://archive.is/vk3ks>].
19. Looi M-K. Vaccine passports around the world. *BMJ*. 2021;374: n2142.
20. Wölfel R, Corman VM, Guggemos W, et al. Virological assessment of hospitalized patients with COVID-2019. *Nature*. 2020;581: 465-469.
21. Centers for Disease Control and Prevention. Isolation and Precautions for People with COVID-19. 2023 May 11 [Cited 2023 May 20]. Available from: <https://www.cdc.gov/coronavirus/2019-ncov/your-health/isolation.html>.
22. Haderler KP, Castillo-Chavez C. A Core Group Model for Disease Transmission. *Math Biosci*. 1995;128: 41-55.
23. Boily M-C, Lowndes C, Alary M. The impact of HIV epidemic phases on the effectiveness of core group interventions: insights from mathematical models. *Sex Transm Infect*. 2002;78: i78-i90.
24. Brauer F, Castillo-Chavez C, Feng Z. *Mathematical Models in Epidemiology*. New York: Springer; 2019. Chapter 5, Models with Heterogeneous Mixing; p. 179-225.
25. Salathé M, Bonhoeffer S. The effect of opinion clustering on disease outbreaks. *J R Soc Interface*. 2008;5: 1505-1508.
26. De-Leon H, Aran D. Over- and under-estimation of vaccine effectiveness. medRxiv [Preprint]. 2022 [posted 2022 Jan 25; revised 2023 Feb 6; cited 2023 Jun 1]. Available from: <https://doi.org/10.1101/2022.01.24.22269737>.
27. Achitouv I. Propagation of epidemics in a polarized society: impact of clustering among unvaccinated individuals. arXiv: 2206.00357 [Preprint]. 2022 [cited 2023 Jun 1]. Available from: <https://doi.org/10.48550/arXiv.2206.00357>.
28. Hope-Simpson RE. *The Transmission of Epidemic Influenza*. New York: Springer; 1992.
29. Bulfone TC, Malekinejad M, Rutherford GW, et al. Outdoor Transmission of SARS-CoV-2 and Other Respiratory Viruses: A Systematic Review. *J Infect Dis*. 2021;223: 550-561.

30. Cohen S. Social relationships and health. *Amer Psych*. 2004;59: 676-684.

31. Cohen S, Tyrell DAJ, Smith AP. Psychological stress and susceptibility to the common cold. *New Eng J Med*. 1991;325: 606-612.

32. Cohen S, Doyle WJ, Skoner DP. Social Ties and Susceptibility to the Common Cold. *J Amer Med Assoc*. 1997;277: 1940-1944.

## Appendix 1: Elaboration of the model

This is Appendix 1 of the pre-print “Compartmental mixing models for vaccination-status-based societal separation regarding viral respiratory diseases” by J. Hickey & D.G. Rancourt, uploaded to <https://www.medrxiv.org/> on 2023-07-05 (Version 3).

### Table of Contents

|                                                                      |   |
|----------------------------------------------------------------------|---|
| A1.1: Model differential equations and “mixing” rule.....            | 1 |
| A1.2: Variation of contact frequency with degree of separation ..... | 2 |
| A1.3: Quantities calculated from simulation results .....            | 4 |

### A1.1: Model differential equations and “mixing” rule

The model is a susceptible-infectious-recovered (SIR) model with two populations: vaccinated (subscript  $v$ ) and unvaccinated (subscript  $u$ ) people, consisting of the following six differential equations:

$$\frac{dS_u}{dt} = -c_u\beta_u S_u \left[ f_{uv} \frac{I_v}{N_v} + f_{uu} \frac{I_u}{N_u} \right] \quad (\text{A1.a})$$

$$\frac{dI_u}{dt} = c_u\beta_u S_u \left[ f_{uv} \frac{I_v}{N_v} + f_{uu} \frac{I_u}{N_u} \right] - \gamma_u I_u \quad (\text{A1.b})$$

$$\frac{dR_u}{dt} = \gamma_u I_u \quad (\text{A1.c})$$

$$\frac{dS_v}{dt} = -c_v\beta_v S_v \left[ f_{vu} \frac{I_u}{N_u} + f_{vv} \frac{I_v}{N_v} \right] \quad (\text{A1.d})$$

$$\frac{dI_v}{dt} = c_v\beta_v S_v \left[ f_{vu} \frac{I_u}{N_u} + f_{vv} \frac{I_v}{N_v} \right] - \gamma_v I_v \quad (\text{A1.e})$$

$$\frac{dR_v}{dt} = \gamma_v I_v \quad (\text{A1.f})$$

$S_u$ ,  $I_u$ , and  $R_u$  represent the number of susceptible, infectious, and recovered unvaccinated people, at time  $t$ .  $N_u$  represents the total number of unvaccinated people.  $c_u$  represents the contact frequency (number of contacts per unit time) of unvaccinated people.  $\beta_u$  is the probability that a susceptible unvaccinated person becomes infected upon contact with an infectious person (regardless of whether the infectious person is vaccinated or unvaccinated).  $\gamma_u$  is the rate at which infected unvaccinated people recover from infection. The quantities  $S_v$ ,  $I_v$ ,  $R_v$ ,  $N_v$ ,  $c_v$ ,  $\beta_v$ , and  $\gamma_v$  are defined equivalently, for vaccinated people.

There are thus two “ $\beta$  parameters”, two “ $c$  parameters” and two “ $\gamma$  parameters” in our model. Since each  $\beta$  parameter always occurs as part of a product with its respective  $c$  parameter, the  $\beta$  parameters can freely be set equal to 1: this imposes that the “contacts” considered in the model are, by definition, only those contacts that are of sufficiently close proximity and long duration that an infection is guaranteed to occur when a susceptible and an infectious person meet. We set  $\beta_v = \beta_u = 1$  in the main text, without any loss of generality.

$f_{ij}$  is the probability that a person of type  $i$  (either  $u$  or  $v$ ) has a contact with a person of type  $j$  (either  $u$  or  $v$ ), and is defined as follows:

$$f_{ij} = \eta \delta_{ij} + (1 - \eta) \frac{c_j N_j}{\sum_{k \in \{u,v\}} c_k N_k} \quad (\text{A2})$$

where  $0 \leq \eta \leq 1$  and  $\delta_{ij}$  is the Kronecker delta, such that  $\delta_{uu} = \delta_{vv} = 1$  and  $\delta_{uv} = \delta_{vu} = 0$ .  $\eta$  is therefore a parameter that controls the degree of separation between the  $u$  and  $v$  sub-populations. For example, when  $\eta = 1$ , then  $f_{uu} = f_{vv} = 1$  and  $f_{uv} = f_{vu} = 0$ , such that  $u$  people only ever have contacts with other  $u$  people and likewise for  $v$  people (complete separation). At the other extreme, when  $\eta = 0$ , then the probability that a  $u$  person has a contact with a  $v$  person is entirely determined by the relative proportions of  $u$  and  $v$  people, weighted by their respective contact frequencies (no separation, or “random mixing”).

### A1.2: Variation of contact frequency with degree of separation

To allow contact frequency to vary with degree of separation, we define:

$$c_u = c_u^0 (1 + \eta m_u) \quad (\text{A3.a})$$

$$c_v = c_v^0 (1 + \eta m_v), \quad (\text{A3.b})$$

where  $c_v^0$  and  $c_u^0$  represent the contact frequencies for unvaccinated and vaccinated people when there is no separation ( $\eta = 0$ ), and  $m_u \geq -1$  and  $m_v \geq -1$  are two parameters that control how non-zero separation impacts the contact frequencies of unvaccinated and vaccinated people.

Fig. A1.1 shows  $c_u$  as a function of  $\eta$ , for different values of the parameter  $m_u$  and for  $c_u^0 = 1$ . As can be seen, when  $m_u = 0$ ,  $c_u = c_u^0 = 1$ , such that the contact frequency is constant regardless of the degree of separation.

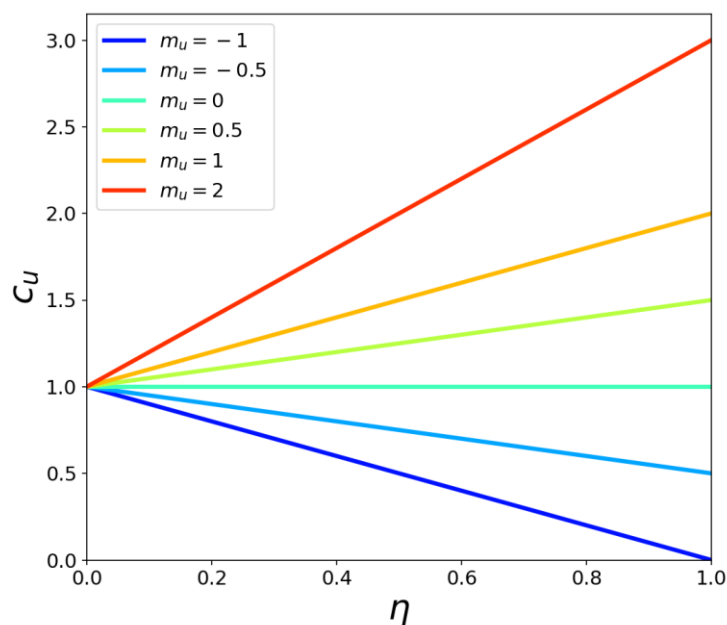

Fig. A1.1: Variation of the unvaccinated contact frequency,  $c_u$ , with degree of separation,  $\eta$ , for various values of the parameter  $m_u$ .  $c_u^0 = 1$  in the figure.

When  $m_u < 0$ , the contact frequency of unvaccinated people decreases with increasing  $\eta$ . This represents a separation policy that excludes unvaccinated people from public spaces while also isolating them from themselves to some degree. For example, a pair of intermediate values of  $m_u < 0$  and  $0 < \eta < 1$  could represent a separation policy (such as with “vaccination passports”) that excludes unvaccinated people from recreational venues like restaurants and cinemas but not more essential services such as grocery stores and hospitals. On the other hand, in the extreme case of  $m_u = -1$  and  $\eta = 1$ ,  $c_u = 0$  such that unvaccinated people are completely separated and isolated, having no contacts with anyone.

When  $m_u > 0$ , the contact frequency of unvaccinated people increases with increasing  $\eta$ . This represents a separation policy that compounds unvaccinated people by placing them together in close quarters, for example in designated facilities for returning unvaccinated travelers.

Via the two parameters  $m_u$  and  $\eta$ , the model therefore spans the full range of contact frequencies, from  $c_u = 0$  in the isolating extreme of  $m_u = -1$  and  $\eta = 1$  to arbitrarily high contact frequency in the compounding extreme with  $\eta = 1$  and a  $m_u > 0$ .

The impact of separation on the vaccinated sub-population is independently controlled via the parameters  $c_v^0$  and  $m_v$ .

### A1.3: Quantities calculated from simulation results

The attack rate among the vaccinated population,  $A_v$ , is defined as the proportion of initially-susceptible vaccinated people who become infected during the epidemic (Eq. 1 of the main text, reproduced below):

$$A_v = (S_v(t_0) - S_v(t_f))/S_v(t_0), \quad (\text{A4})$$

where  $S_v(t_0)$  is the number of susceptible vaccinated people at the beginning of the epidemic and  $S_v(t_f)$  is the number of susceptible vaccinated people remaining once there are no longer any infectious people in the entire (vaccinated and unvaccinated) population.  $A_u$  is defined equivalently, for the unvaccinated.

The quantity  $B_v$  is equal to the share of infections among vaccinated people that were due to contacts with infectious unvaccinated people, i.e.:

$$B_v = \frac{\int_{t_0}^{t_f} c_v \beta_v S_v \left( f_{vu} \frac{I_u}{N_u} \right) dt}{\int_{t_0}^{t_f} c_v \beta_v S_v \left( f_{vu} \frac{I_u}{N_u} + f_{vv} \frac{I_v}{N_v} \right) dt} \quad (\text{A5})$$

Similarly,  $B_u$  represents the share of infections among unvaccinated people that were due to contacts with infectious vaccinated people, and is defined in the same way as  $B_v$ , (interchanging the  $v$  and  $u$  subscripts in Eq. A5).



## Appendix 2: Supplementary figures

This is Appendix 2 of the pre-print “Compartmental mixing models for vaccination-status-based societal separation regarding viral respiratory diseases” by J. Hickey & D.G.

medRxiv preprint doi: <https://doi.org/10.1101/2022.08.21.22279035>; this version posted July 6, 2023. The copyright holder for this preprint (which was not certified by peer review) is the author/funder, who has granted medRxiv a license to display the preprint in perpetuity. It is made available under a [CC-BY 4.0 International license](https://creativecommons.org/licenses/by/4.0/).

### Table of Contents

|                                                                          |    |
|--------------------------------------------------------------------------|----|
| A2.1: Epidemic curves.....                                               | 2  |
| A2.2: Epidemic outcomes for different values of $P_v$ .....              | 7  |
| A2.2.1: VE = 0.8.....                                                    | 7  |
| A2.2.2: VE = 0.4.....                                                    | 16 |
| A2.3: Epidemic outcomes for different values of $m_v$ .....              | 25 |
| A2.4: Epidemic outcomes for different values of $c_v^0 \neq c_u^0$ ..... | 28 |
| A2.4.1: Fixed $c_v^0$ , vary $c_v^0/c_u^0$ .....                         | 28 |
| A2.4.2: Fixed weighted sum $P_v c_v^0 + (1 - P_v)c_u^0$ .....            | 31 |

## A2.1: Epidemic curves

$$P_v = 0.8, VE = 0.8, NI = 0.2, m_v = 0, c_v^0 = c_u^0 = 600, \gamma = 73$$

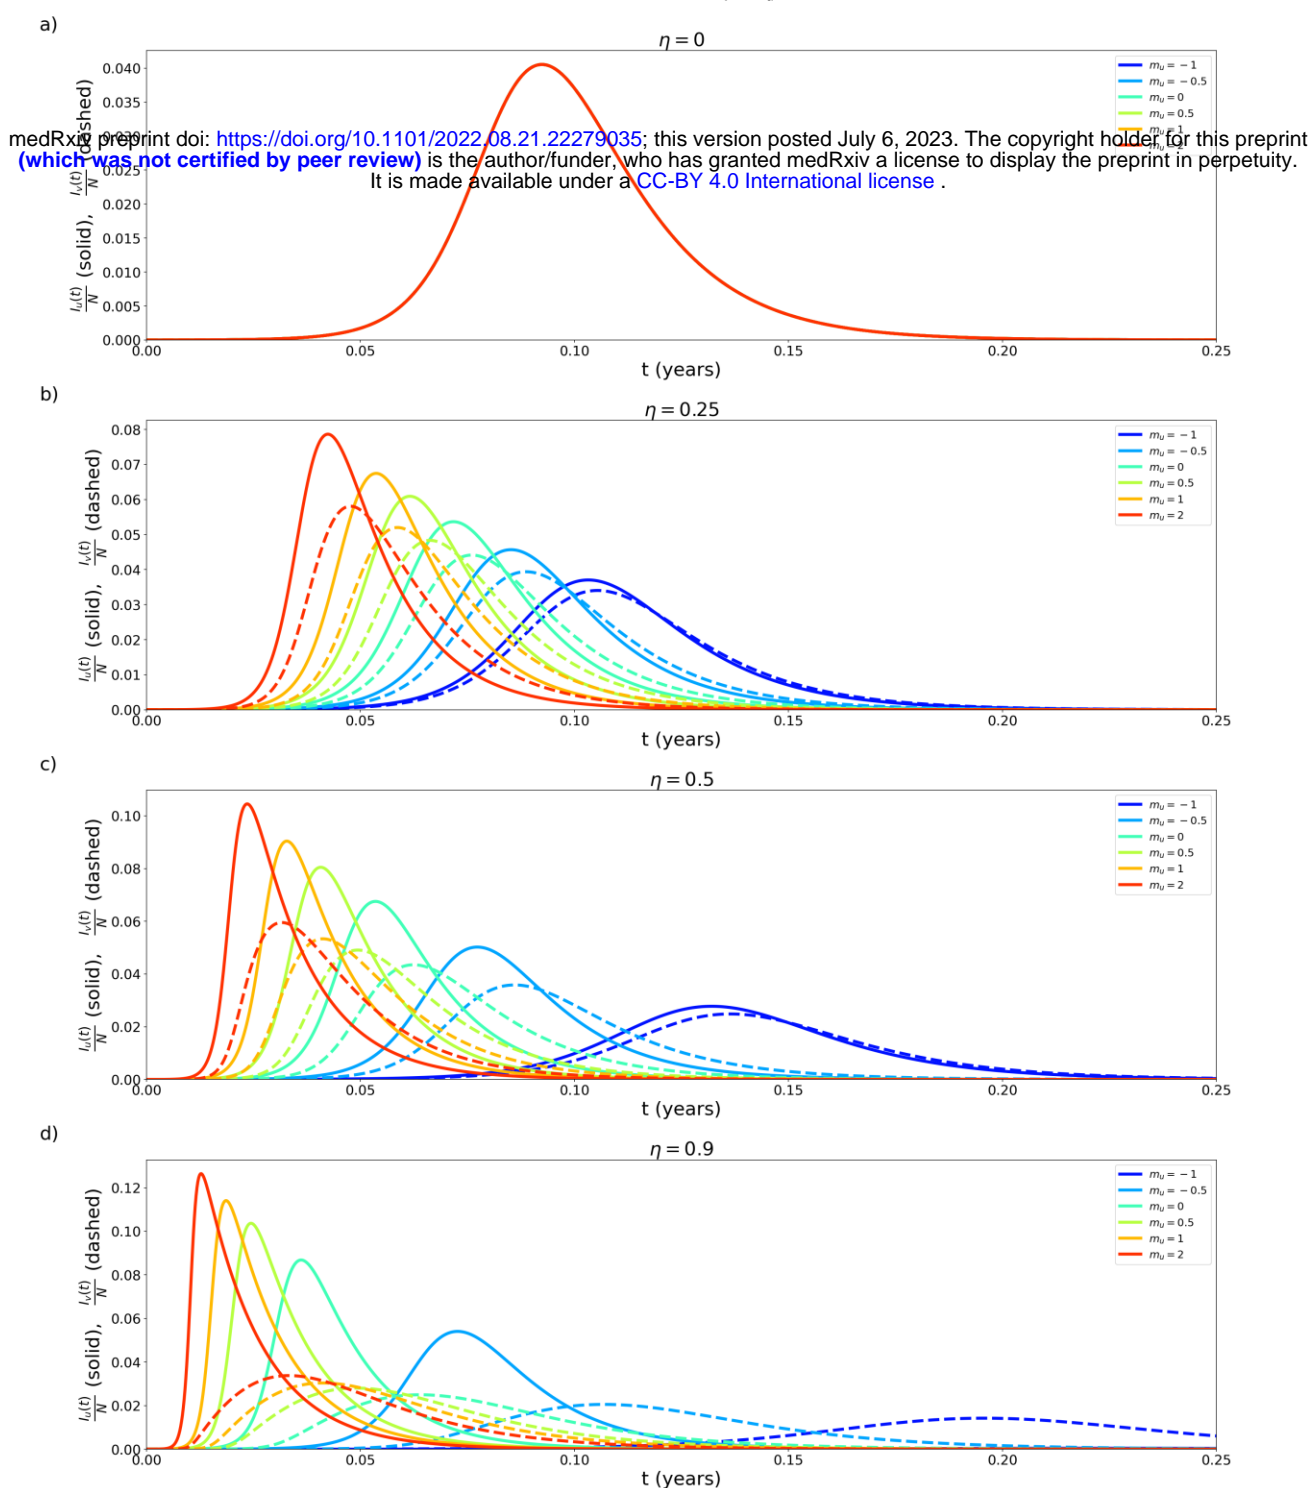

Fig. A2.1: Population fraction of infectious individuals as a function of time, for the vaccinated (solid lines) and unvaccinated (dashed lines) populations, for parameters  $P_v = 0.8$ ,  $VE = 0.2$ ,  $NI = 0.2$ ,  $m_v = 0$ ,  $c_v^0 = c_u^0 = 600$ ,  $\gamma = 73$ . Each panel (a-d) shows a different value of  $\eta$ , and each coloured line is for a different value of  $m_u$ , as indicated in the legend.

$$P_v = 0.8, VE = 0.8, NI = 0.2, m_v = 0, c_v^0 = c_u^0 = 437, \gamma = 73$$

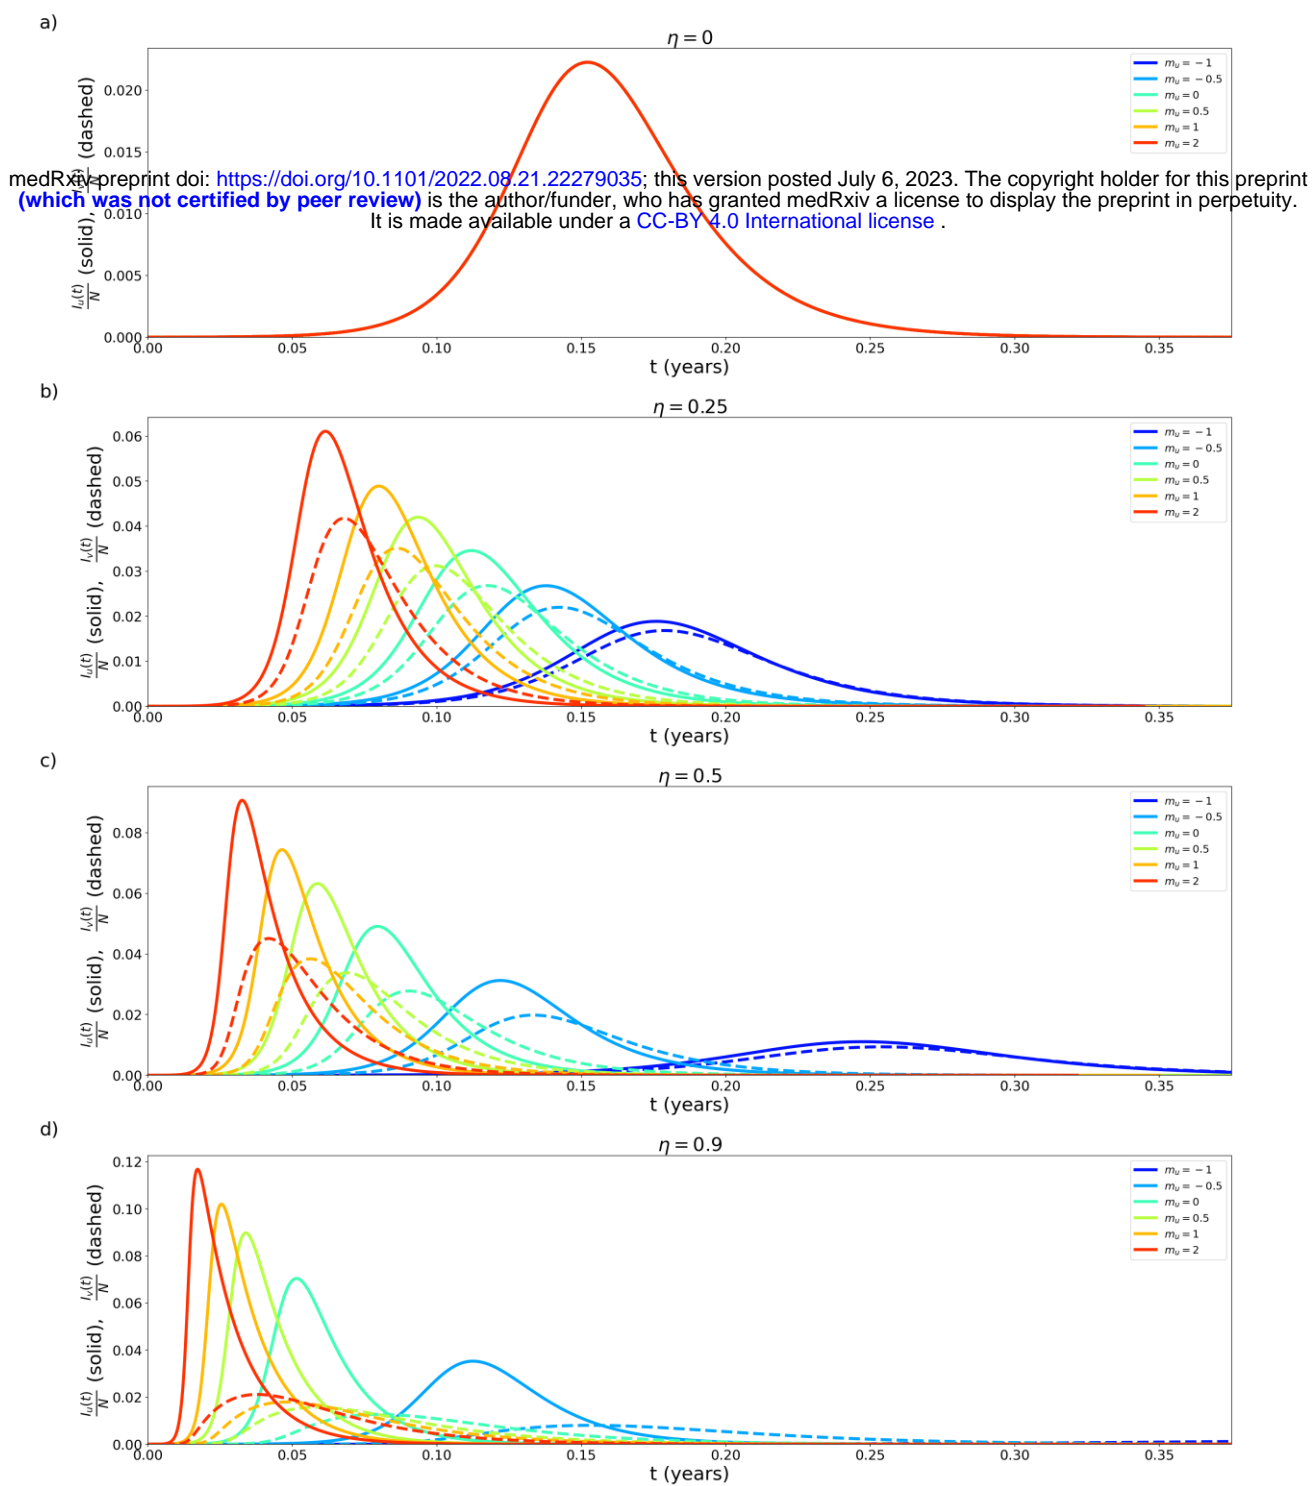

Fig. A2.2: Same as Fig. A2.1, except that  $c_v^0 = c_u^0 = 437$ .

$$P_v = 0.8, VE = 0.8, NI = 0.2, m_v = 0, c_v^0 = c_u^0 = 300, \gamma = 73$$

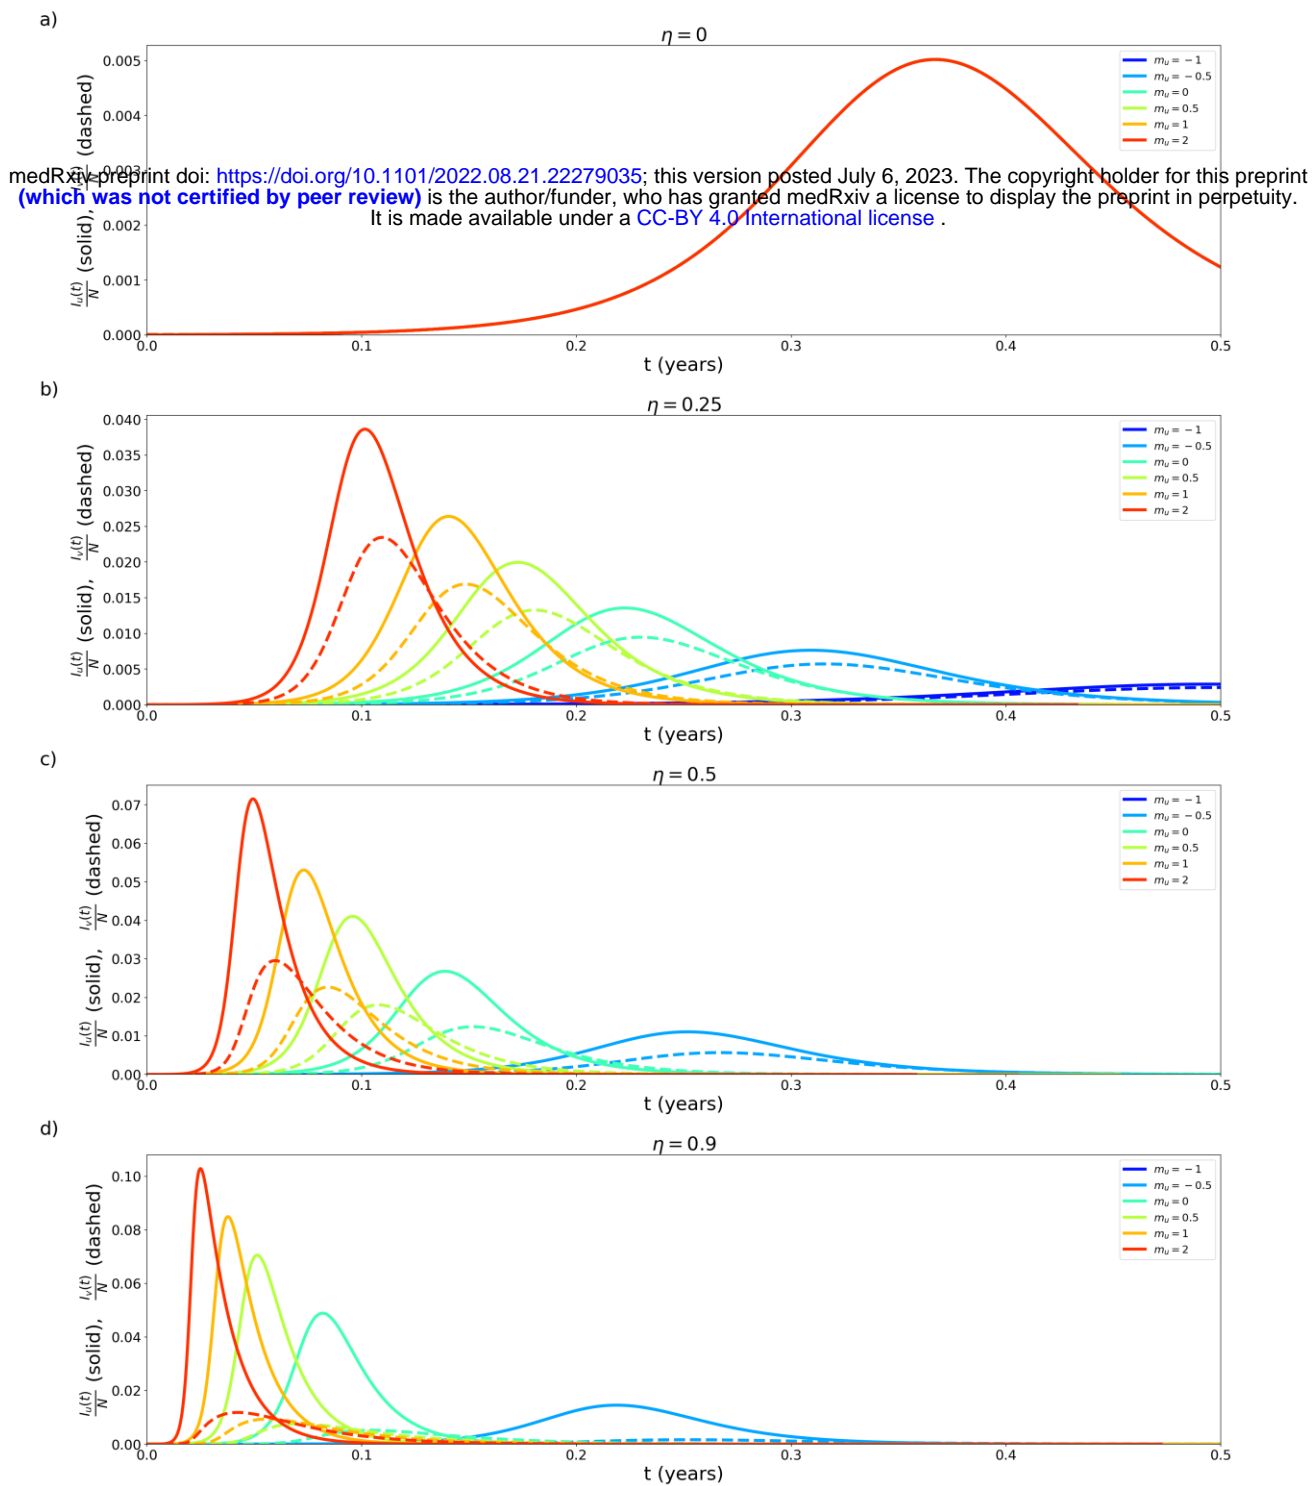

Fig. A2.3: Same as Fig. A2.1, except that  $c_v^0 = c_u^0 = 300$ .

$$P_V = 0.8, VE = 0.8, NI = 0.2, m_V = 0, c_V^0 = c_U^0 = 250, \gamma = 73$$

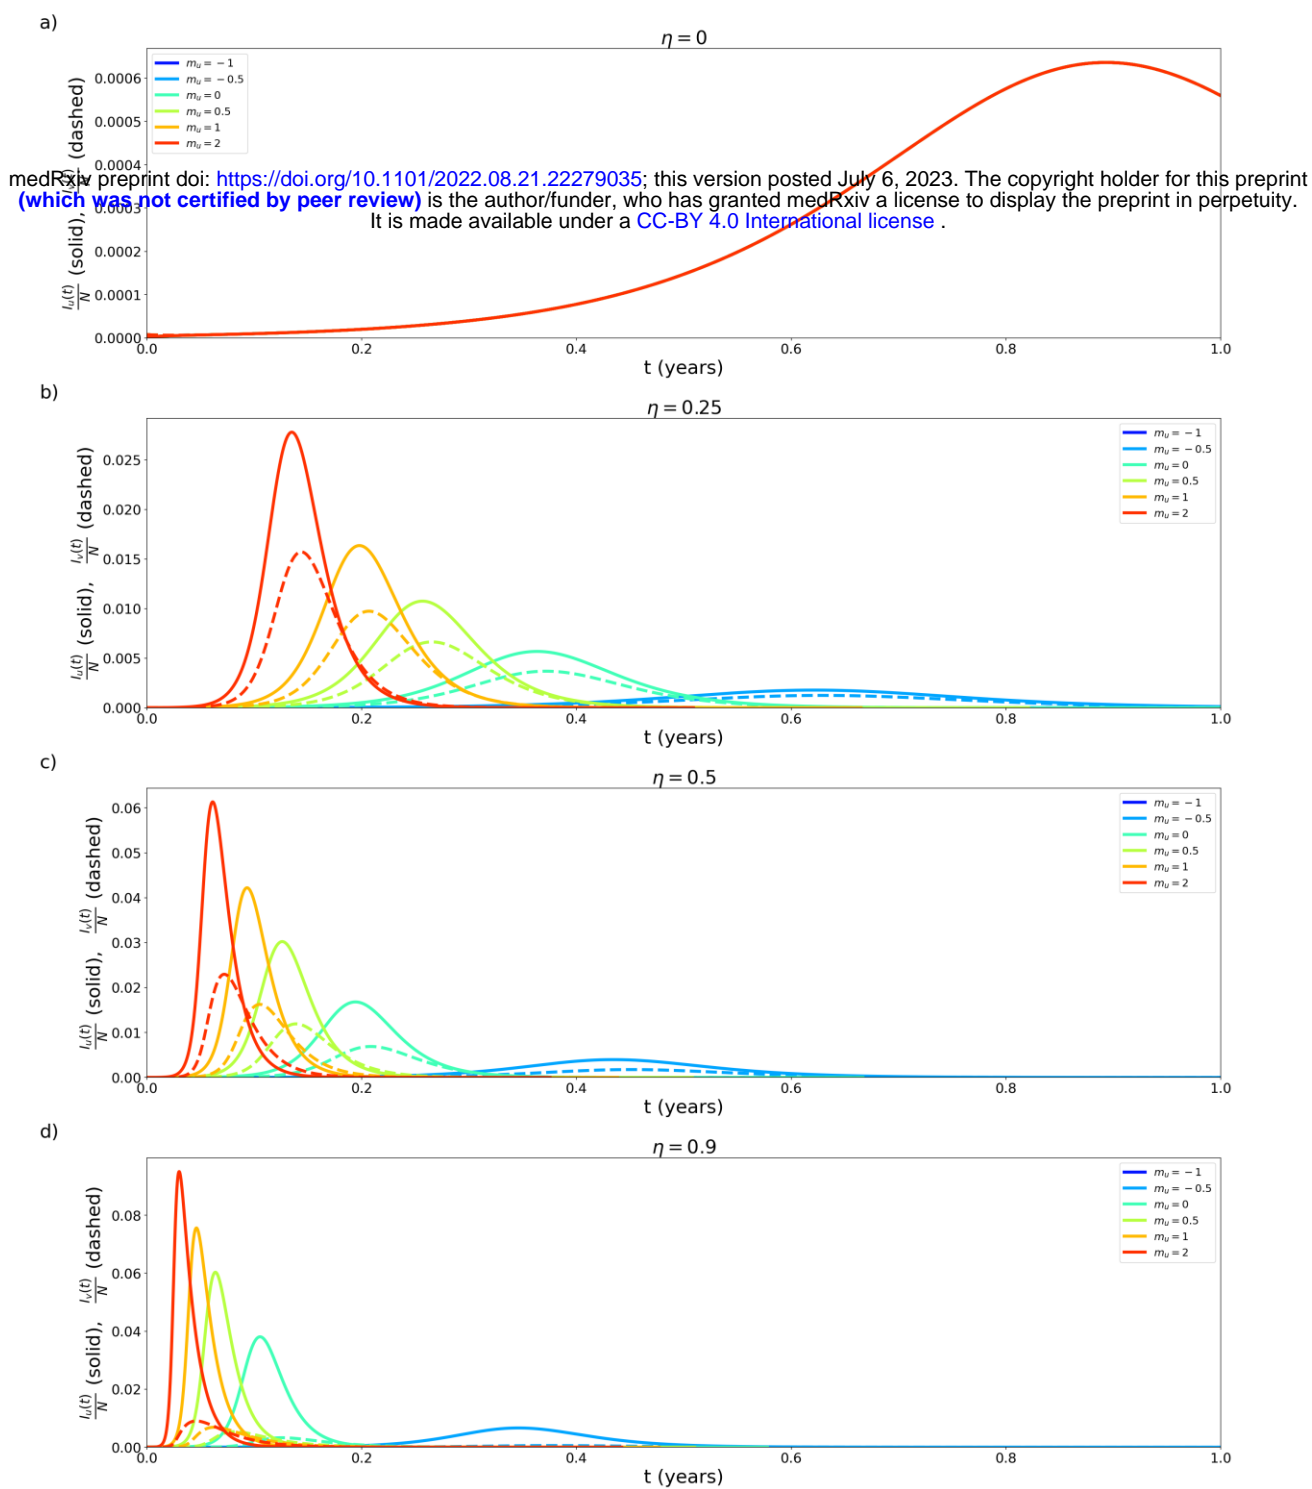

Fig. A2.4: Same as Fig. A2.1, except that  $c_V^0 = c_U^0 = 250$ .

$$P_V = 0.8, VE = 0.8, NI = 0.2, m_V = 0, c_V^0 = c_U^0 = 200, \gamma = 73$$

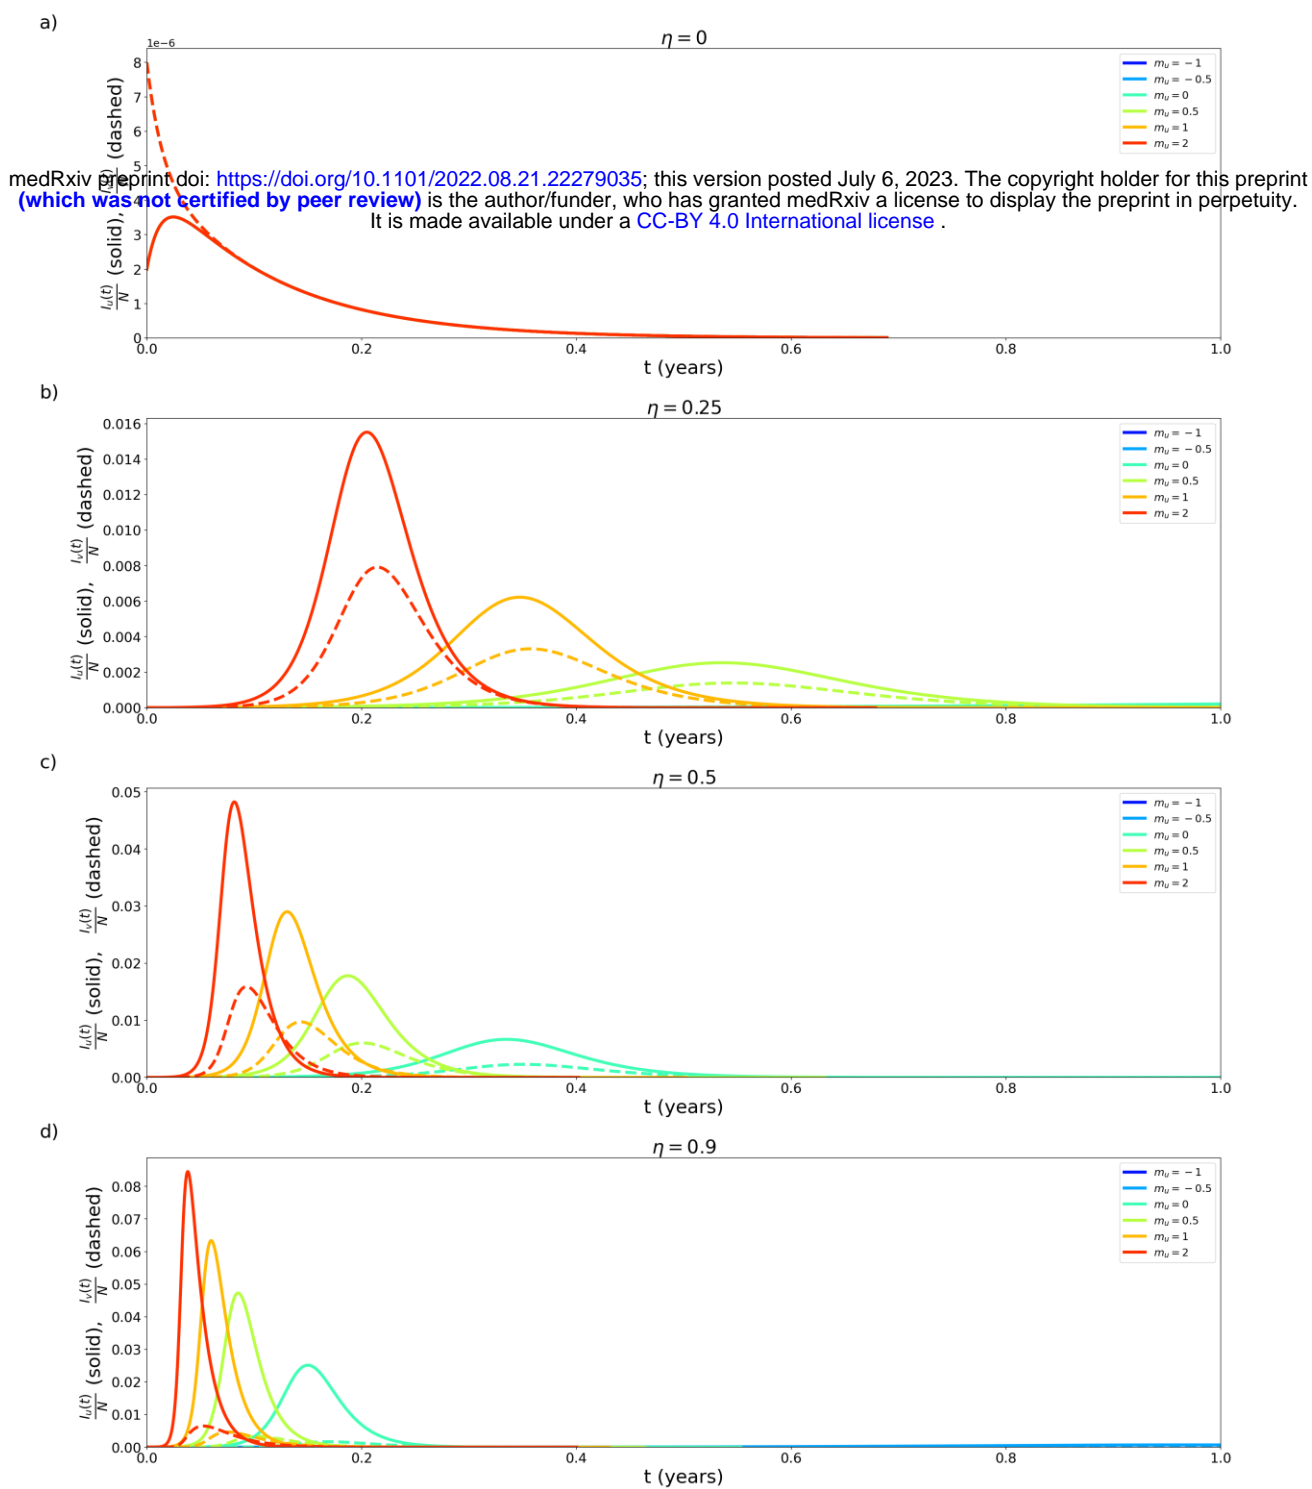

Fig. A2.5: Same as Fig. A2.1, except that  $c_V^0 = c_U^0 = 200$ .

## A2.2: Epidemic outcomes for different values of $P_v$

### A2.2.1: $VE = 0.8$

medRxiv preprint doi: <https://doi.org/10.1101/2022.08.21.22279035>; this version posted July 6, 2023. The copyright holder for this preprint (which was not certified by peer review) is the author/funder, who has granted medRxiv a license to display the preprint in perpetuity. It is made available under a [CC-BY 4.0 International license](#).

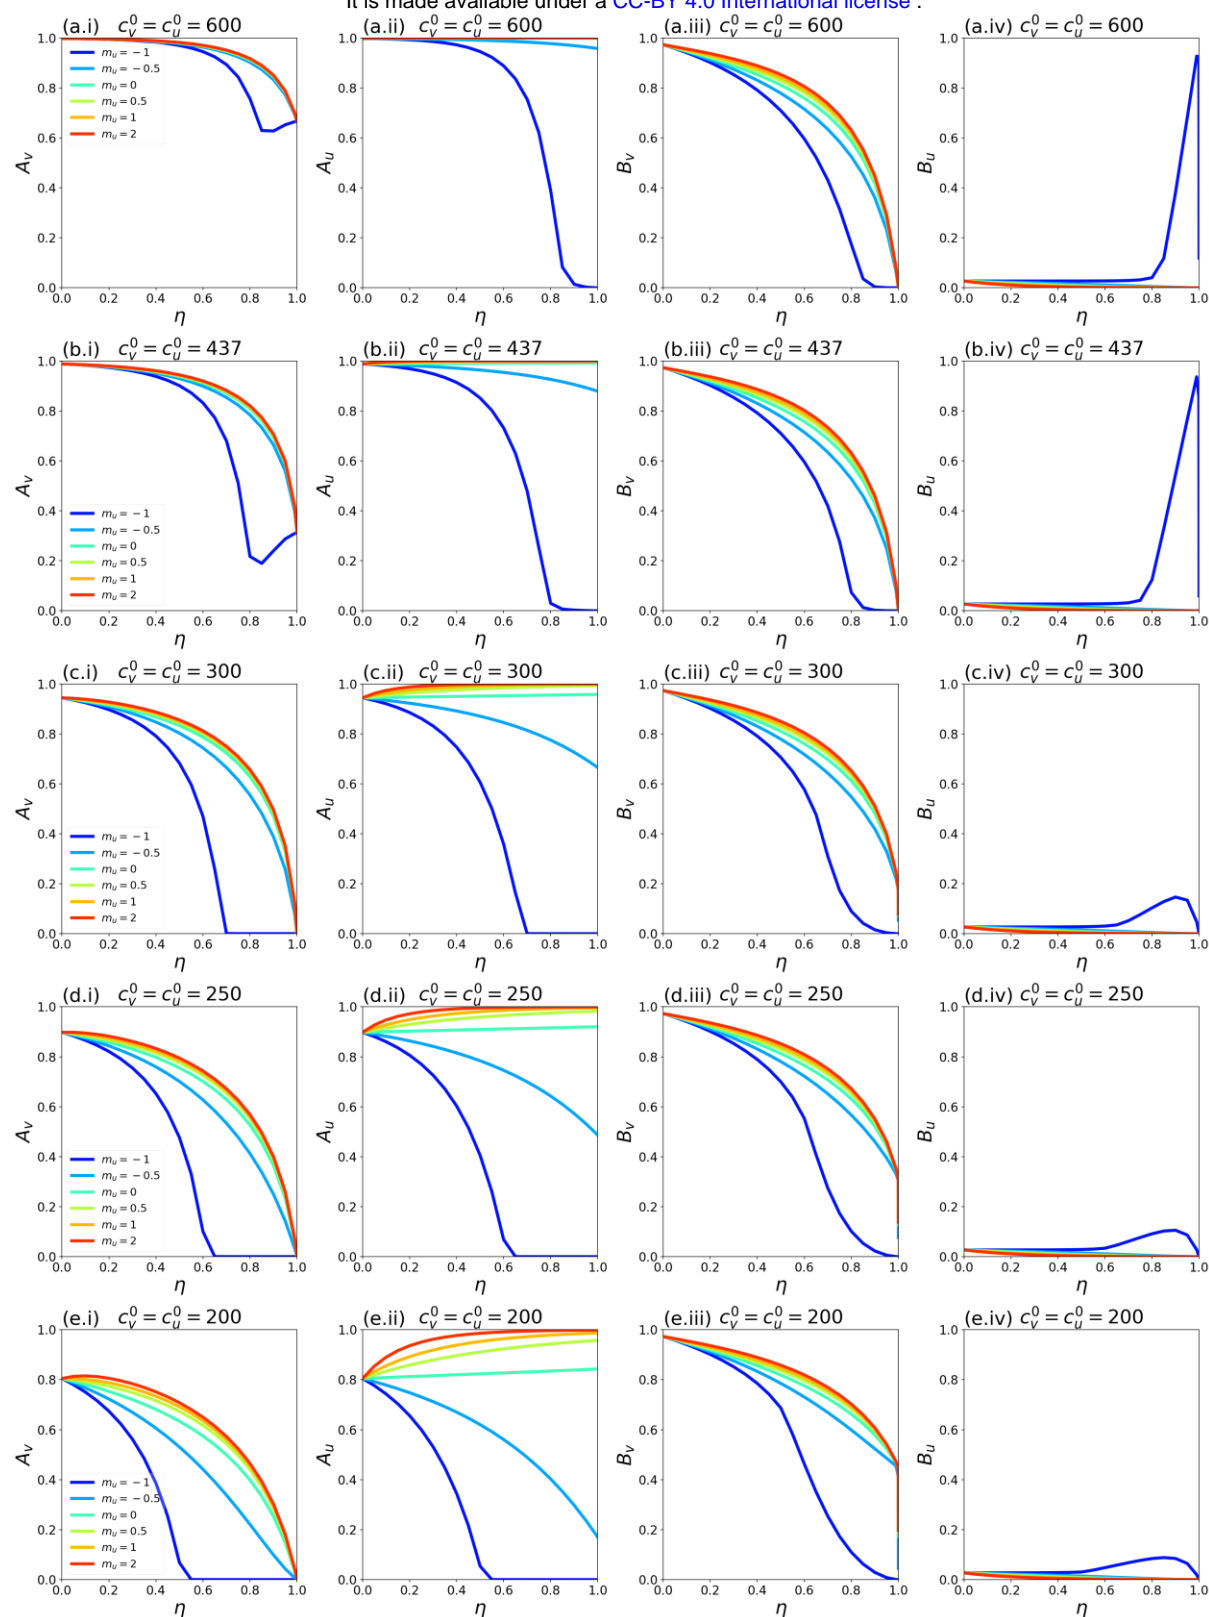

Fig. A2.6:  $A_v$ ,  $A_u$ ,  $B_v$ , and  $B_u$  as functions of  $\eta$ . Each row of panels corresponds to a choice of  $c_v^0 = c_u^0$ , and each coloured line to a choice of  $m_u$  as indicated in the legends. For reference, in a single-population (no vaccination) model, the corresponding  $R_0$  values for rows a-e of the figure are 8.2, 6.0, 4.1, 3.4 and 2.7, respectively. Parameter values  $P_v = 0.1$ ,  $VE = 0.8$ ,  $NI = 0.2$ ,  $m_v = 0$ ,  $\gamma = 73$ .

$P_v=0.25, V_E=0.8, N_I=0.2, m_v=0, \gamma=73$

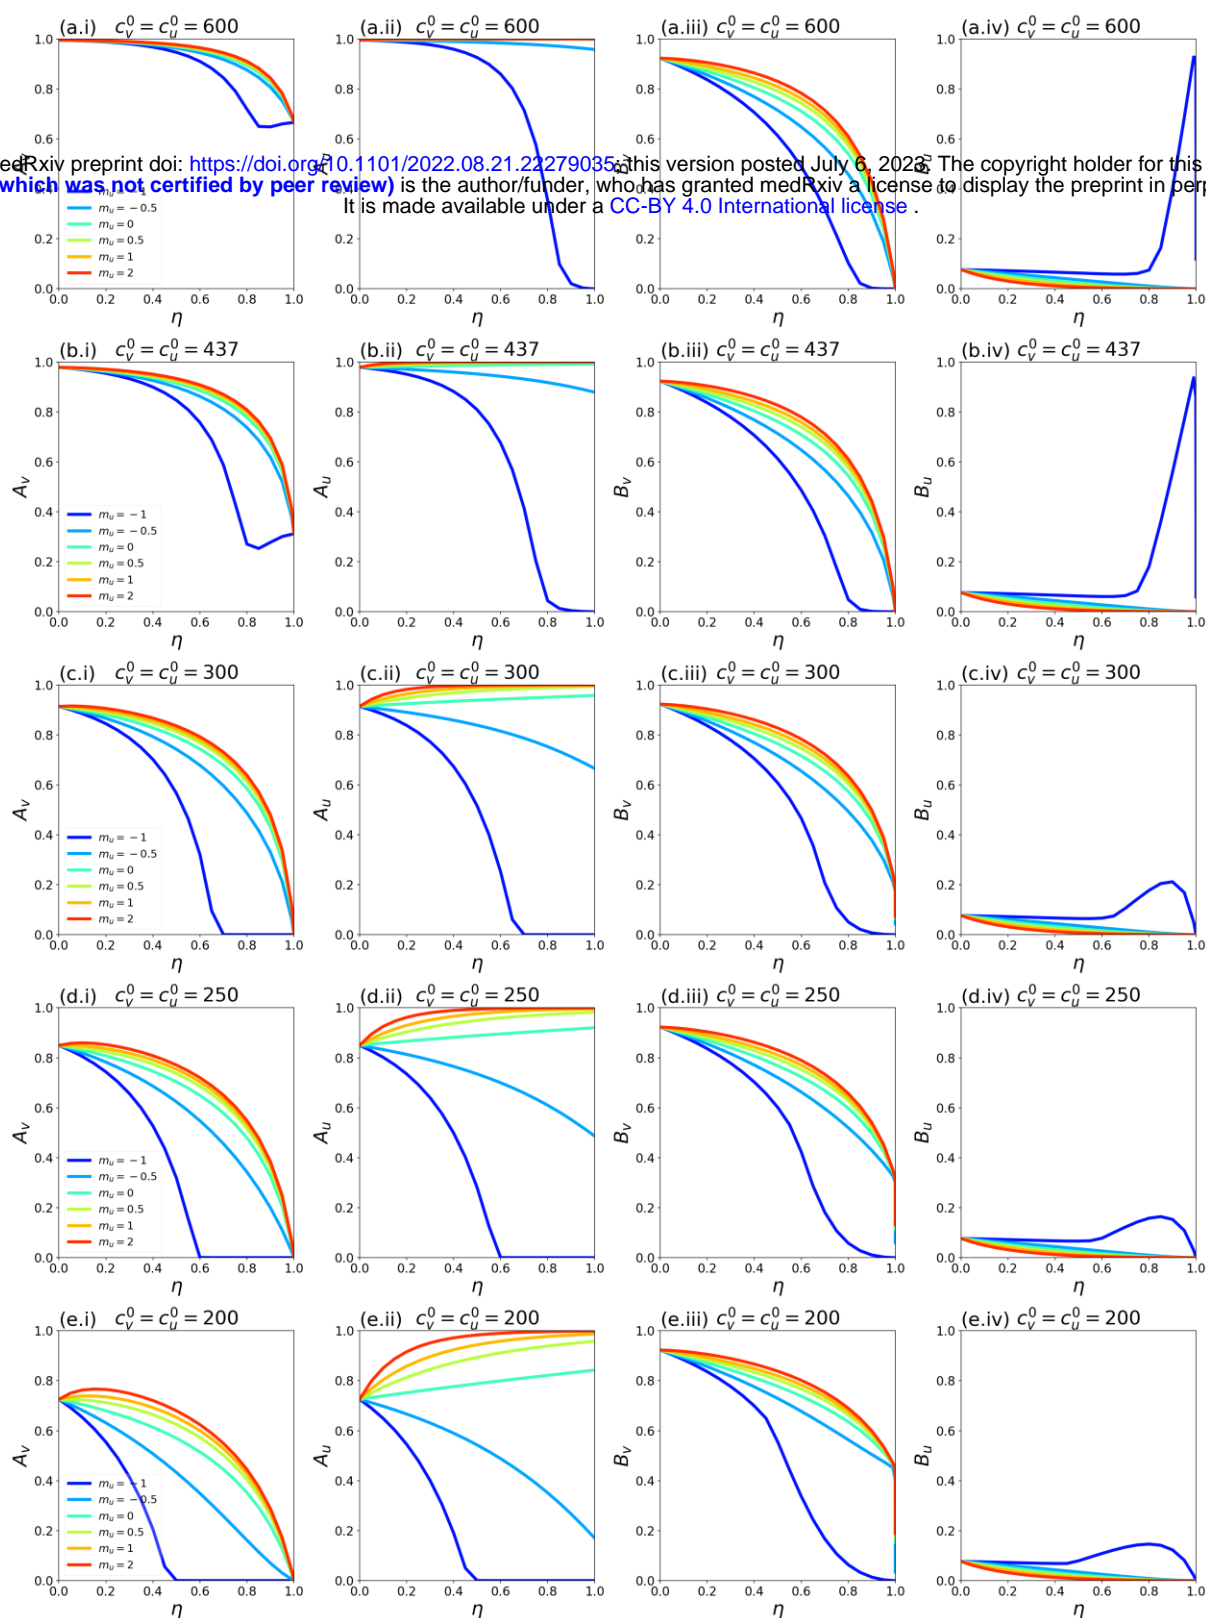

Fig. A2.7: Same as Fig. A2.6, except that  $P_v = 0.25$ .



$P_v=0.5, V_E=0.8, N_I=0.2, m_v=0, \gamma=73$

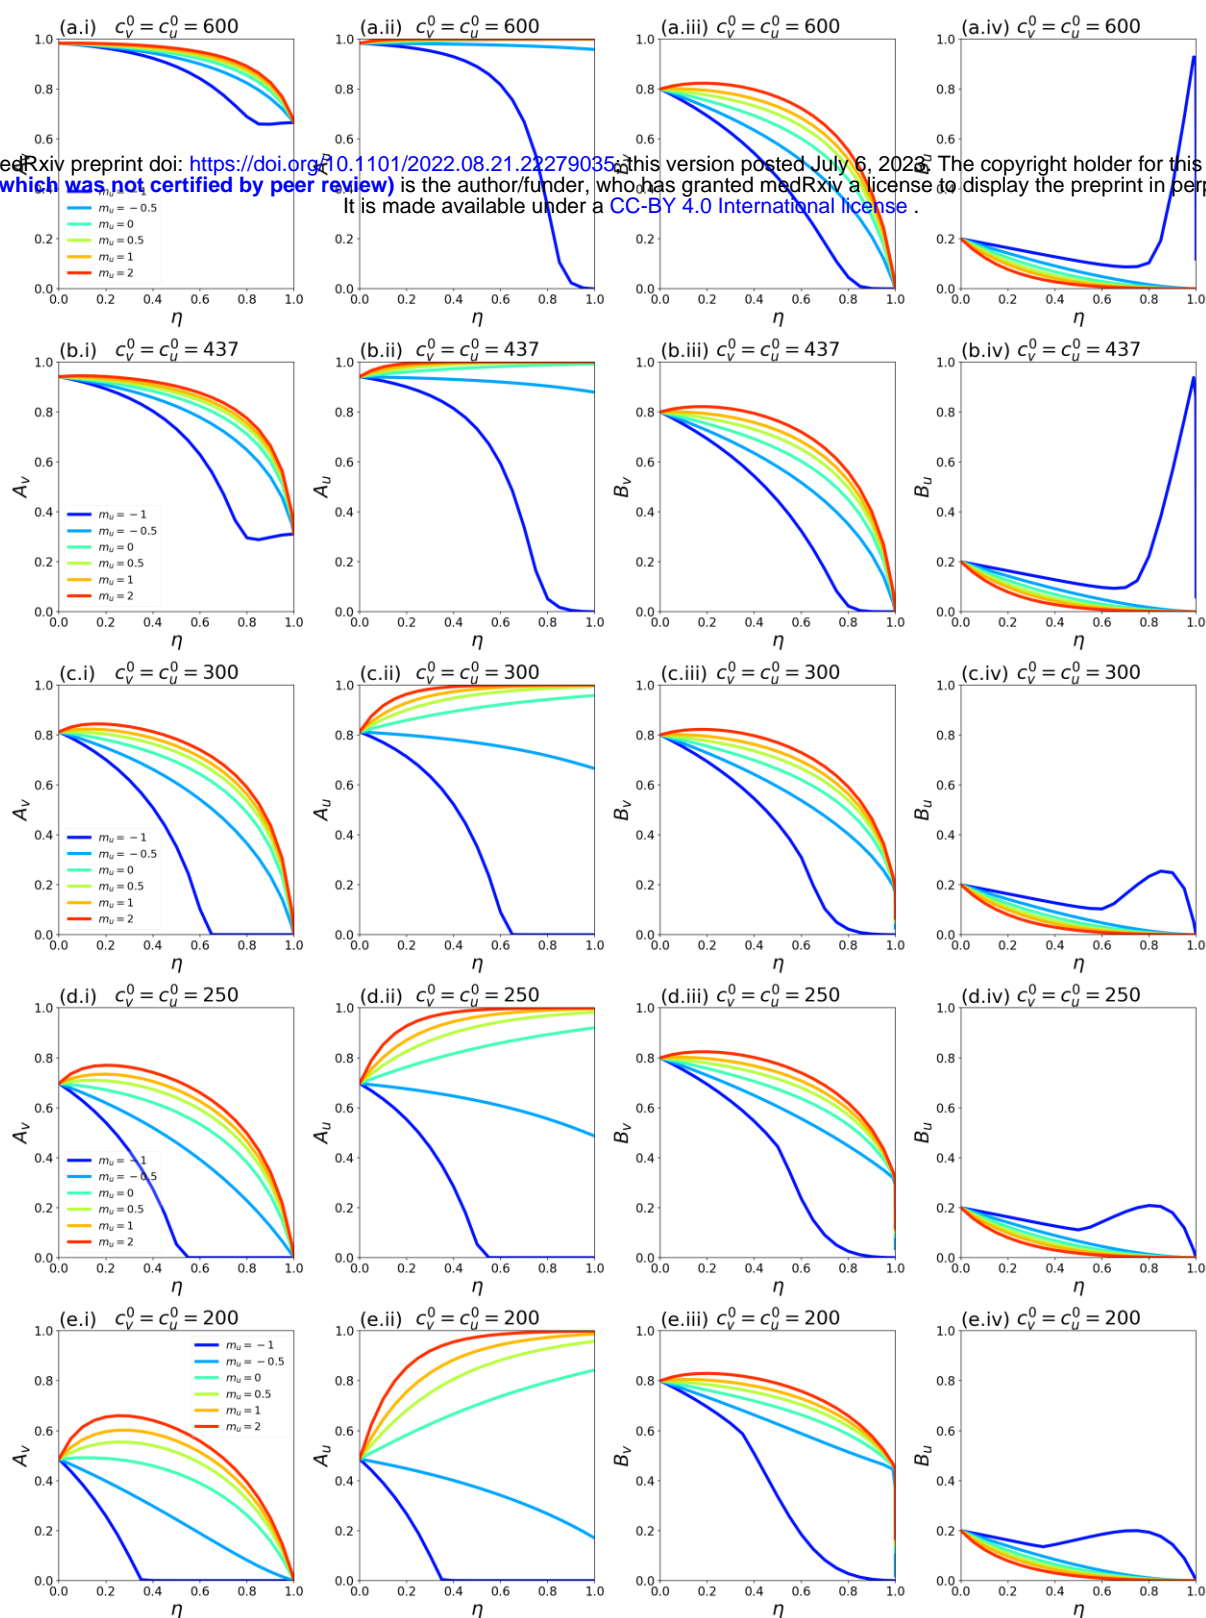

Fig. A2.8: Same as Fig. A2.6, except that  $P_v = 0.5$ .

$P_v=0.6, V_E=0.8, N_I=0.2, m_v=0, \gamma=73$ 
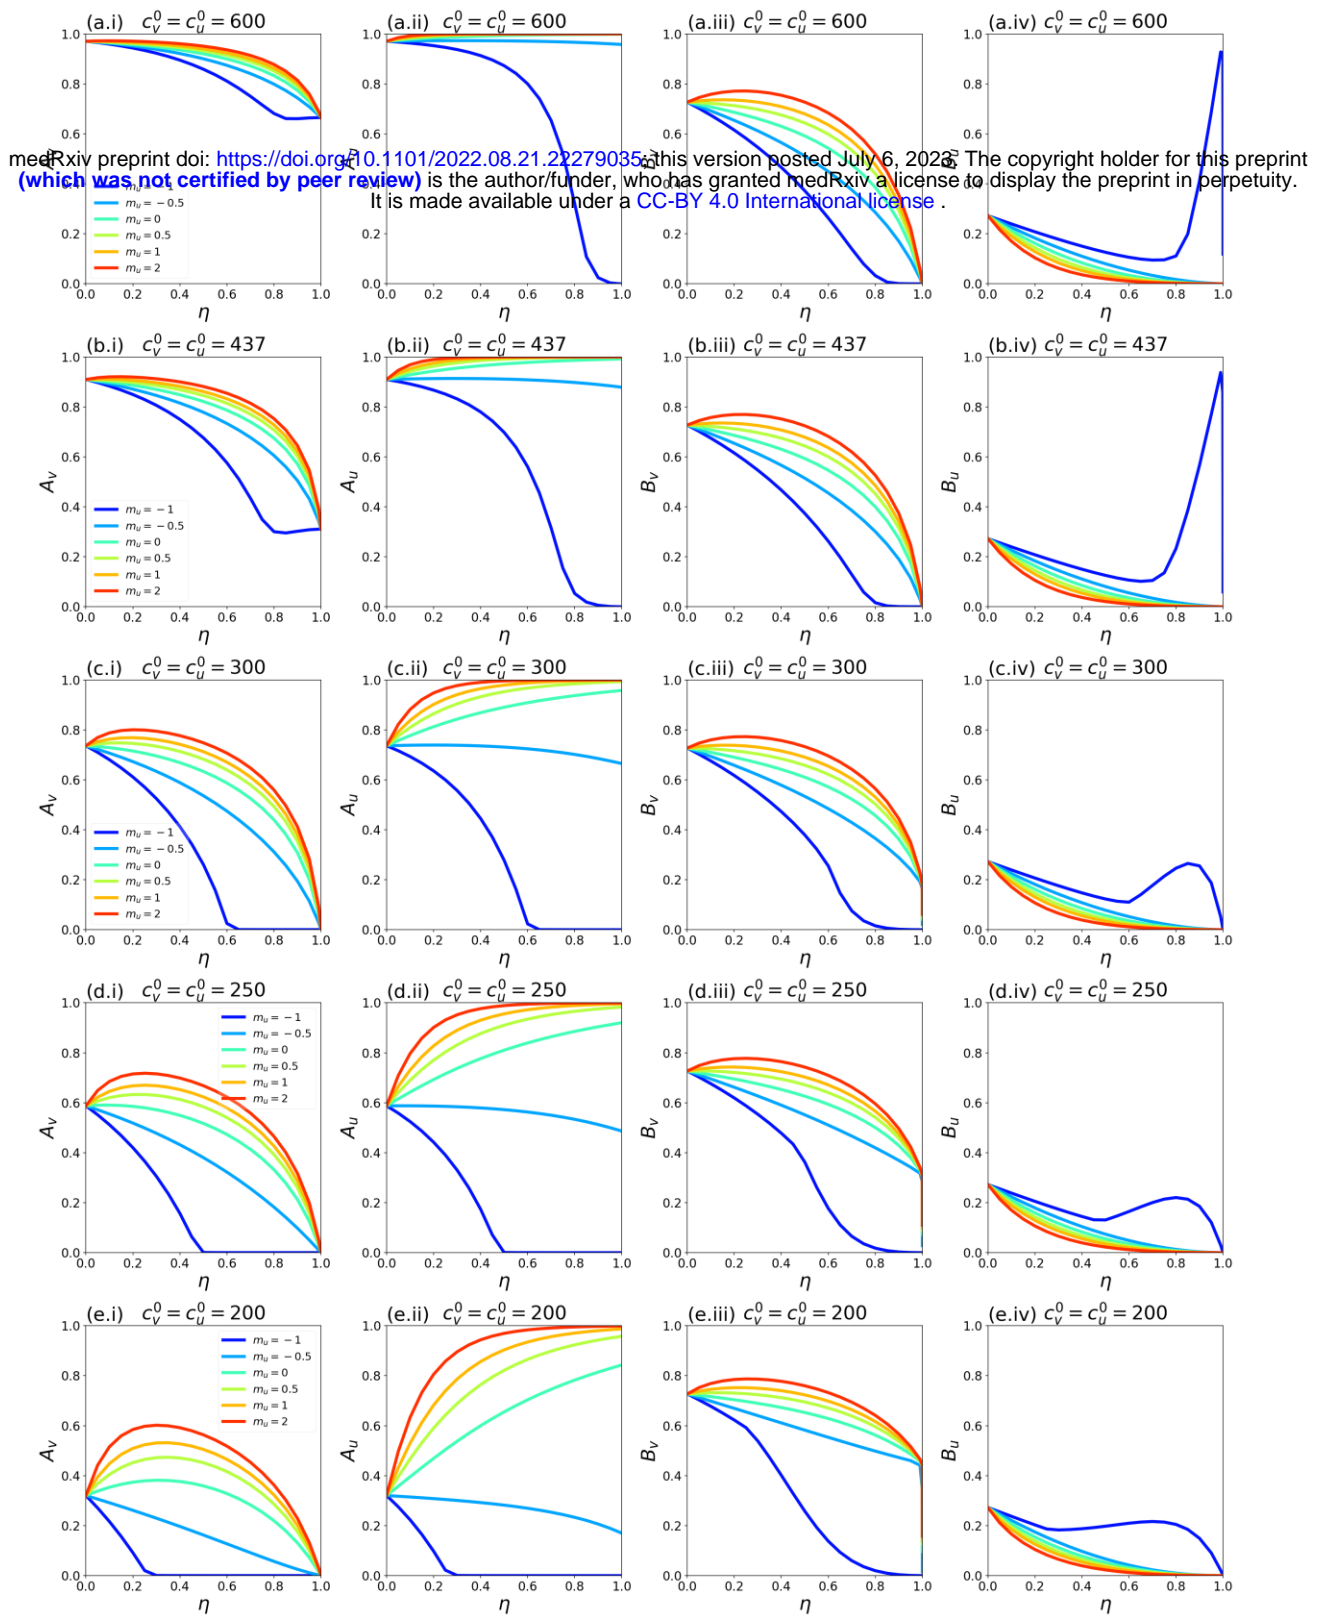

Fig. A2.9: Same as Fig. A2.6, except that  $P_v = 0.6$ .

$P_v=0.7, VE=0.8, NI=0.2, m_v = 0, \gamma = 73$

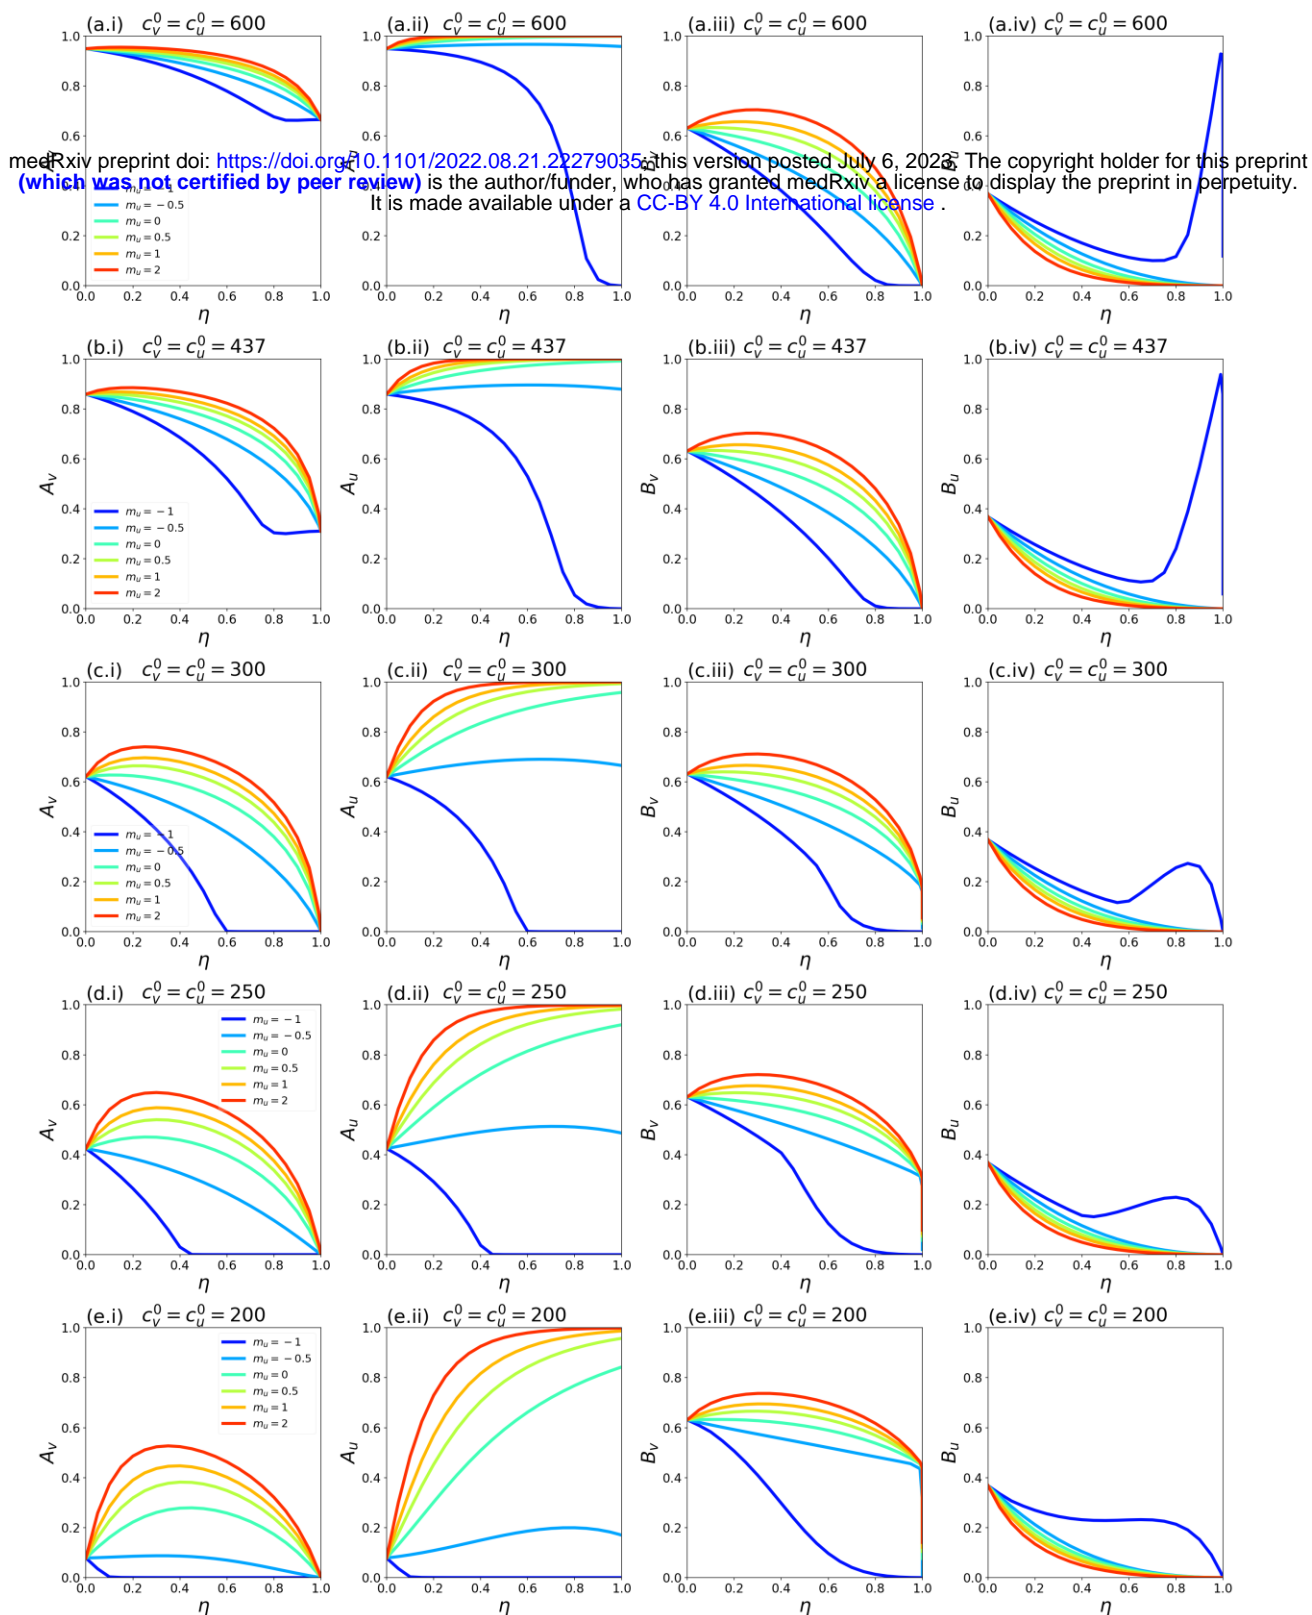

Fig. A2.10: Same as Fig. A2.6, except that  $P_v = 0.7$ .

$P_v=0.8, V_E=0.8, N_I=0.2, m_v=0, \gamma=73$

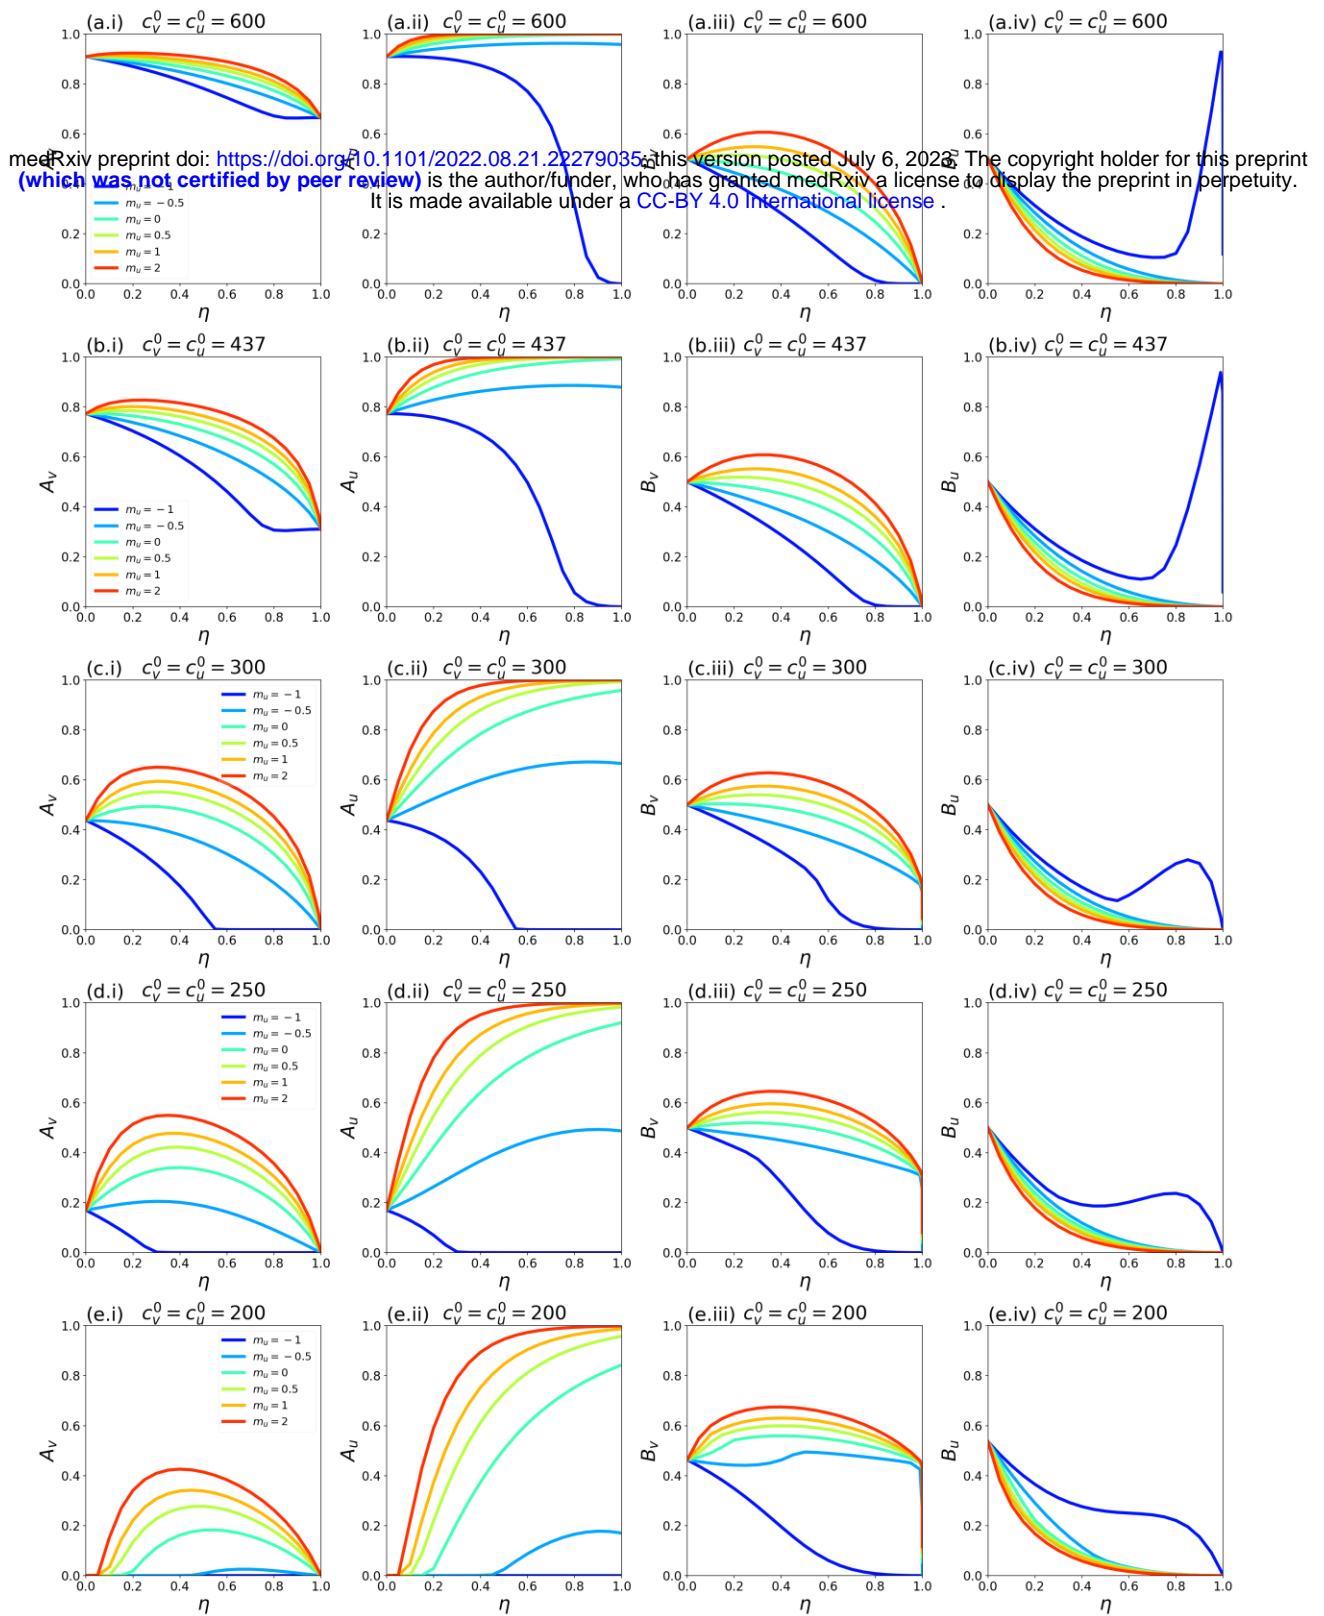

Fig. A2.11: Same as Fig. A2.6, except that  $P_v = 0.8$ . This figure is for the same parameters as Fig. 1 of the main text, such that the  $A_v$ ,  $A_u$ , and  $B_v$  columns in this figure are reproductions of the same columns in Fig. 1 of the main text.

$P_v=0.9, VE=0.8, NI=0.2, m_v=0, \gamma=73$

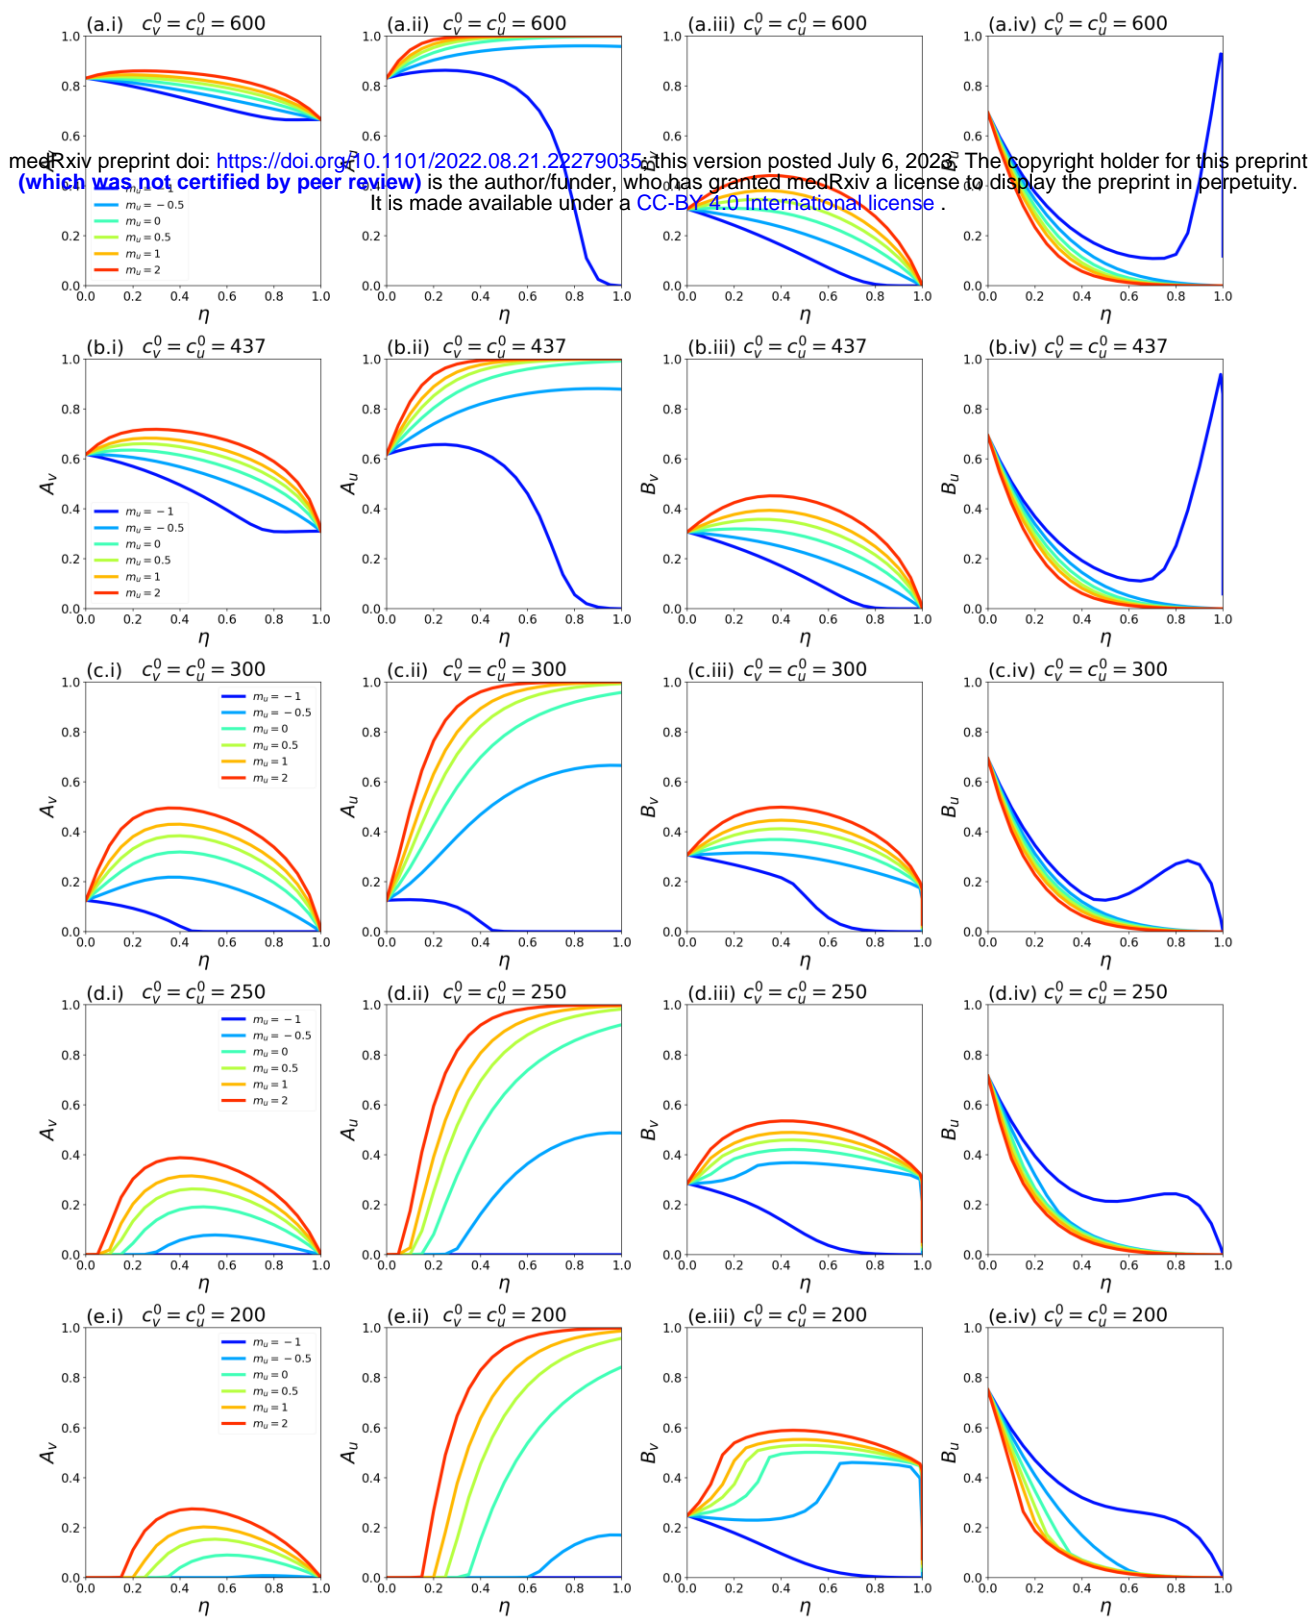

Fig. A2.12: Same as Fig. A2.6, except that  $P_v = 0.9$ .

$P_v=0.95, VE=0.8, NI=0.2, m_v = 0, \gamma = 73$

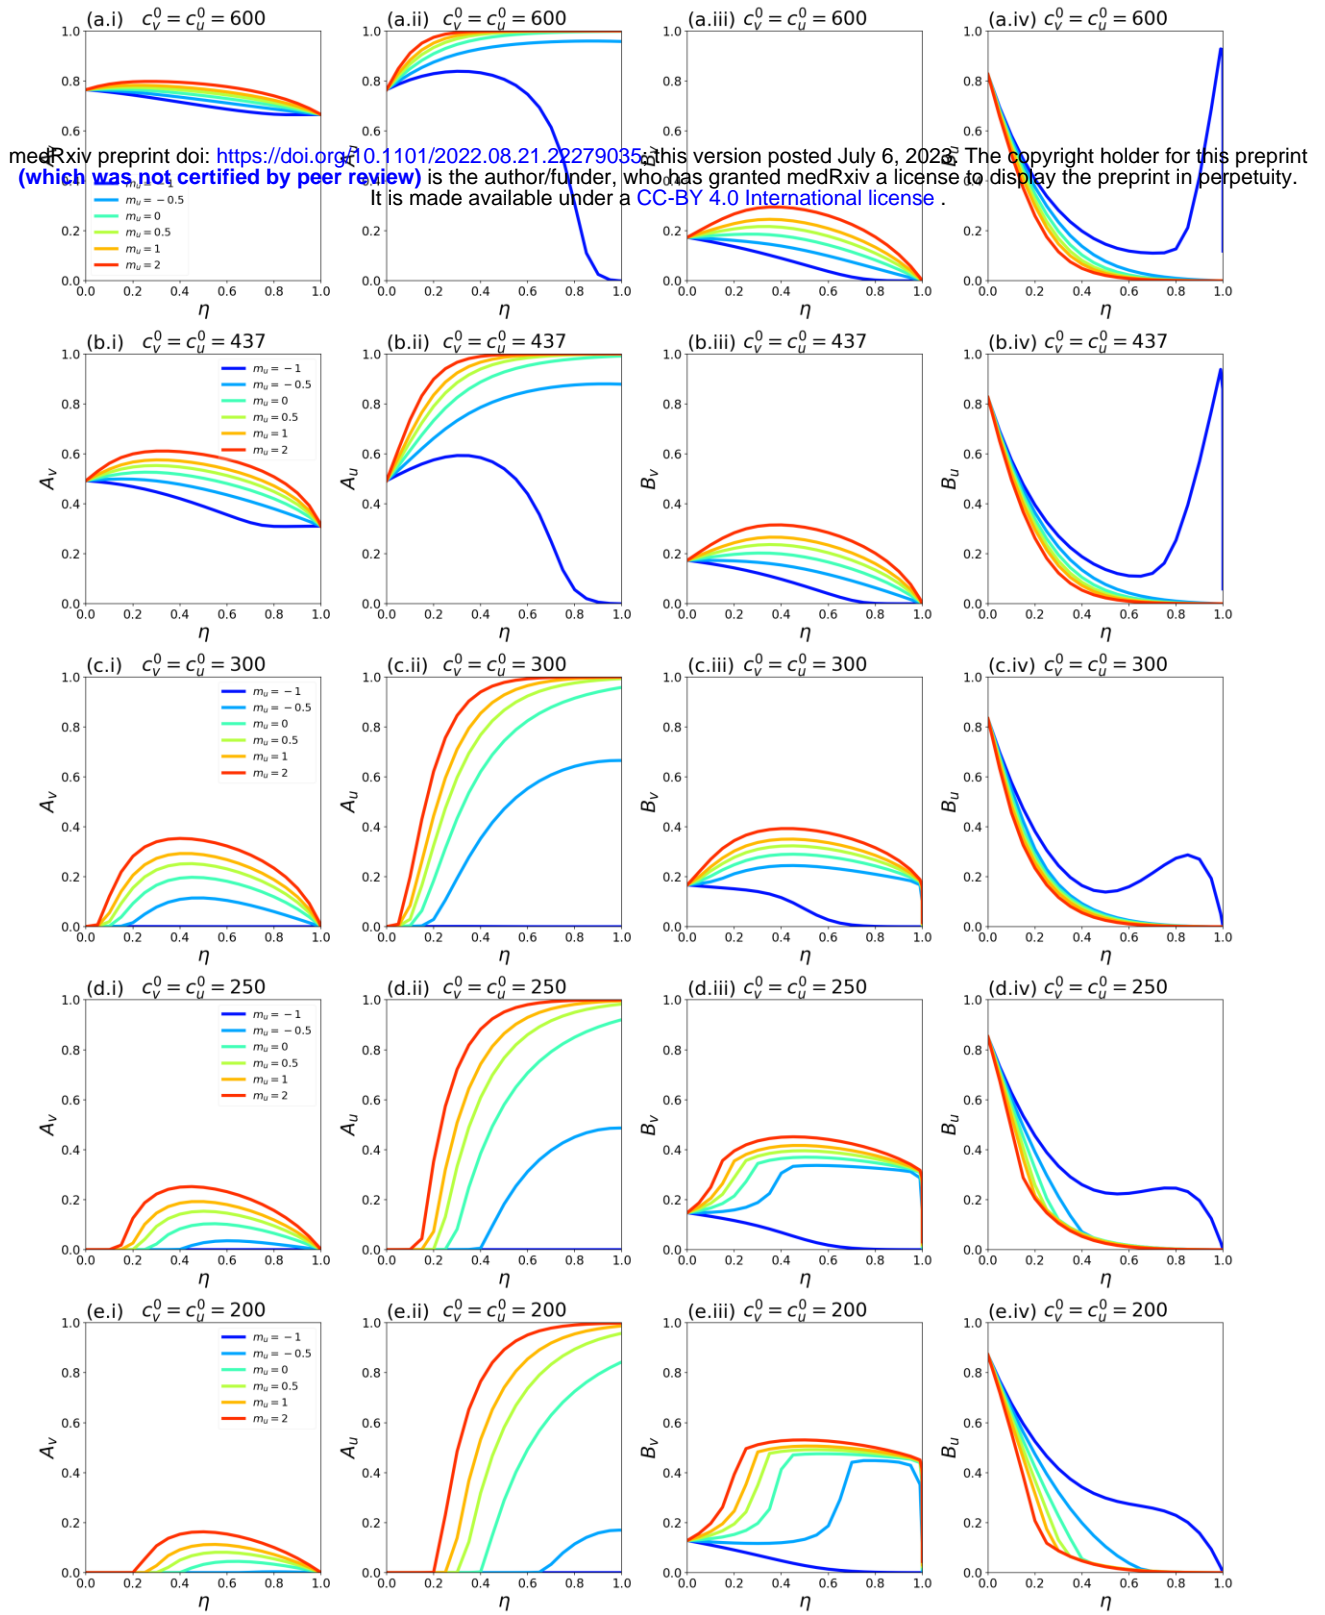

Fig. A2.13: Same as Fig. A2.6, except that  $P_v = 0.95$ .

$P_v=0.99, V_E=0.8, N_I=0.2, m_v = 0, \gamma = 73$

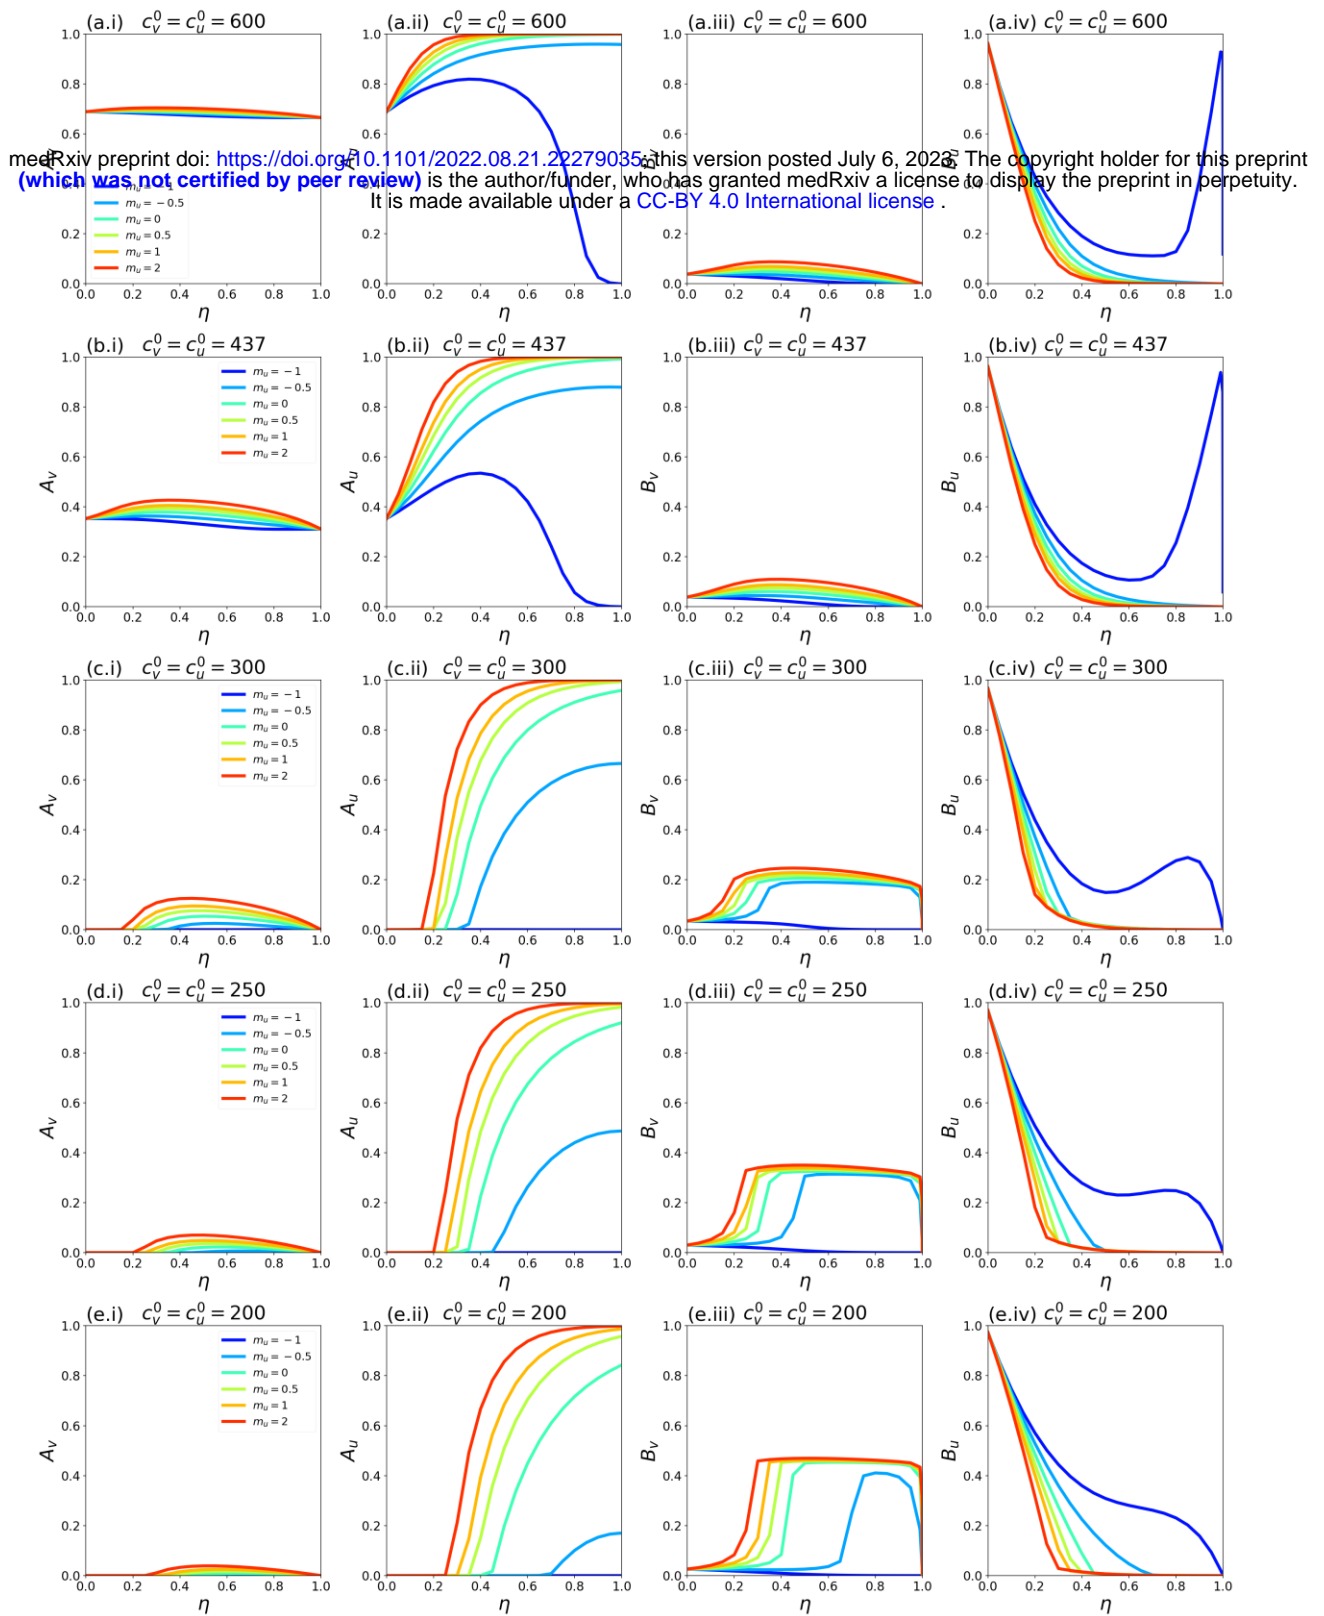

Fig. A2.14: Same as Fig. A2.6, except that  $P_v = 0.99$ .

## A2.2.2: VE = 0.4

 $P_v=0.1, VE=0.4, NI=0.2, m_v=0, \gamma=73$ 
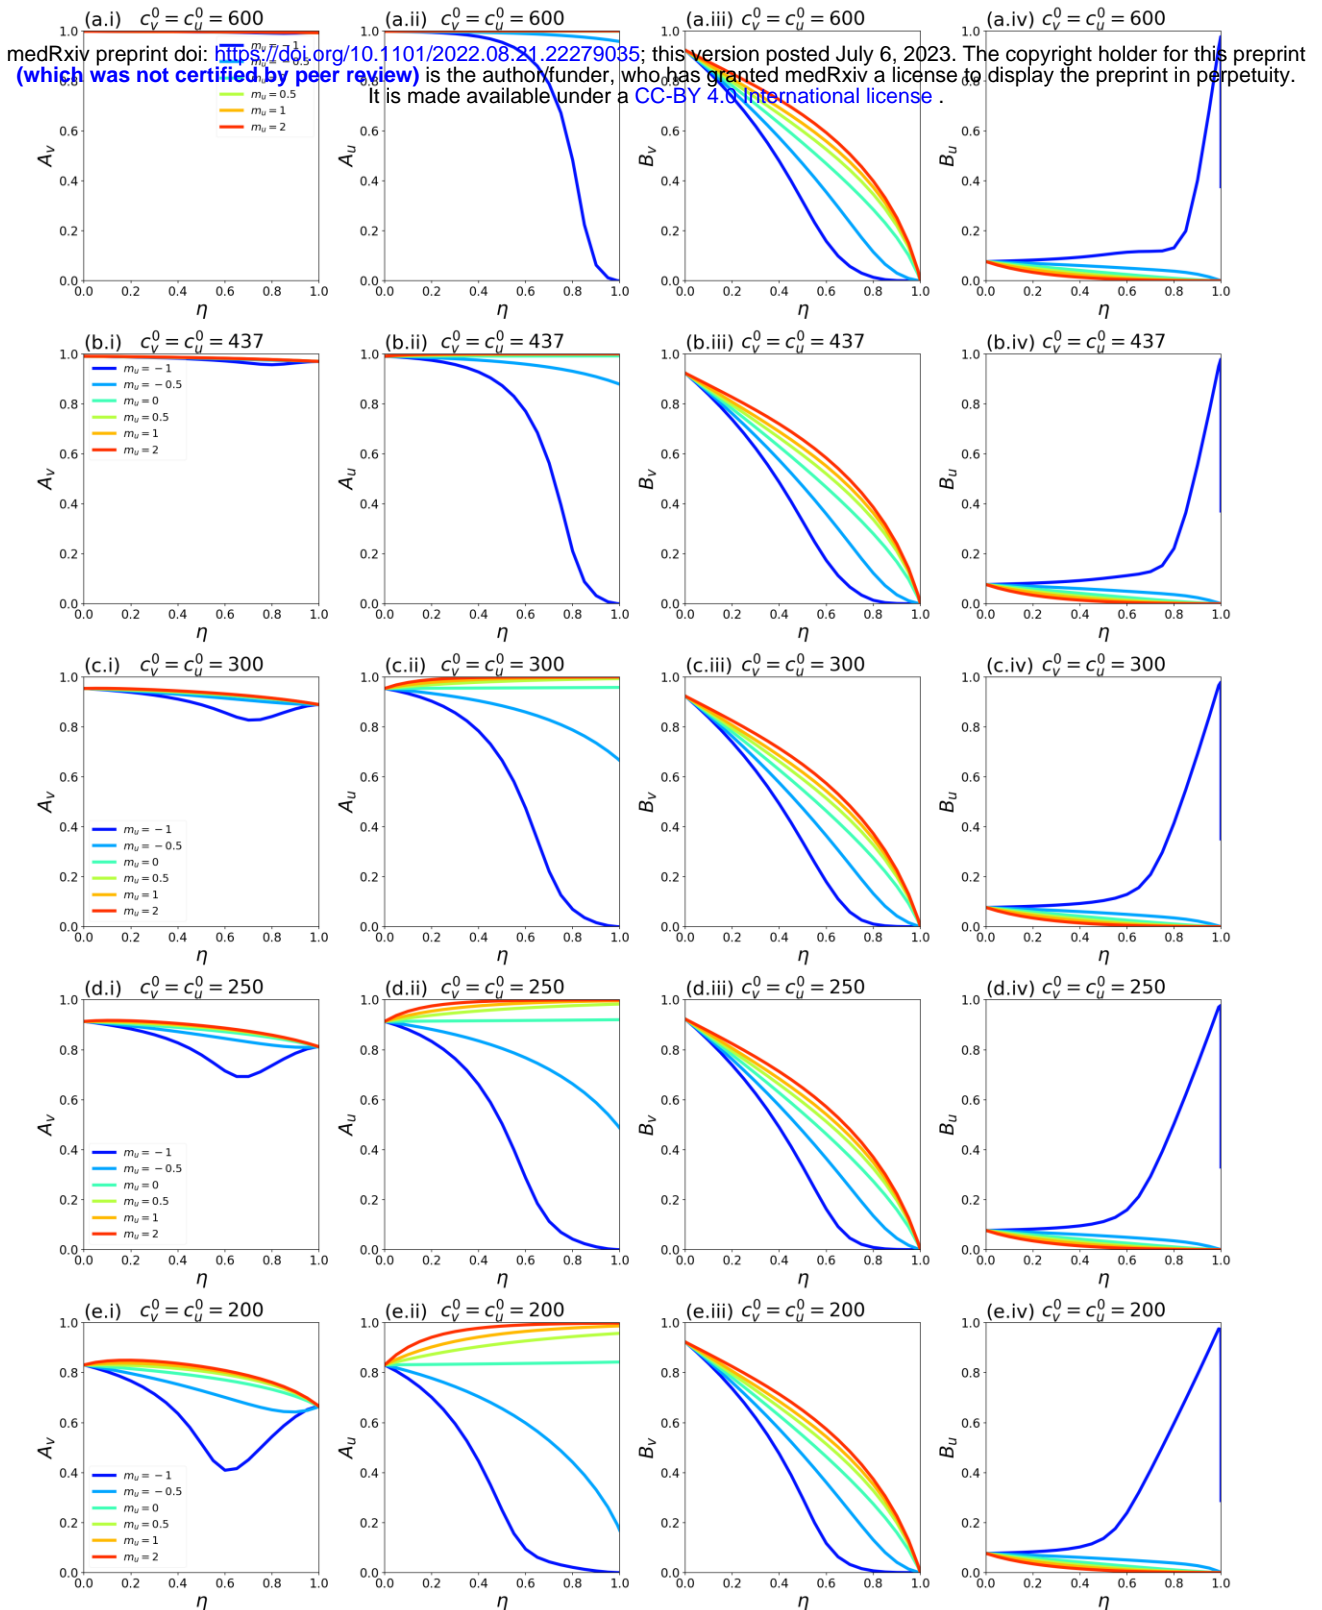

Fig. A2.15:  $A_v$ ,  $A_u$ ,  $B_v$ , and  $B_u$  as functions of  $\eta$ . Each row of panels corresponds to a choice of  $c_v^0 = c_u^0$ , and each coloured line to a choice of  $m_u$  as indicated in the legends. For reference, in a single-population (no vaccination) model, the corresponding  $R_0$  values for rows a-e of the figure are 8.2, 6.0, 4.1, 3.4 and 2.7, respectively. Parameter values  $P_v = 0.1$ ,  $VE = 0.4$ ,  $NI = 0.2$ ,  $m_v = 0$ ,  $\gamma = 73$ .



$P_v=0.25, V_E=0.4, N_I=0.2, m_v=0, \gamma=73$ 
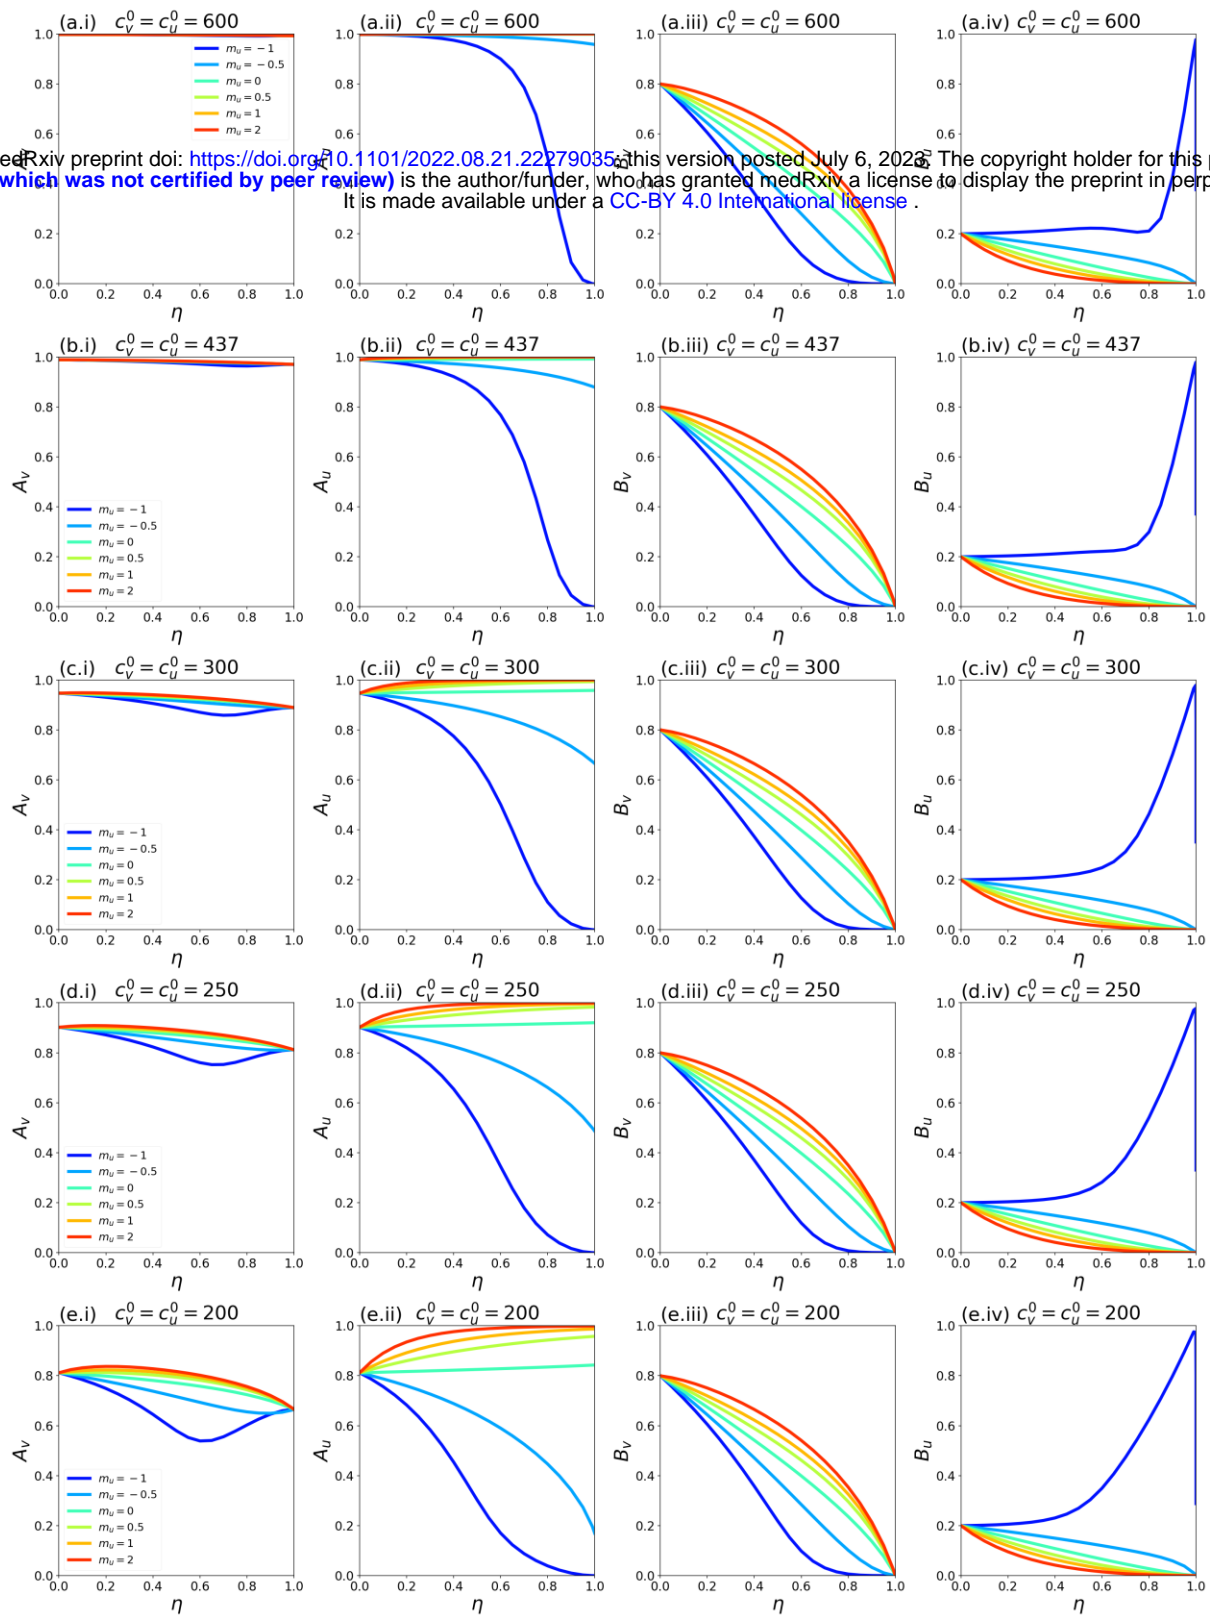

Fig. A2.16: Same as Fig. A2.15, except that  $P_v = 0.25$ .

$P_v=0.5$ ,  $VE=0.4$ ,  $NI=0.2$ ,  $m_v=0$ ,  $\gamma=73$

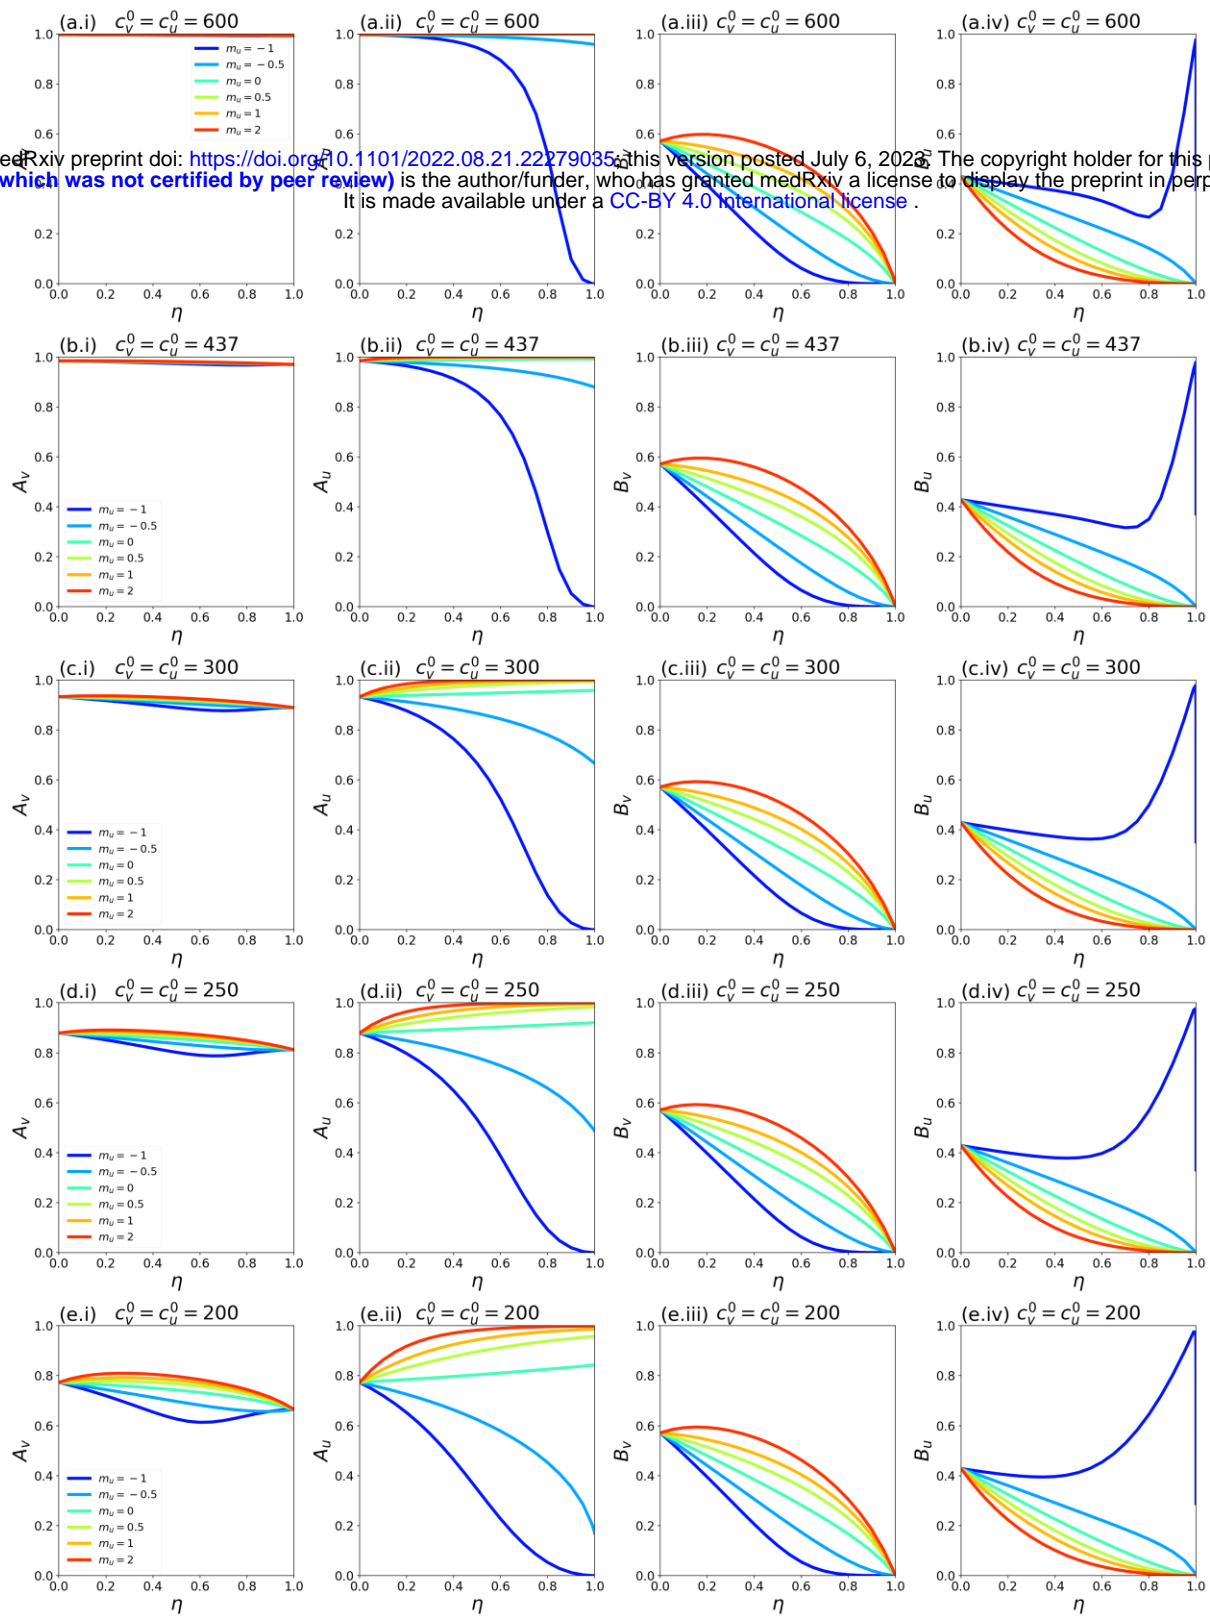

Fig. A2.17: Same as Fig. A2.15, except that  $P_v = 0.5$ .

$P_v=0.6, VE=0.4, NI=0.2, m_v=0, \gamma=73$

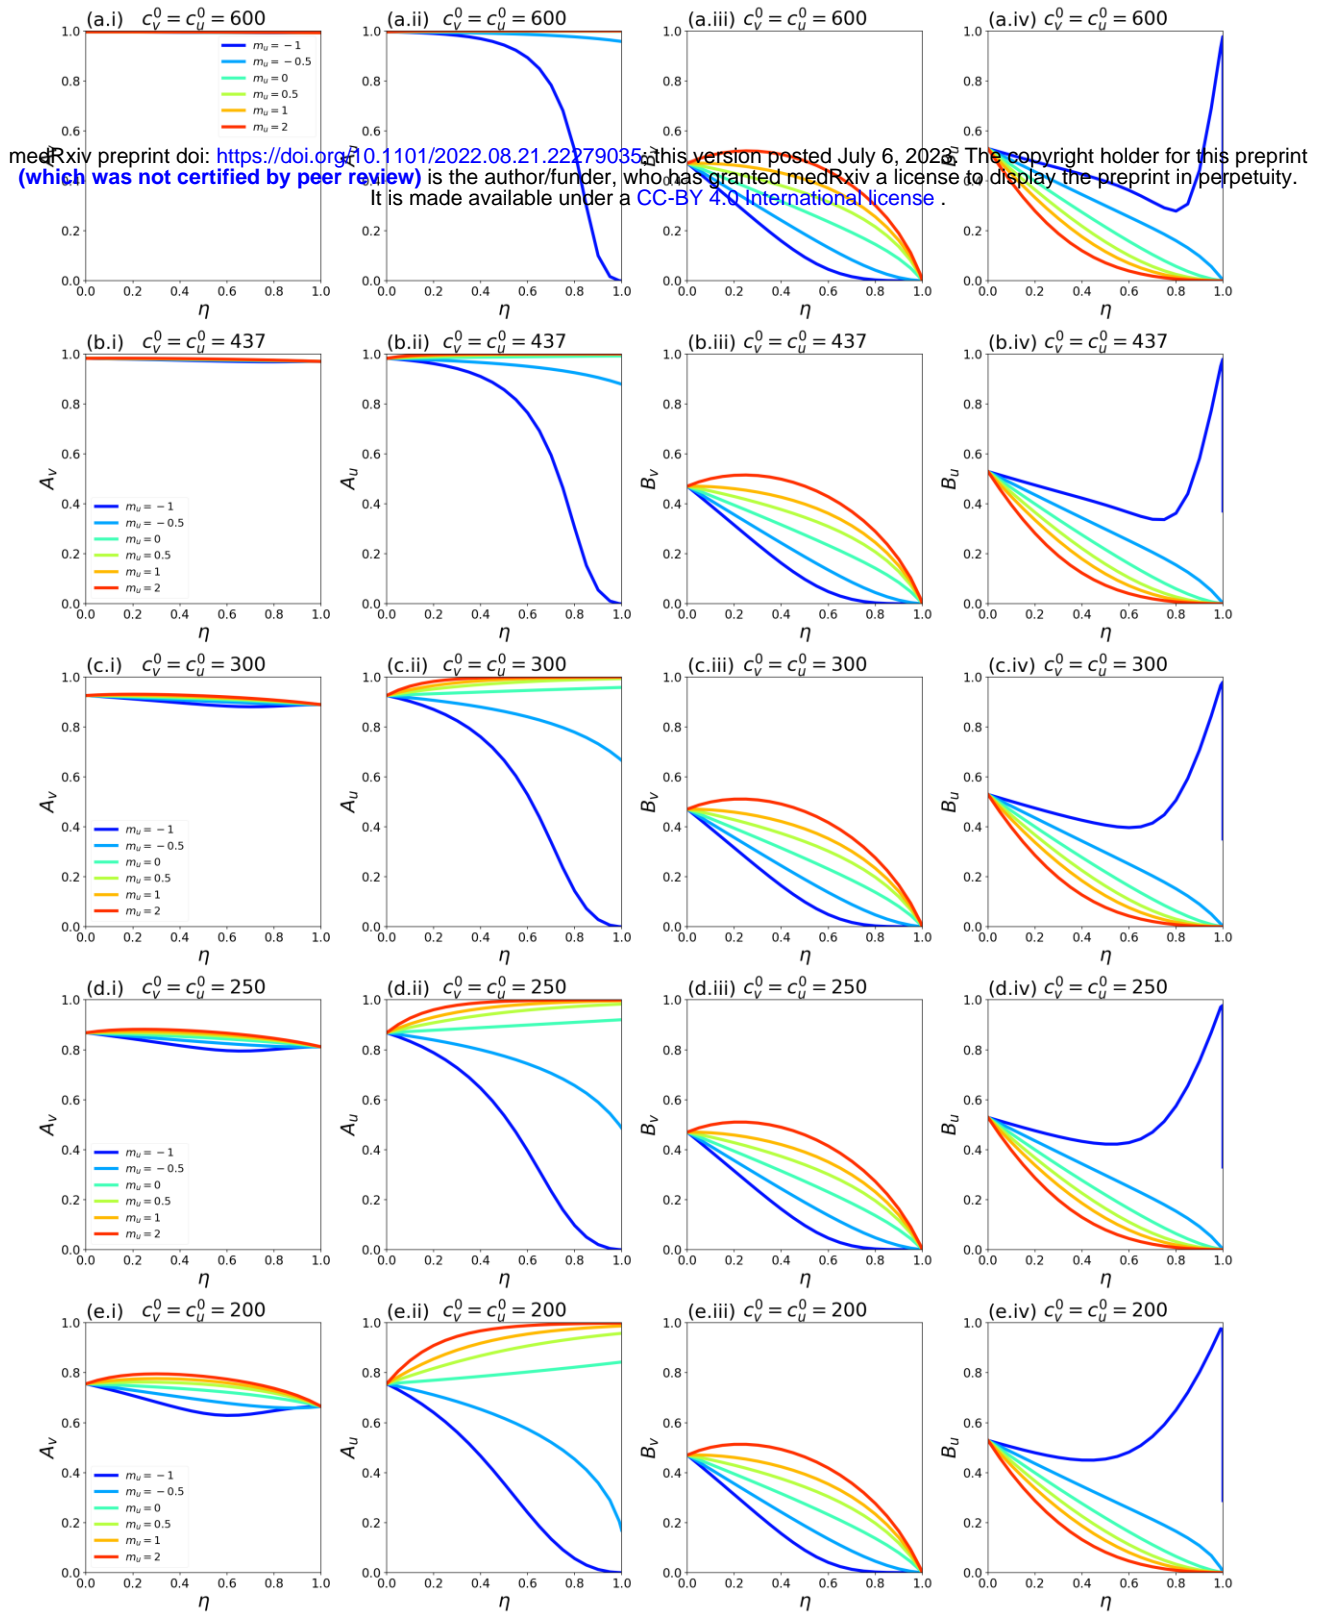

Fig. A2.18: Same as Fig. A2.15, except that  $P_v = 0.6$ .

$P_v=0.7, VE=0.4, NI=0.2, m_v=0, \gamma=73$

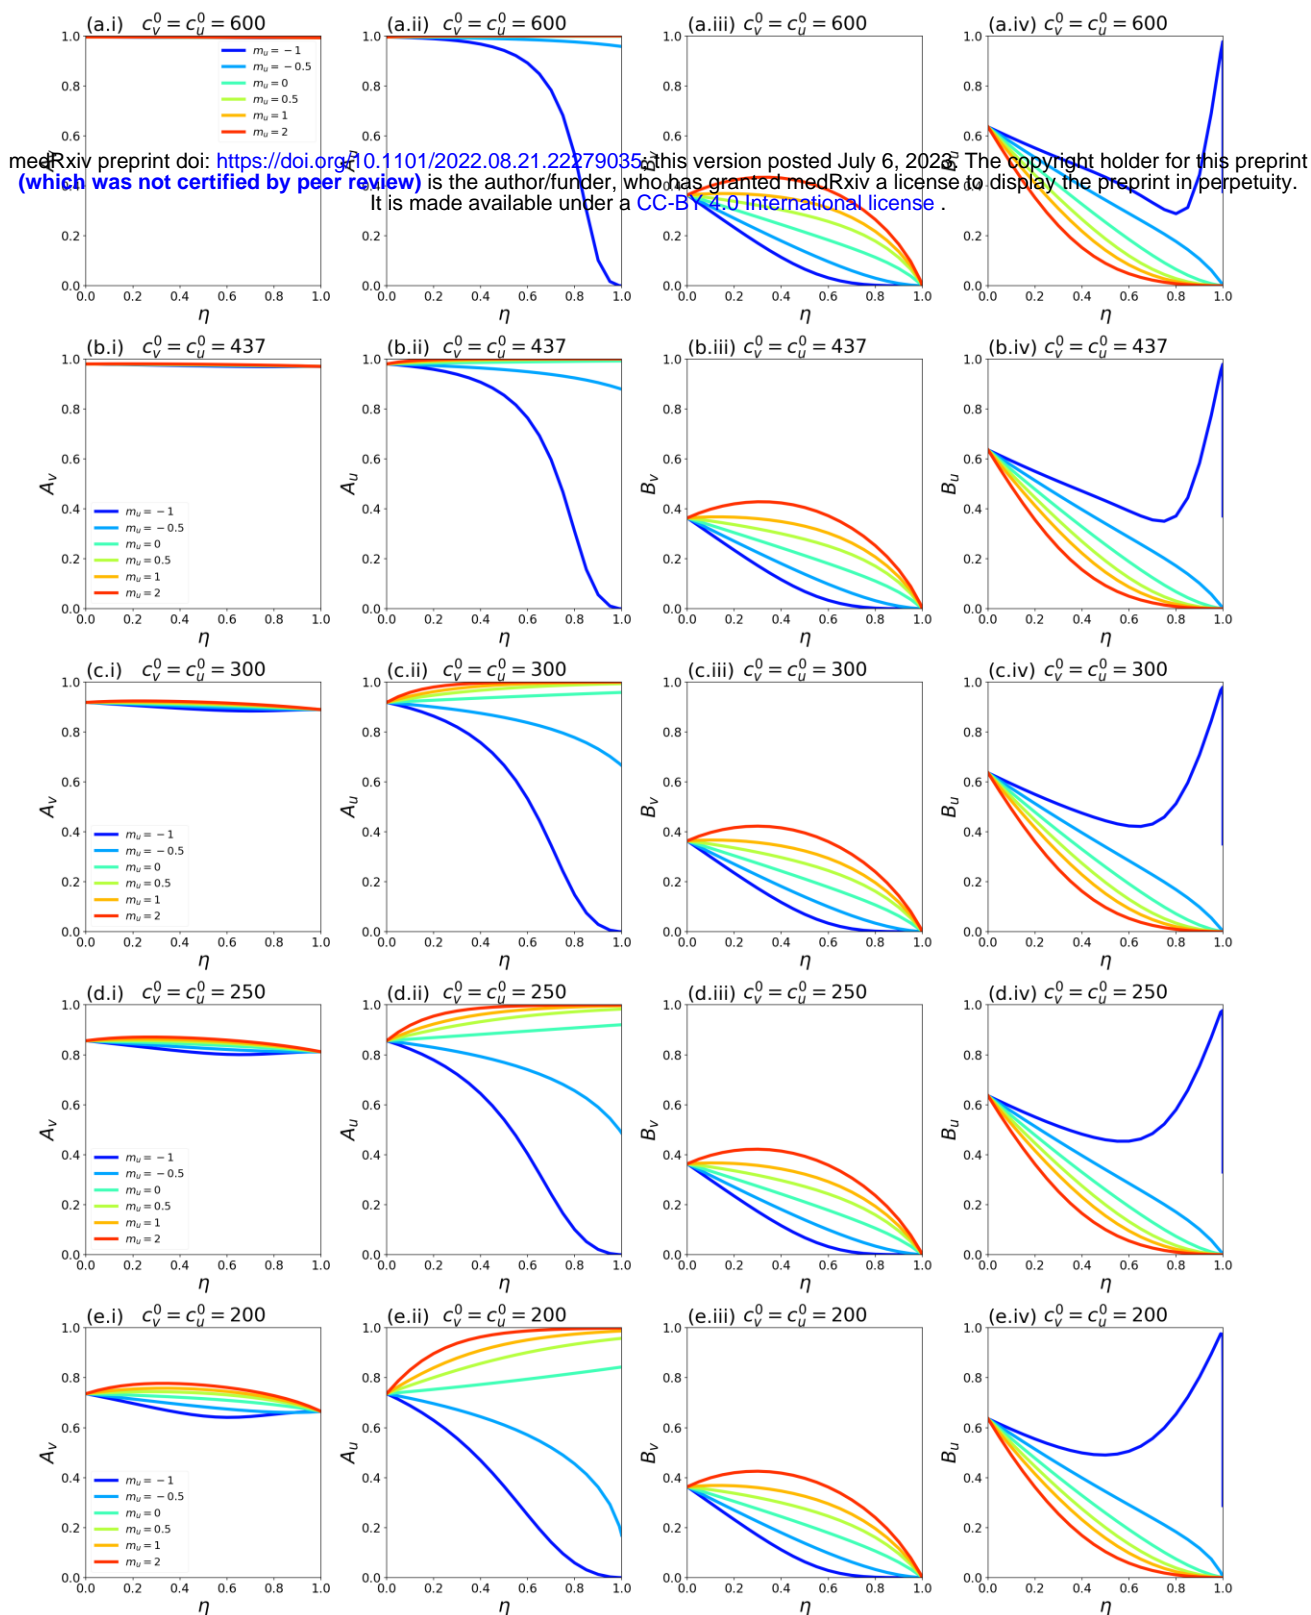

Fig. A2.19: Same as Fig. A2.15, except that  $P_v = 0.7$ .

$P_v=0.8, VE=0.4, NI=0.2, m_v=0, \gamma=73$

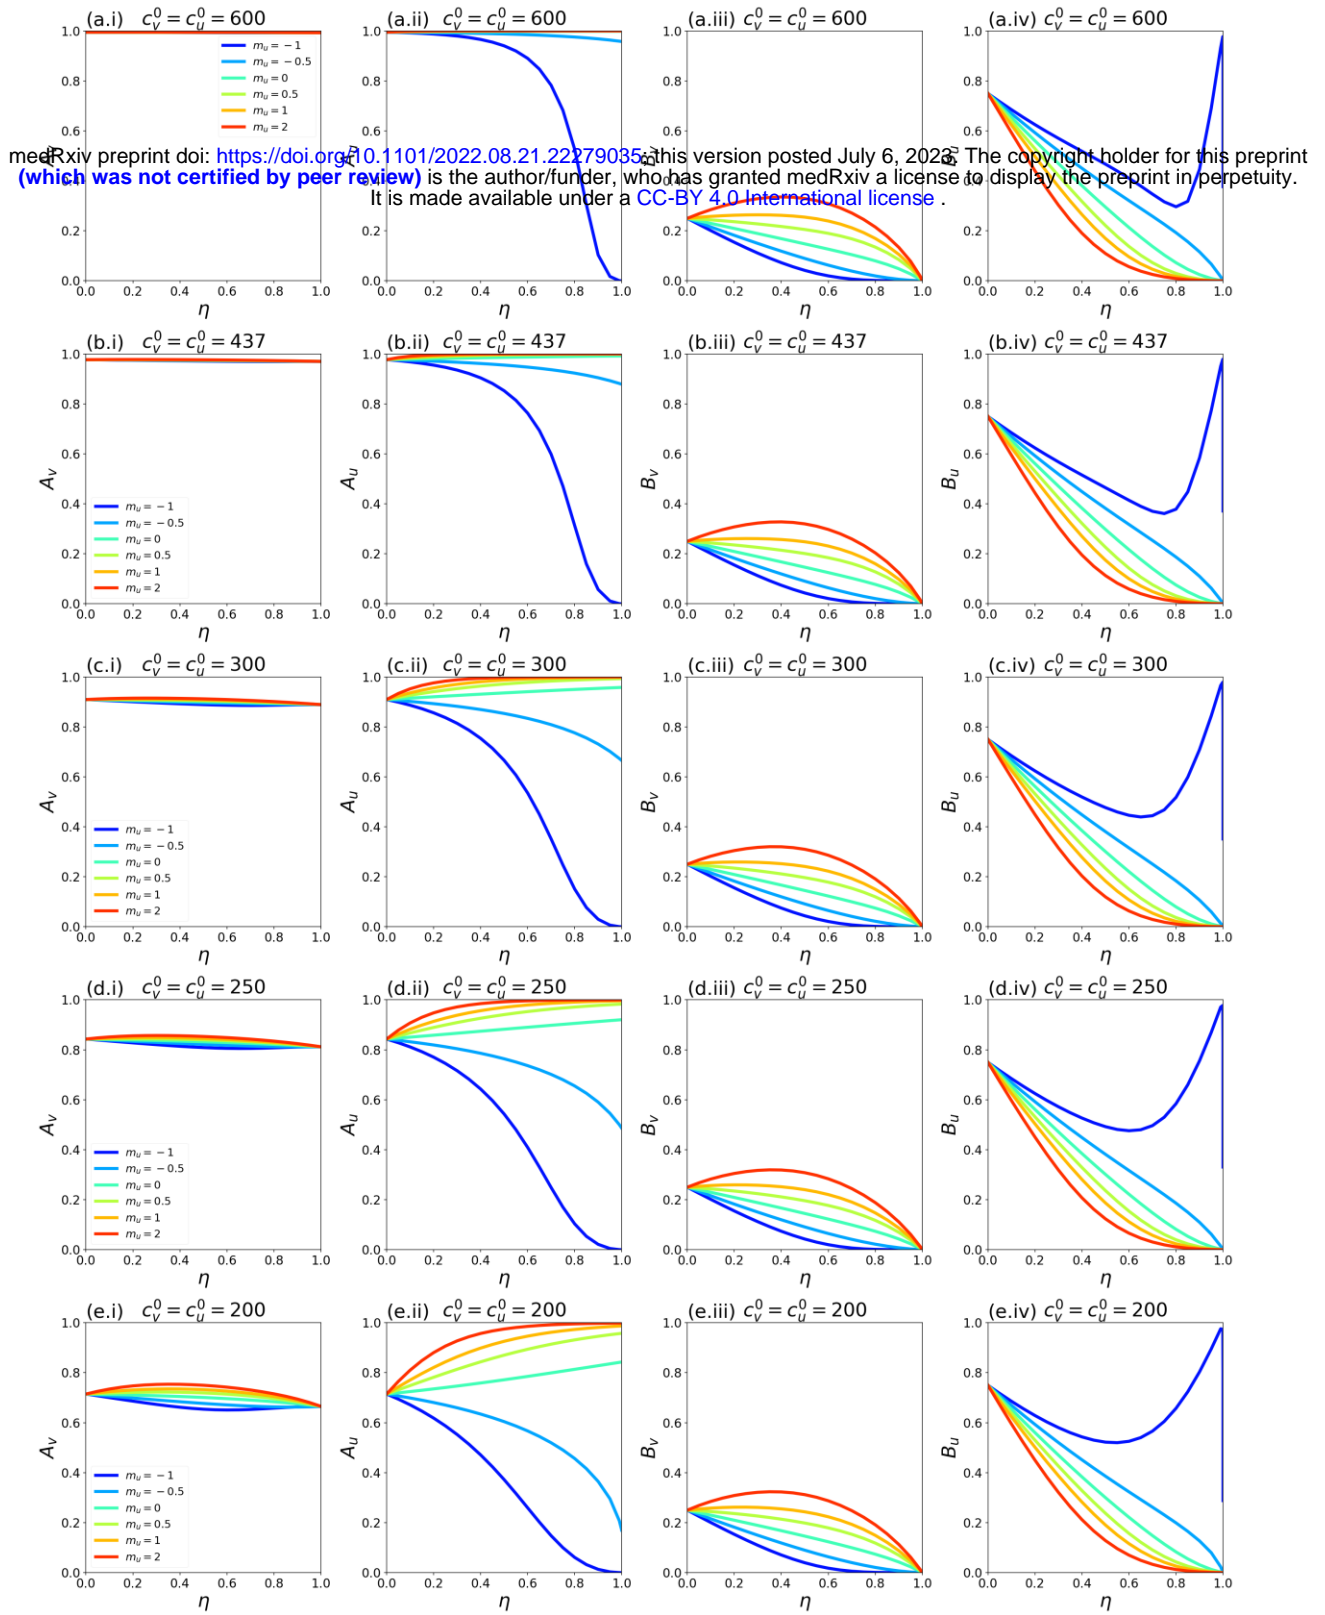

Fig. A2.20: Same as Fig. A2.15, except that  $P_v = 0.8$ .

$P_v=0.9$ ,  $VE=0.4$ ,  $NI=0.2$ ,  $m_v=0$ ,  $\gamma=73$

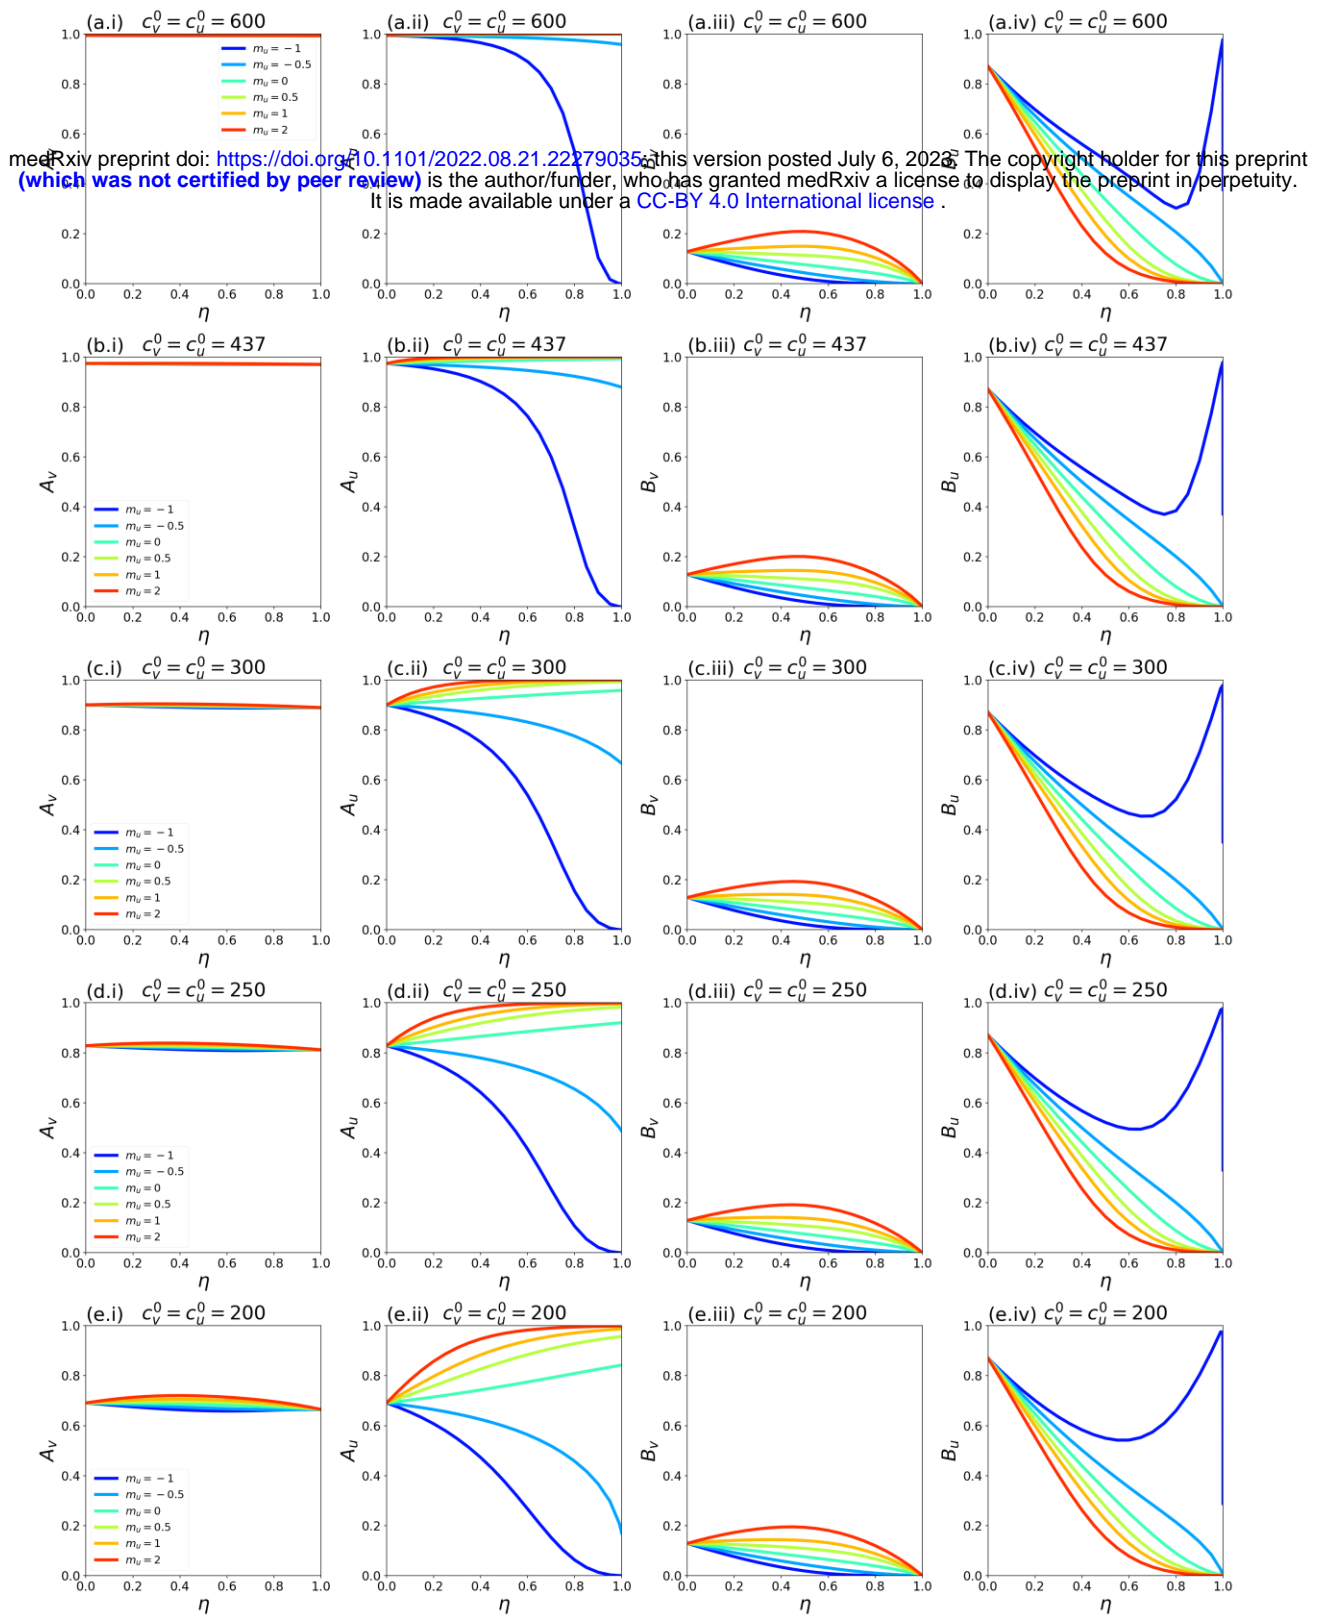

Fig. A2.21: Same as Fig. A2.15, except that  $P_v = 0.9$ .

$P_v=0.95, V_E=0.4, N_I=0.2, m_v = 0, \gamma = 73$

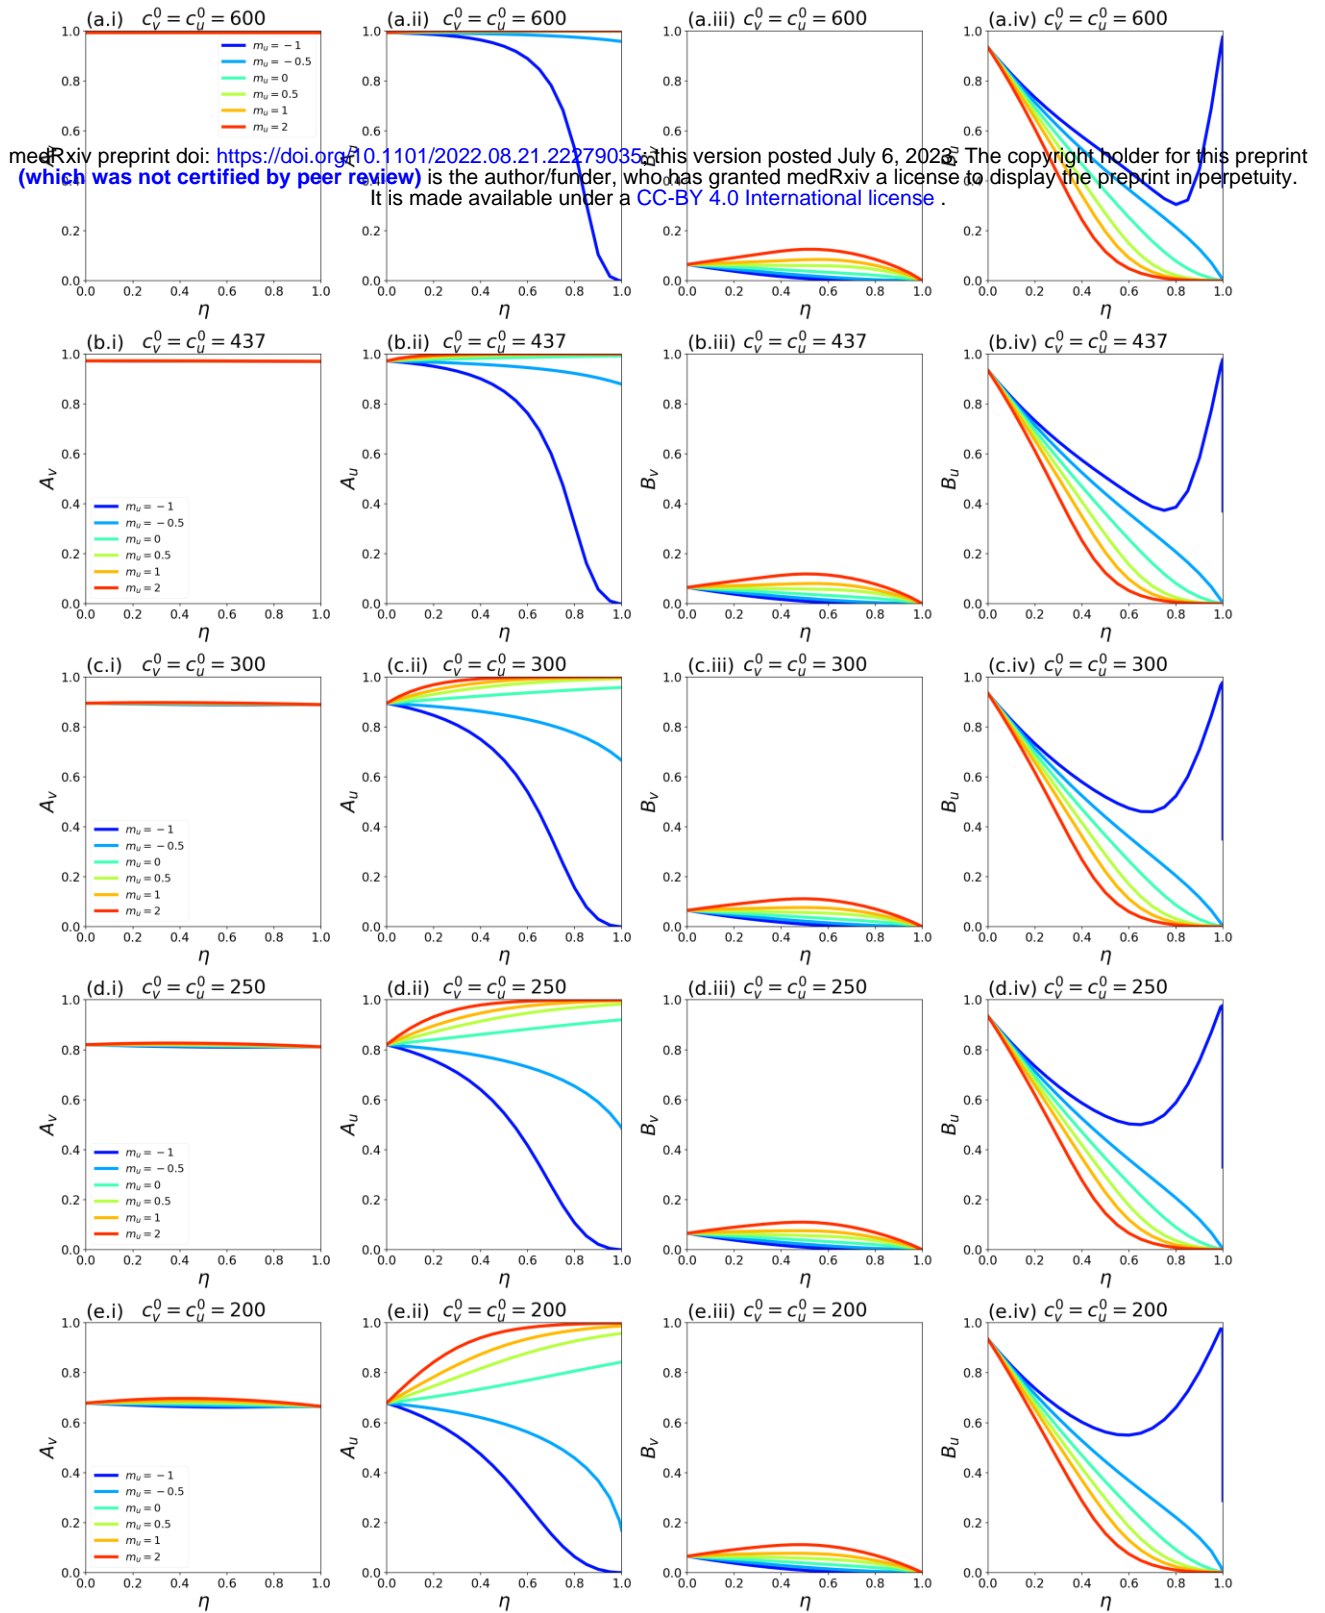

Fig. A2.22: Same as Fig. A2.15, except that  $P_v = 0.95$ .

$P_v = 0.99, V_E = 0.4, N_I = 0.2, m_v = 0, \gamma = 73$ 
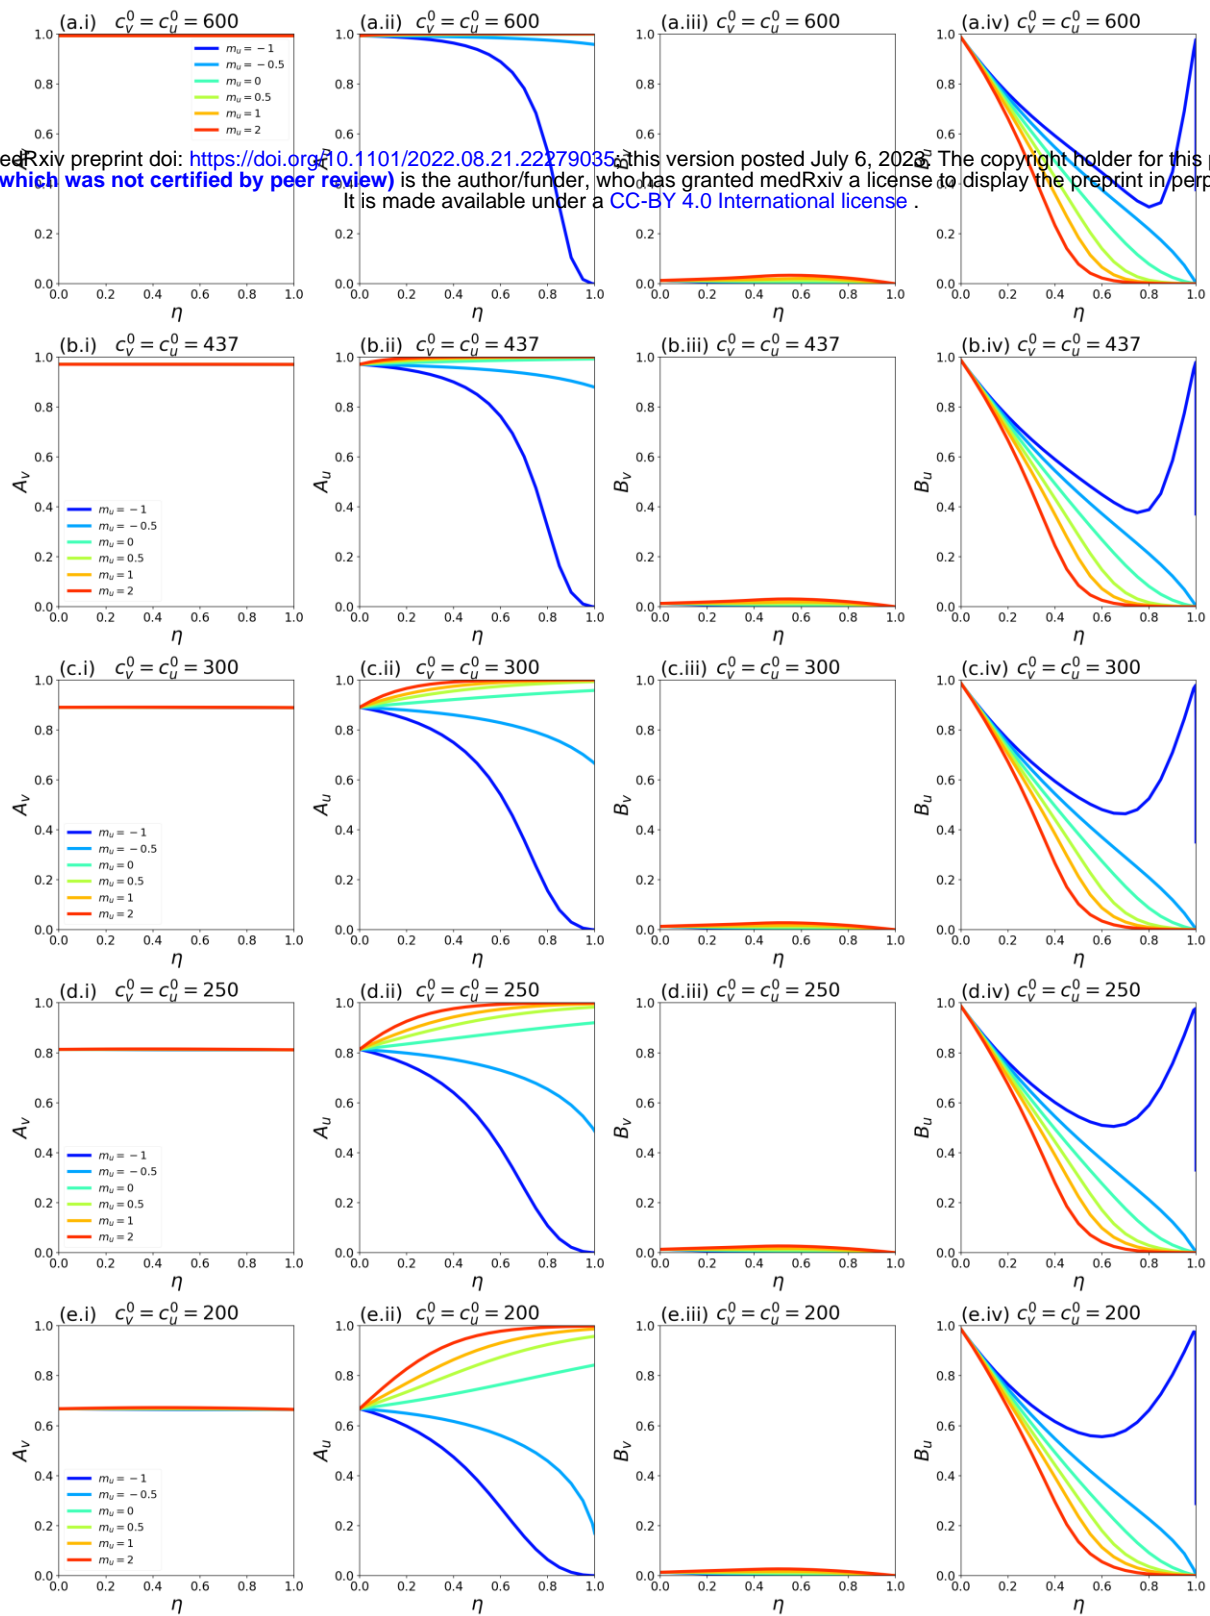

Fig. A2.23: Same as Fig. A2.15, except that  $P_v = 0.99$ .



### A2.3: Epidemic outcomes for different values of $m_v$

$P_v=0.8, VE=0.8, NI=0.2, m_v=0, \gamma=73$

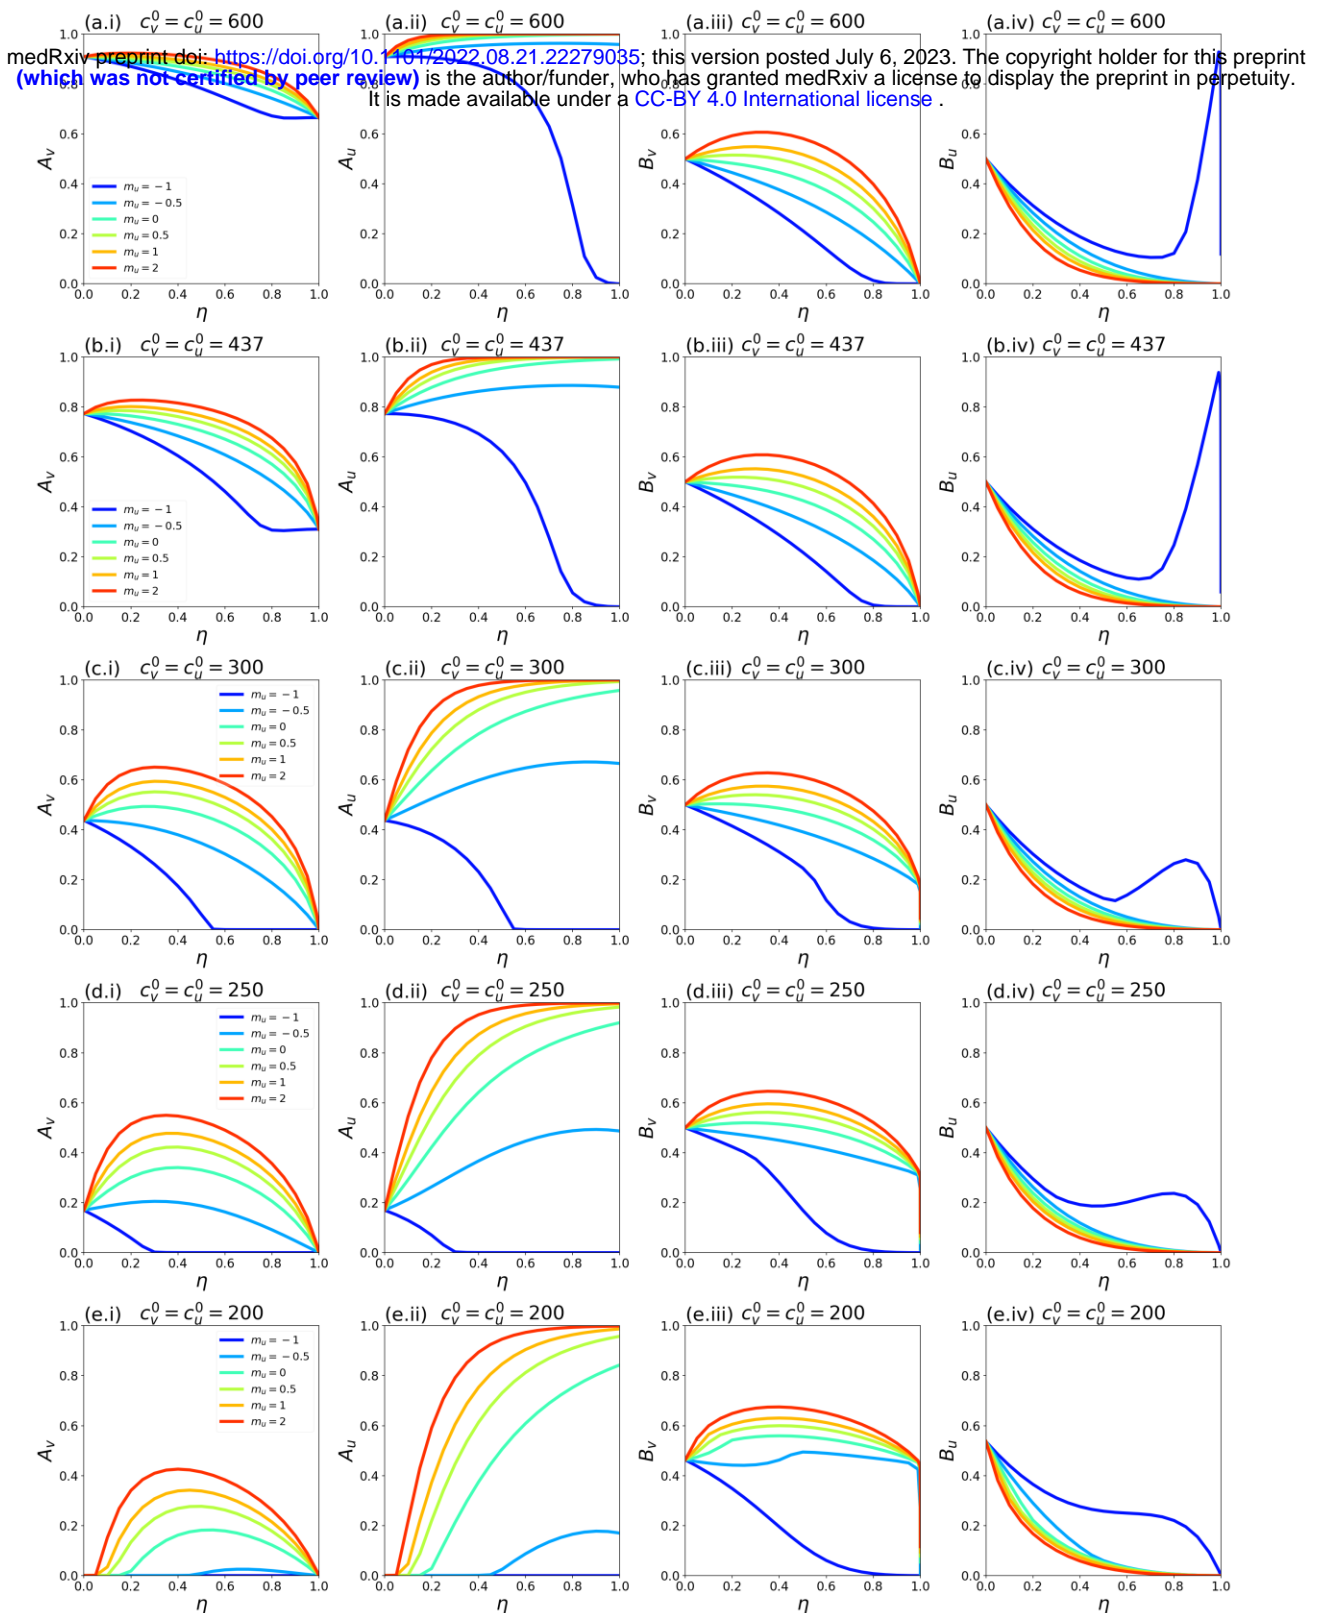

Fig. A2.24:  $A_v$ ,  $A_u$ ,  $B_v$ , and  $B_u$  as functions of  $\eta$ . Each row of panels corresponds to a choice of  $c_v^0 = c_u^0$ , and each coloured line to a choice of  $m_u$  as indicated in the legends. For reference, in a single-population (no vaccination) model, the corresponding  $R_0$  values for rows a-e of the figure are 8.2, 6.0, 4.1, 3.4 and 2.7, respectively. Parameter values  $P_v = 0.8$ ,  $VE = 0.8$ ,  $NI = 0.2$ ,  $m_v = 0$ ,  $\gamma = 73$ . This figure is for the same parameters as Fig. 1 of the main text, such that the  $A_v$ ,  $A_u$ , and  $B_v$  columns in this figure are reproductions of the same columns in Fig. 1 of the main text.

$P_v=0.8, V_E=0.8, N_I=0.2, m_v = 1, \gamma = 73$

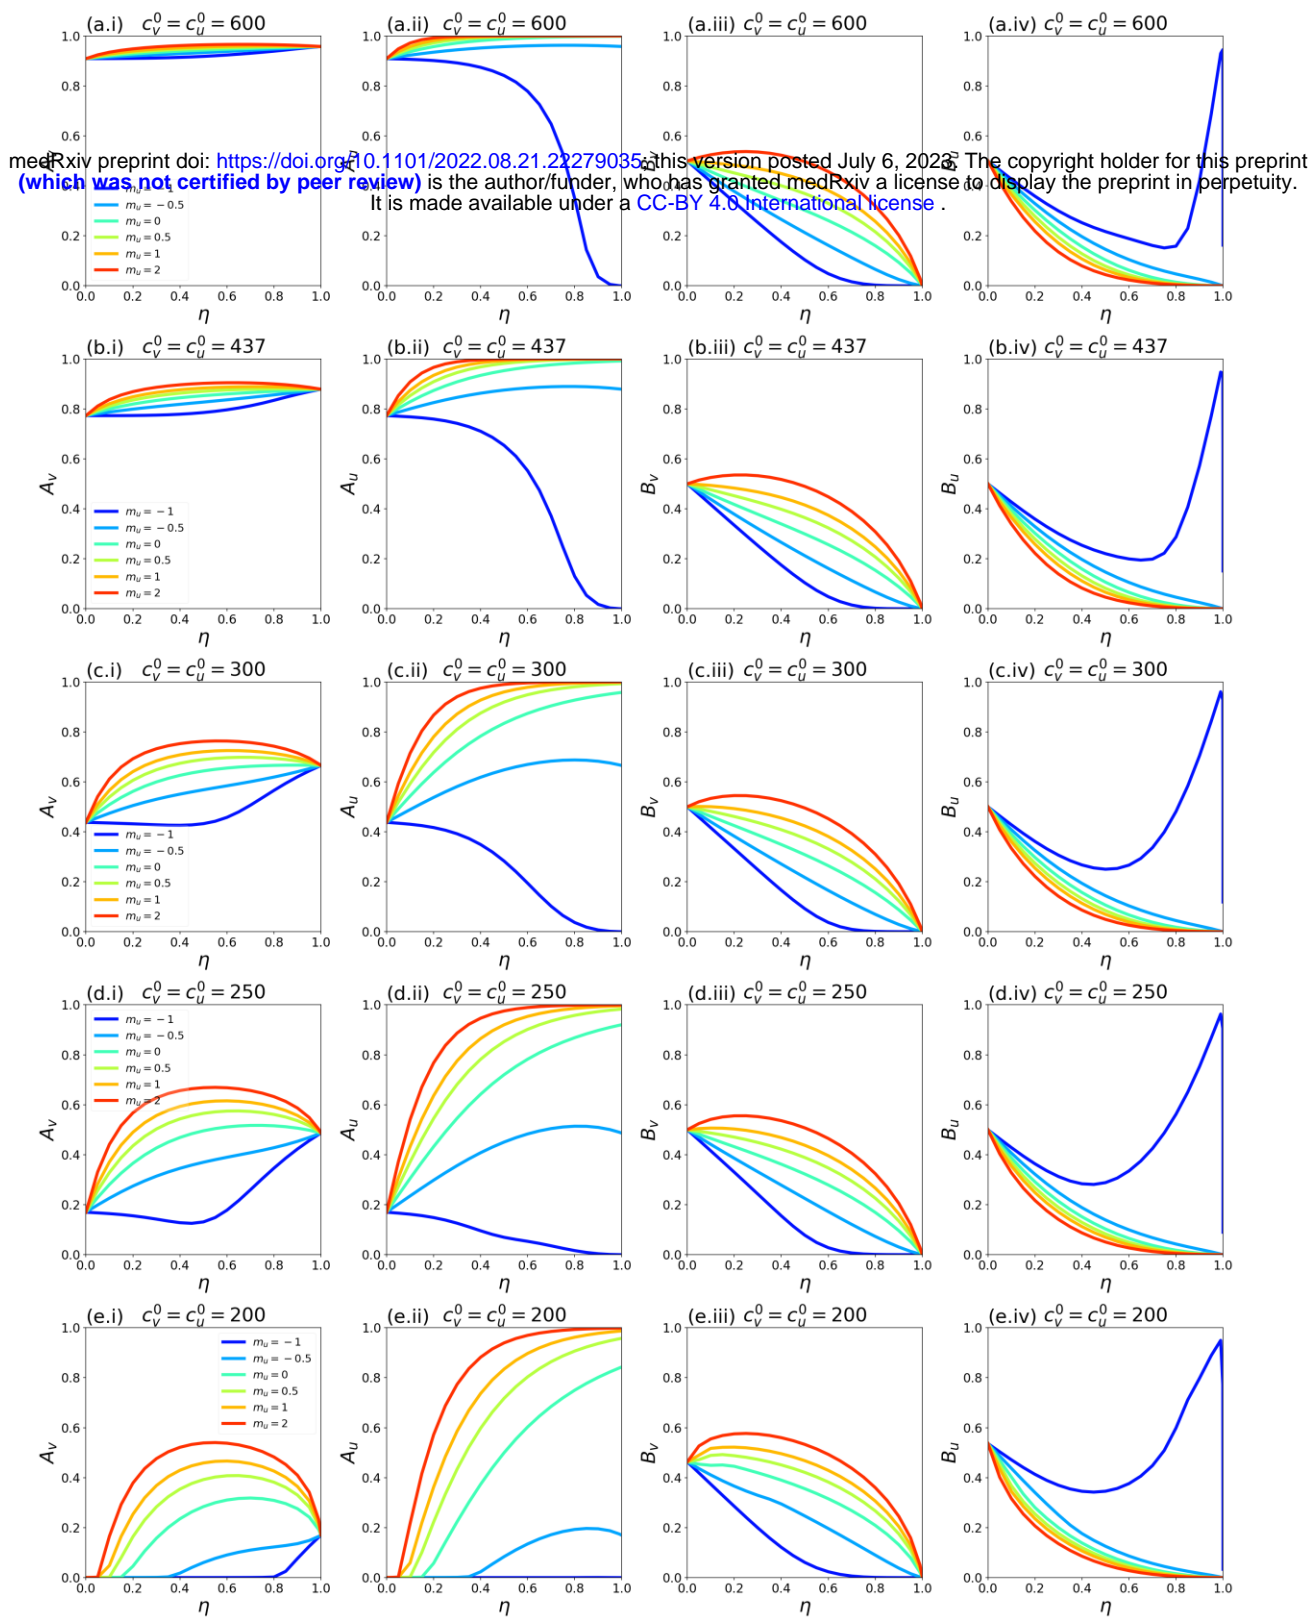

fig. A2.25: Same as Fig. A2.24, except that  $m_v = 1$ .

$P_v=0.8, V_E=0.8, N_I=0.2, m_v = -1, \gamma = 73$

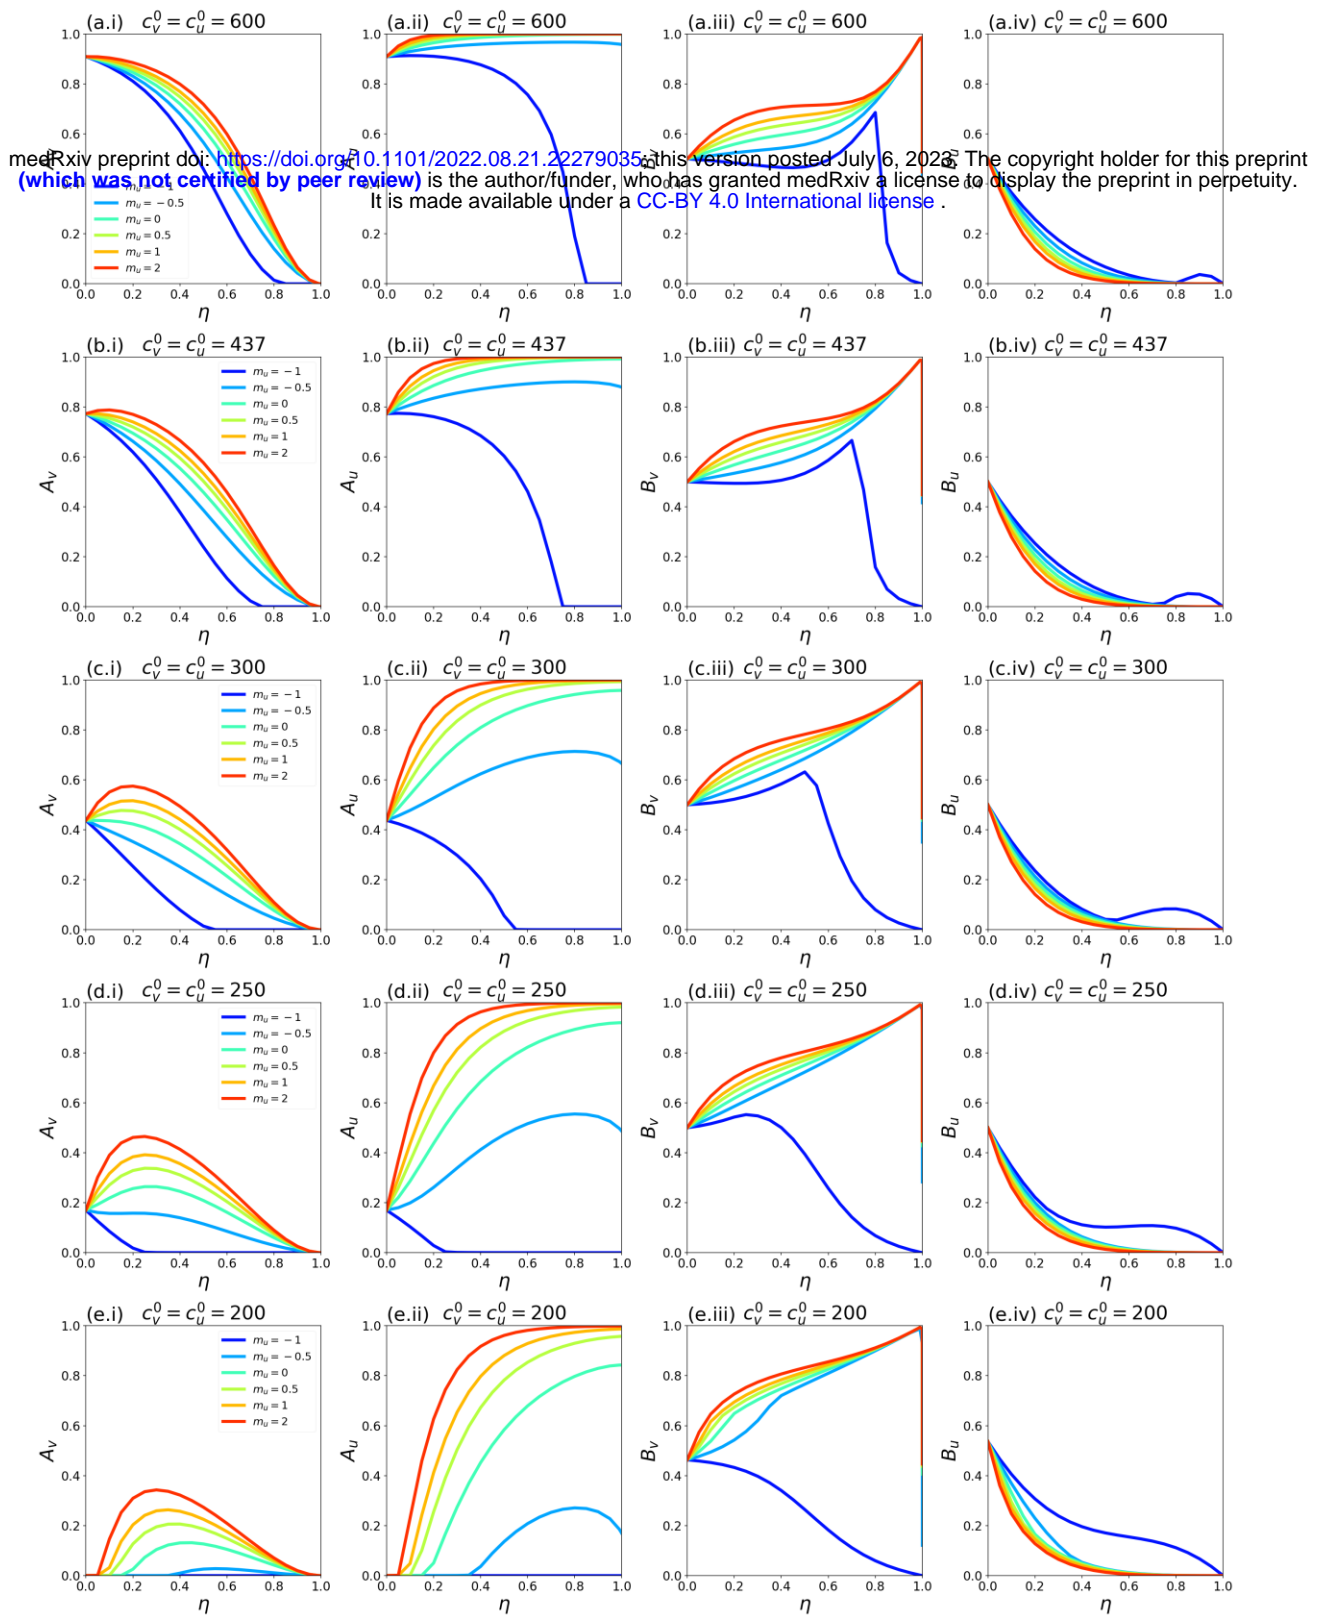

Fig. A2.26: Same as Fig. A2.24, except that  $m_v = -1$ .

## A2.4: Epidemic outcomes for different values of $c_v^0 \neq c_u^0$

### A2.4.1: Fixed $c_v^0$ , vary $c_v^0/c_u^0$

medRxiv preprint doi: <https://doi.org/10.1101/2022.08.21.22279035>; this version posted July 6, 2023. The copyright holder for this preprint (which was not certified by peer review) is the author/funder, who has granted medRxiv a license to display the preprint in perpetuity. It is made available under a [CC-BY 4.0 International license](#).

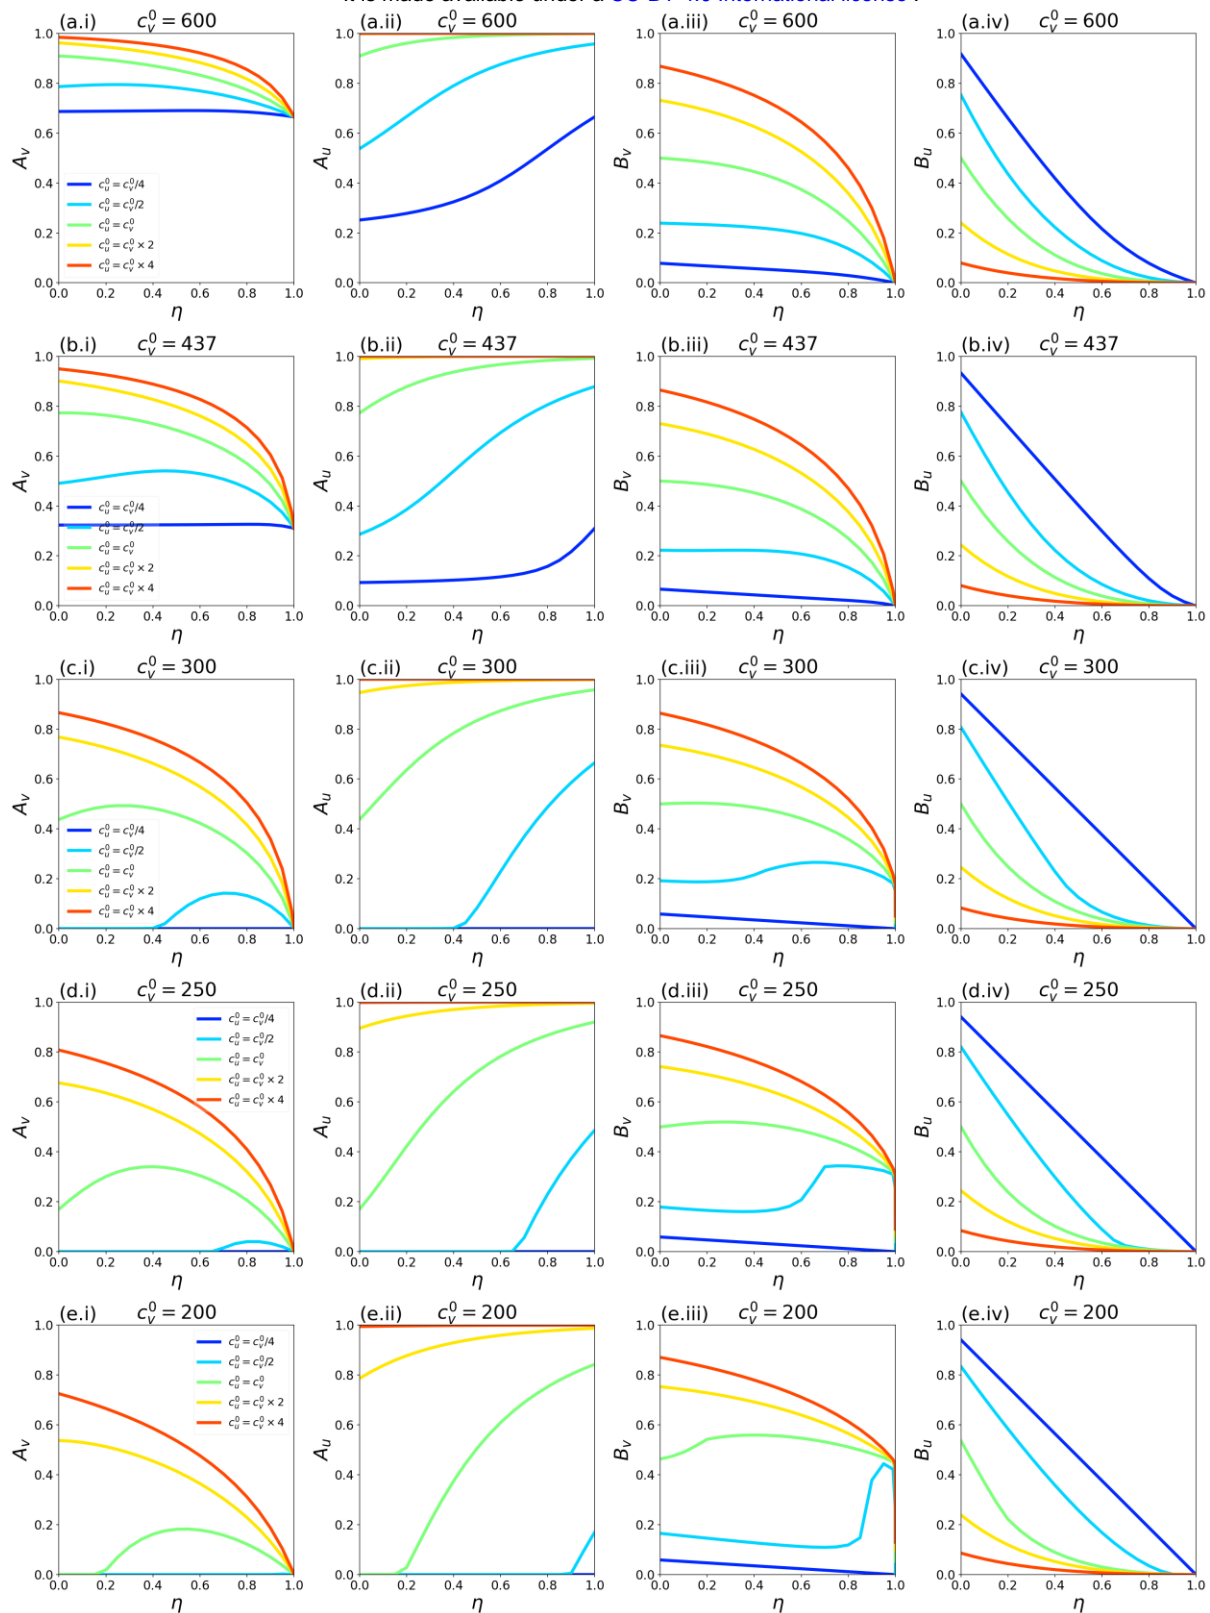

Fig. A2.27:  $c_v^0 \neq c_u^0$ ,  $m_u = m_v = 0$ ,  $\gamma_u = \gamma_v = 73$ ,  $VE = 0.8$ ,  $NI = 0.2$ , various choices of  $c_v^0/c_u^0$  (see legend within left-column panels), showing  $A_v$ ,  $A_u$ ,  $B_v$ , and  $B_u$  as functions of  $\eta$ .  $c_v^0$  is fixed for each row in the figure and decreases moving down the rows.

Pv=0.8, VE=0.8, NI=0.2,  $m_u = 1$ ,  $m_v = 0$ ,  $\gamma = 73$

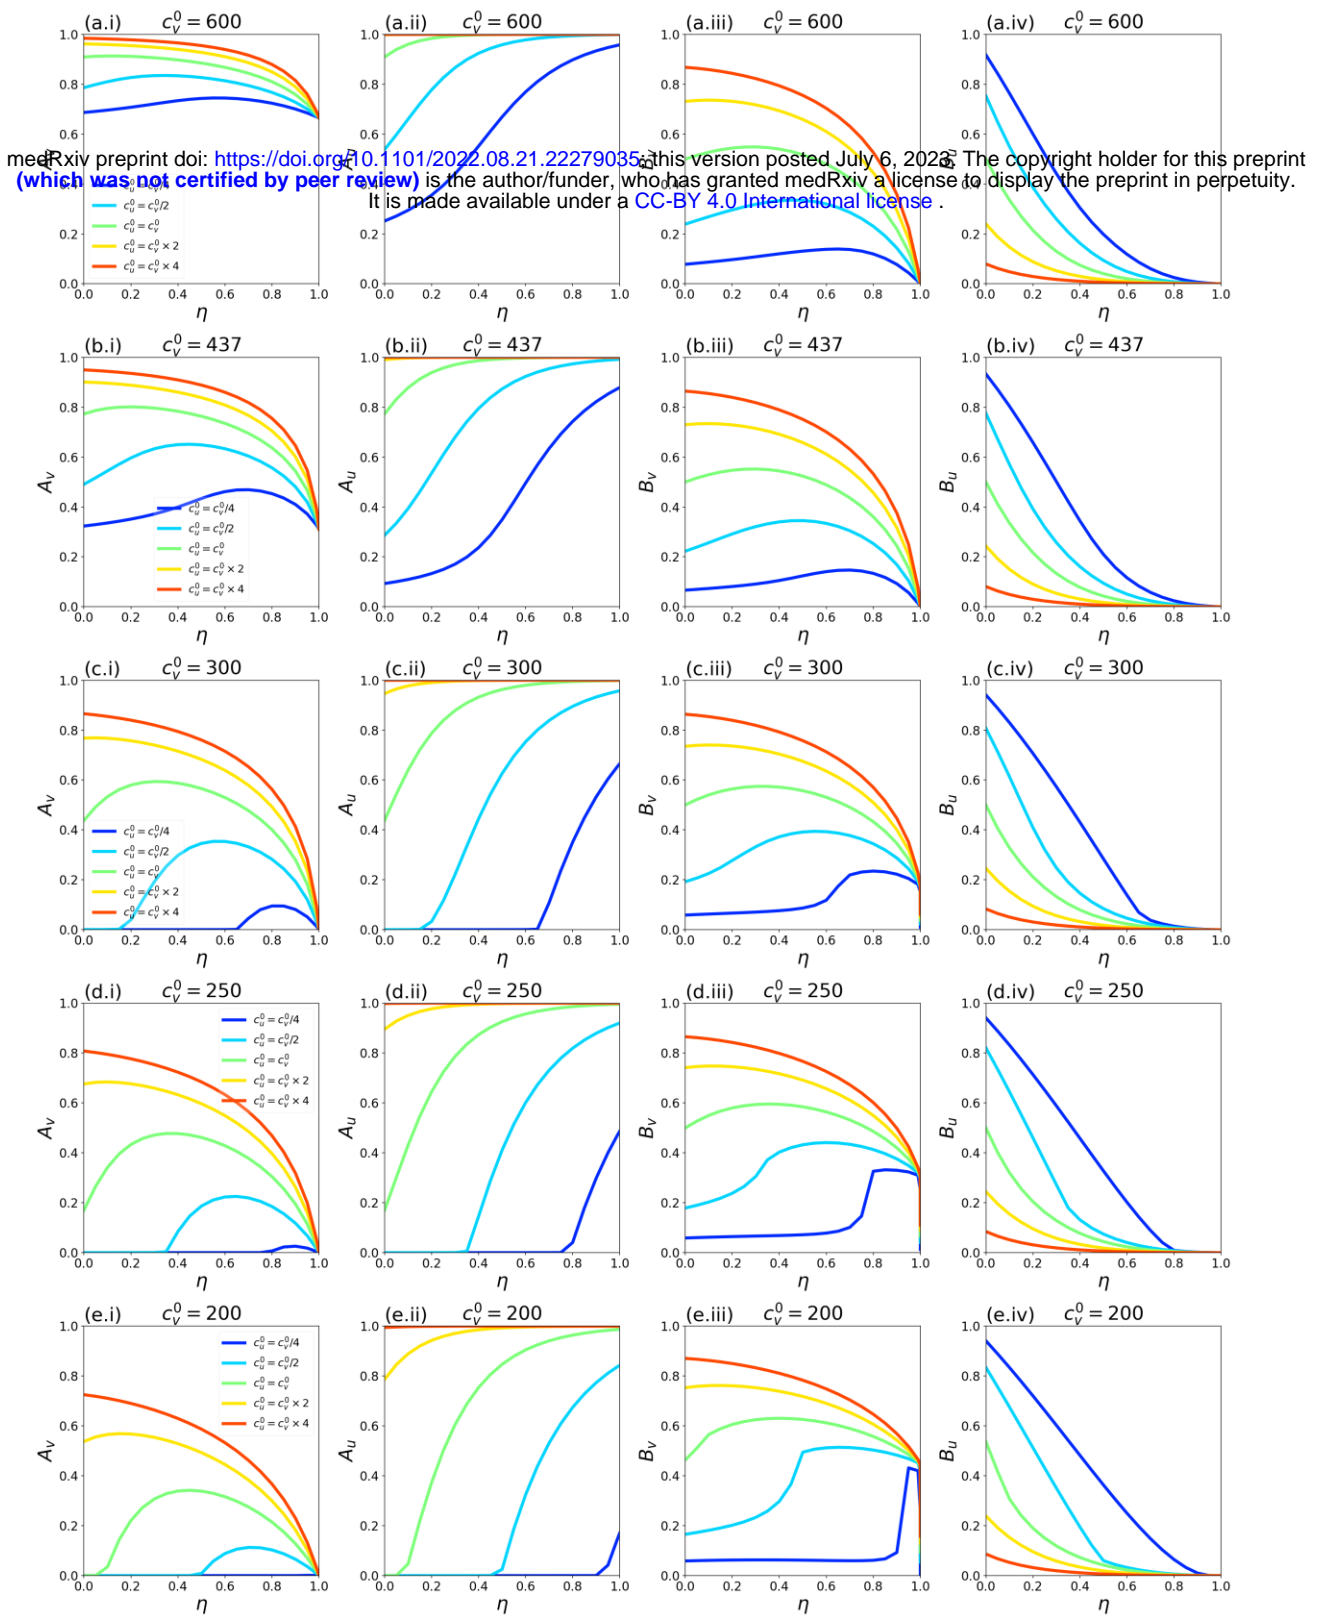

Fig. A2.28: Same as Fig. A2.27, except that  $m_u = 1$ .

$P_v=0.8, V_E=0.8, N_I=0.2, m_u = -1, m_v = 0, \gamma = 73$

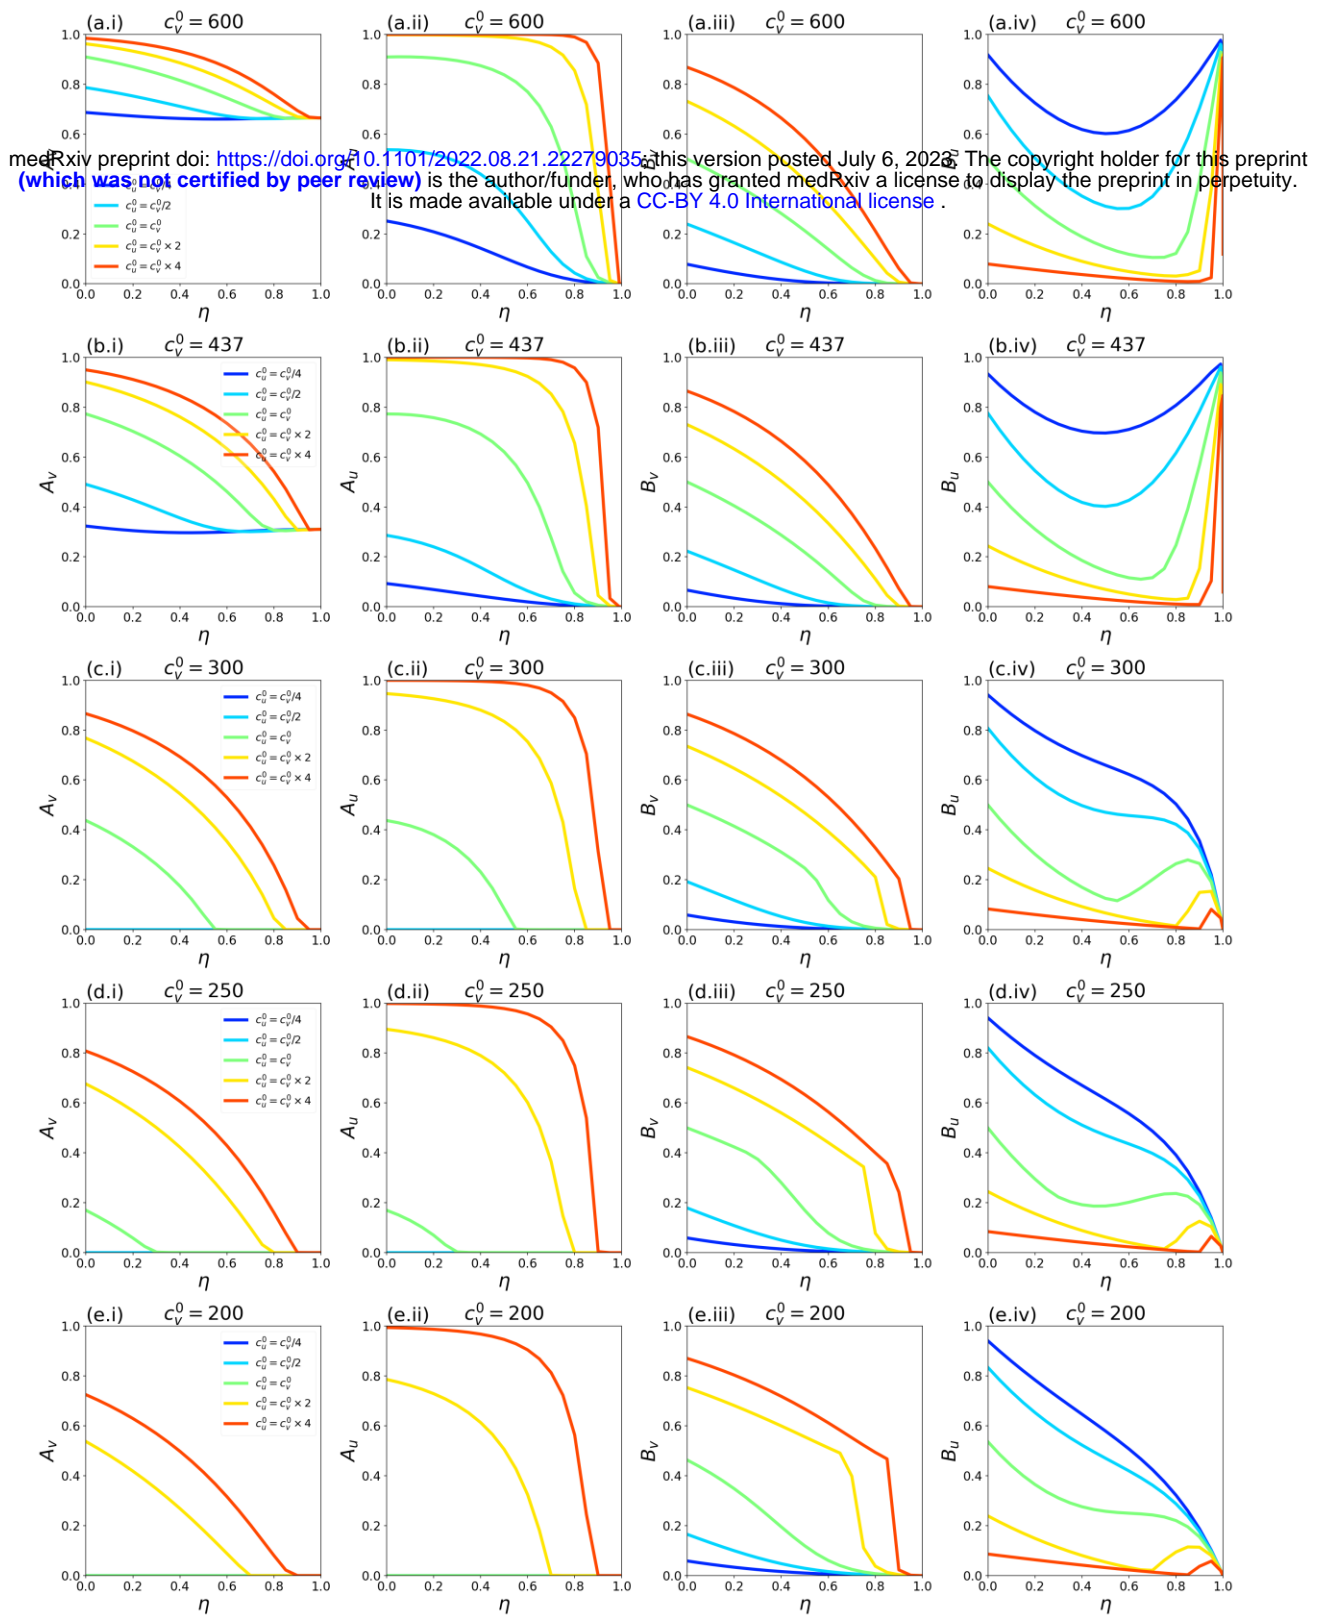

Fig. A2.29: Same as Fig. A2.27, except that  $m_u = -1$ .

### A2.4.2: Fixed weighted sum $P_V c_V^0 + (1 - P_V) c_U^0$

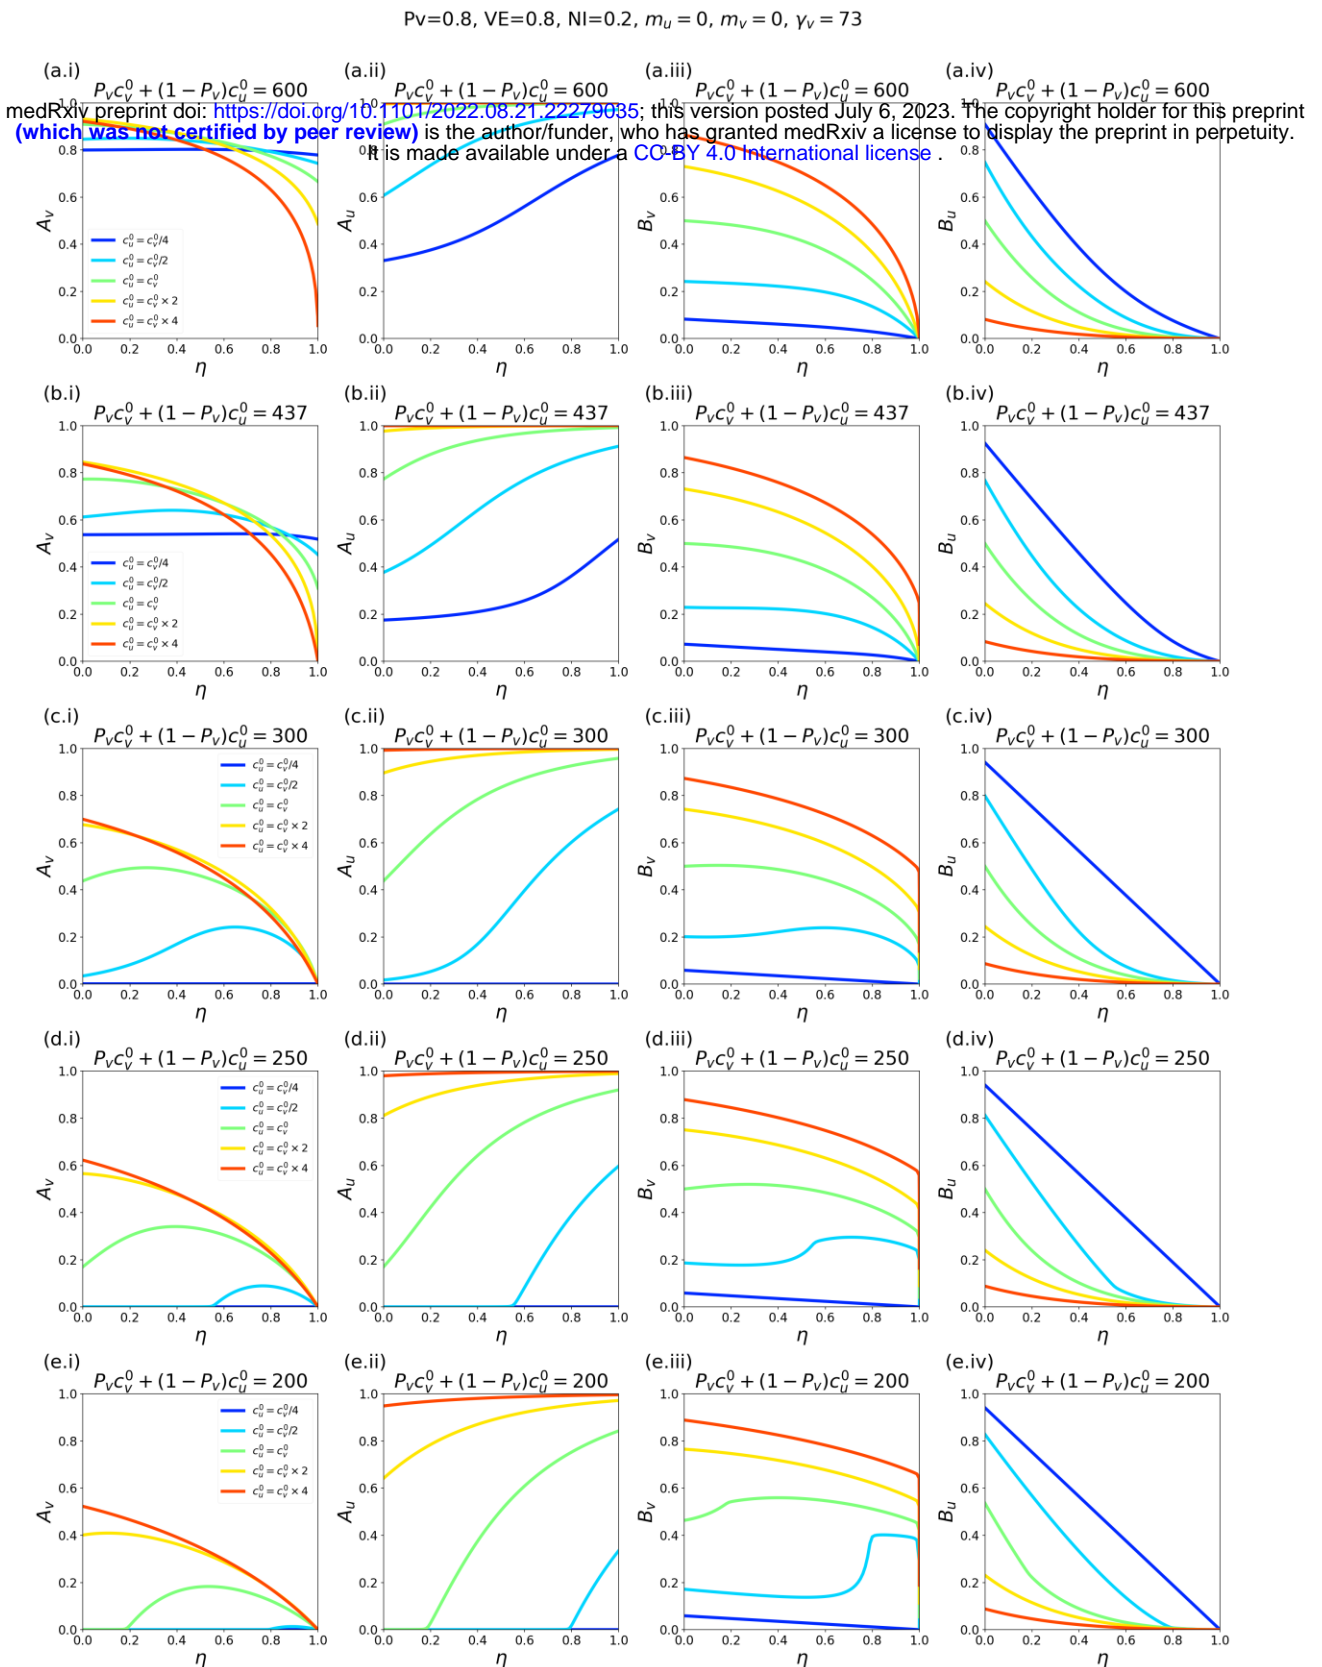

Fig. A.30:  $c_V^0 \neq c_U^0$ ,  $m_U = m_V = 0$ ,  $\gamma_U = \gamma_V = 73$ ,  $VE = 0.8$ ,  $NI = 0.2$ , various choices of  $c_U^0/c_V^0$  (see legend within left-column panels), showing  $A_V$ ,  $A_U$ ,  $B_V$ , and  $B_U$  as functions of  $\eta$ . The weighted sum  $P_V c_V^0 + (1 - P_V) c_U^0$  is fixed for each row in the figure and decreases moving down the rows.

$P_V=0.8, V_E=0.8, N_I=0.2, m_u = 1, m_v = 0, \gamma_v = 73$

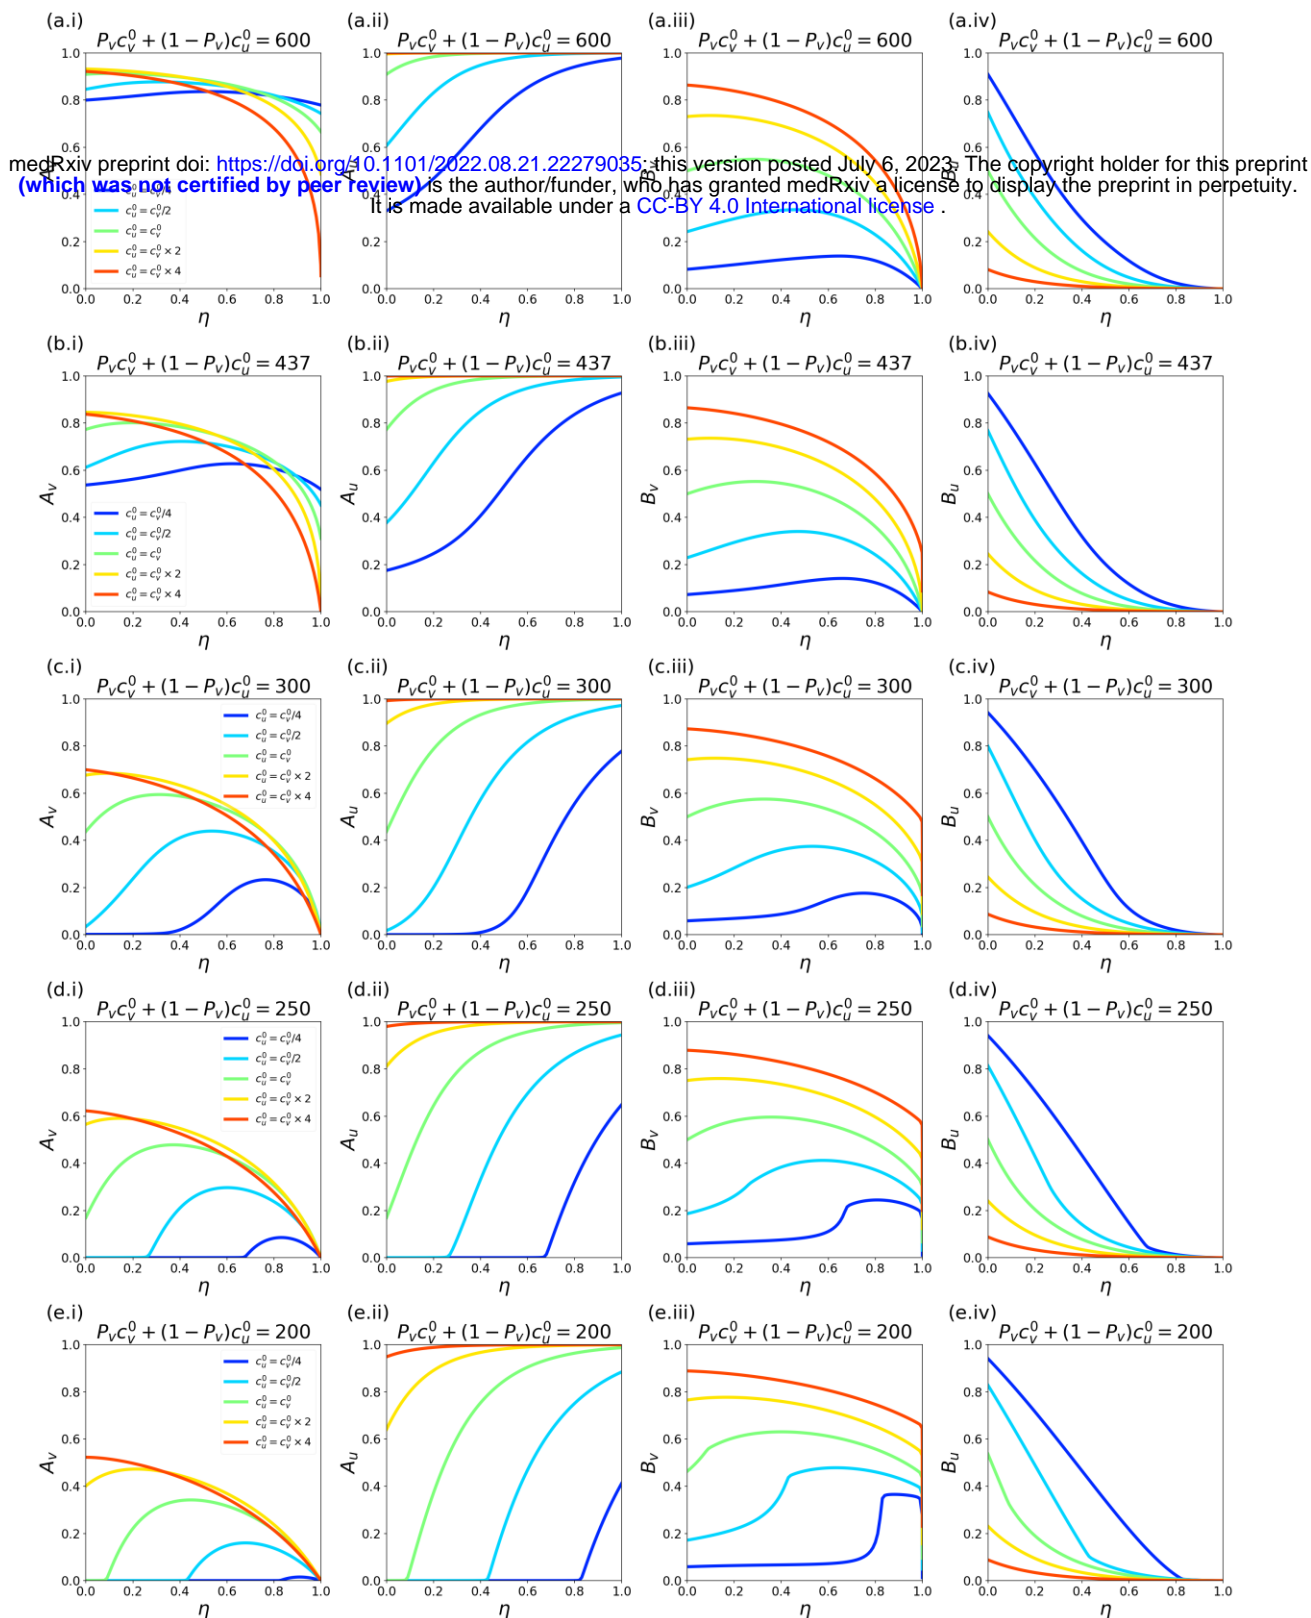

Fig. A.31: Same as Fig. A.30, except that  $m_u = 1$ .



$P_V=0.8, VE=0.8, NI=0.2, m_u = -1, m_v = 0, \gamma_v = 73$

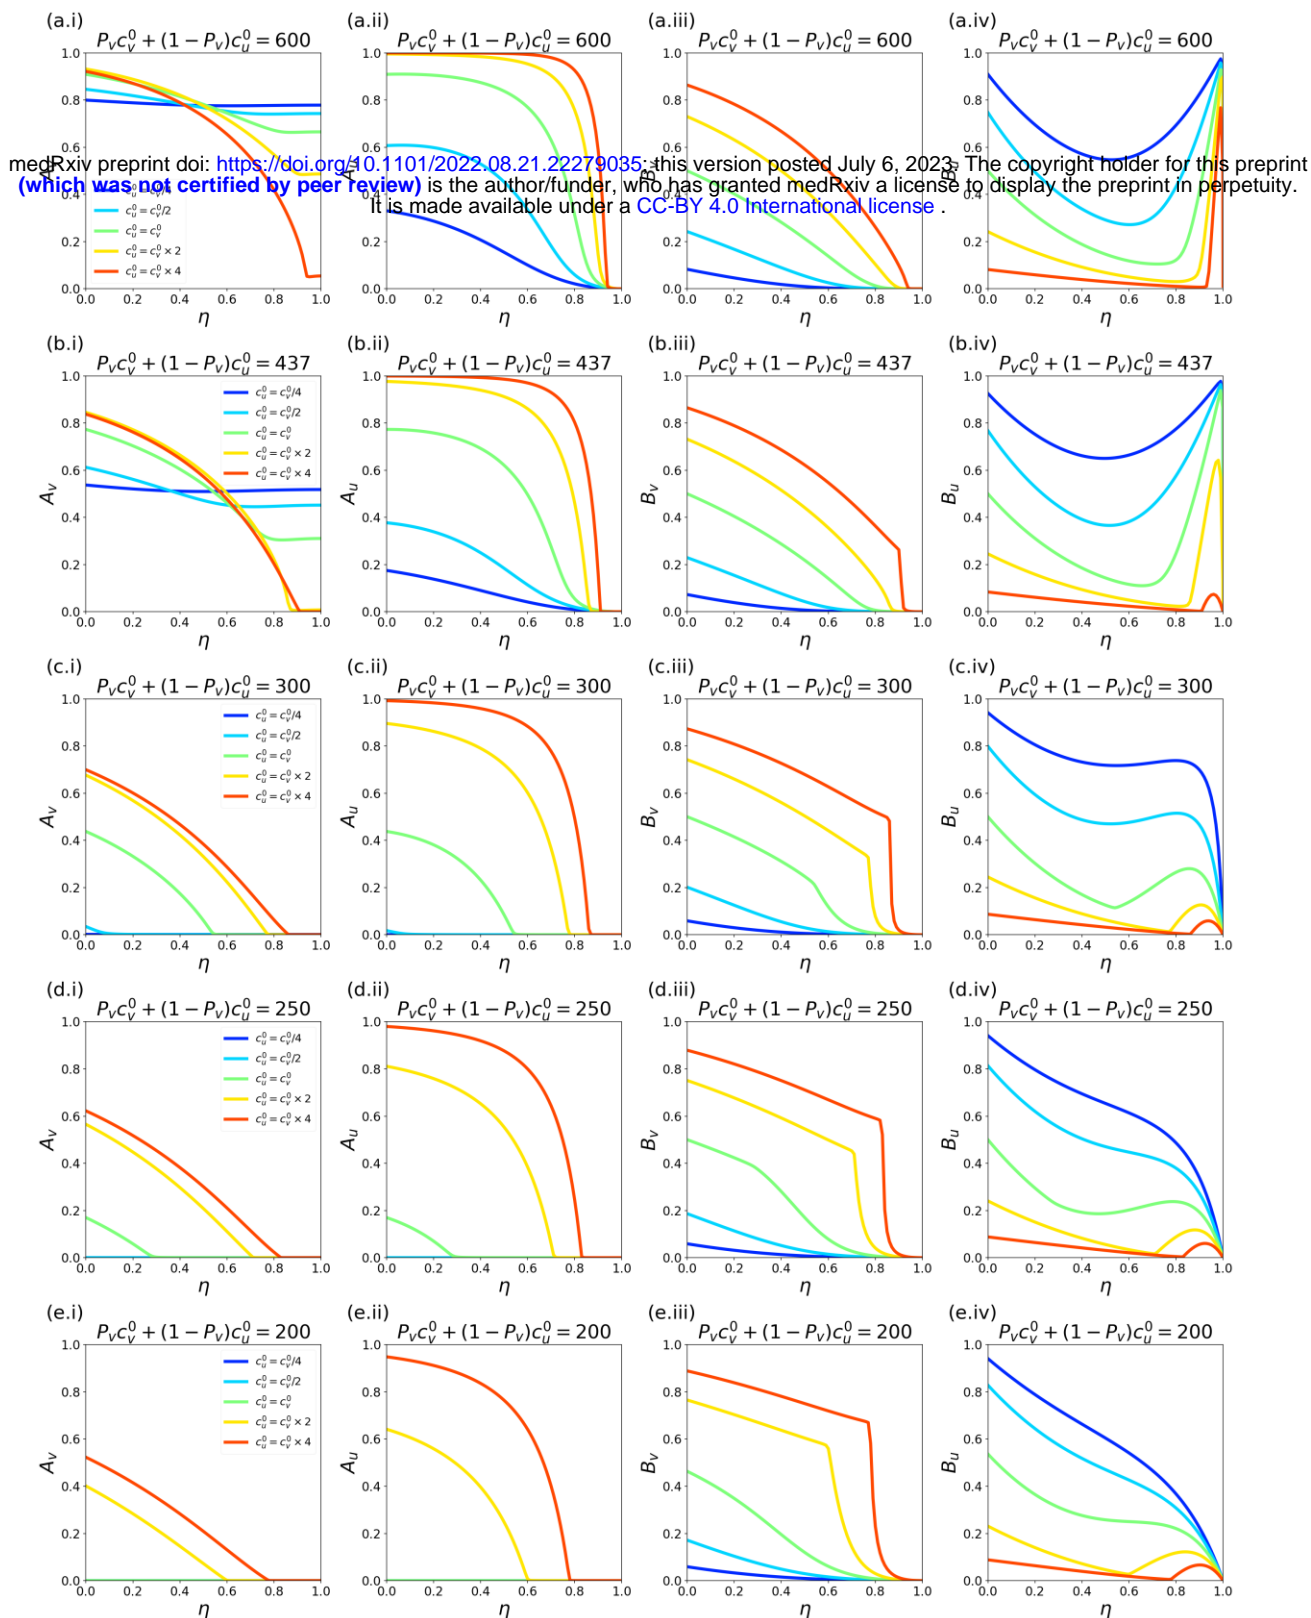

Fig. A.32: Same as Fig. A.30, except that  $m_u = -1$ .
